# Supplementary material
Source: publisher site journal article supplement (https://www.dovepress.com/get_supplementary_file.php?f=230849.xlsx)
Supplement: Supplementary file 1 [file get_supplementary_file.php]

## Sheet: Table S1
Table S1 The list of the phosphoproteins identified in three replicates.
																HCC	HCC	HCC	HCC	HCC	HCC	Pcan	Pcan	Pcan	Pcan	Pcan	Pcan	PVTT	PVTT	PVTT	PVTT	PVTT	PVTT
																1106-1	1199-1	1119-1	1468-1	1341-1	1108-1	1106-2	1199-2	1119-2	1341-2	1468-2	1108-2	1106-M	1199-M	1108-M	1119-M	1341-M	1468-M
Checked	Protein FDR Confidence	Master	Accession	Description	Exp. q-value	Sum PEP Score	Coverage	# Peptides	# PSMs	# Unique Peptides	# Protein Groups	# AAs	MW [kDa]	calc. pI	Modifications	Abundance Ratio: (F1, 113) / (F1, 119)	Abundance Ratio: (F2, 113) / (F2, 119)	Abundance Ratio: (F2, 116) / (F2, 119)	Abundance Ratio: (F3, 116) / (F3, 119)	Abundance Ratio: (F3, 113) / (F3, 119)	Abundance Ratio: (F1, 116) / (F1, 119)	Abundance Ratio: (F1, 114) / (F1, 119)	Abundance Ratio: (F2, 114) / (F2, 119)	Abundance Ratio: (F2, 117) / (F2, 119)	Abundance Ratio: (F3, 114) / (F3, 119)	Abundance Ratio: (F3, 117) / (F3, 119)	Abundance Ratio: (F1, 117) / (F1, 119)	Abundance Ratio: (F1, 115) / (F1, 119)	Abundance Ratio: (F2, 115) / (F2, 119)	Abundance Ratio: (F1, 118) / (F1, 119)	Abundance Ratio: (F2, 118) / (F2, 119)	Abundance Ratio: (F3, 115) / (F3, 119)	Abundance Ratio: (F3, 118) / (F3, 119)	Abundances (Scaled): F1: 113, Sample	Abundances (Scaled): F1: 114, Sample	Abundances (Scaled): F1: 115, Sample	Abundances (Scaled): F1: 116, Sample	Abundances (Scaled): F1: 117, Sample	Abundances (Scaled): F1: 118, Sample	Abundances (Scaled): F1: 119, Control	Abundances (Scaled): F2: 113, Sample	Abundances (Scaled): F2: 114, Sample	Abundances (Scaled): F2: 115, Sample	Abundances (Scaled): F2: 116, Sample	Abundances (Scaled): F2: 117, Sample	Abundances (Scaled): F2: 118, Sample	Abundances (Scaled): F2: 119, Control	Abundances (Scaled): F3: 113, Sample	Abundances (Scaled): F3: 114, Sample
FALSE	High	Master Protein	Q9UQ35	Serine/arginine repetitive matrix protein 2 OS=Homo sapiens GN=SRRM2 PE=1 SV=2	0	333.989	26.7805	68	539	68	1	2752	299.438	12.06	Phospho [S231(100); T233(100); S250(99); T251(99); S295(100); S297(100); S322(97.8); S333(100); S351(98.1); S353(100); S377(100); S456(99.2); S562(100); S564(100); S778(98.7); S780(98.7); S820(98.9); S837(97.1); S838(98.5); T866(100); S876(99); S950(100); S954(99.9); S974(98.8); S994(100); T1003(100); S1014(98.5); T1043(98); S1064(99.1); S1083(100); S1102(97.9); S1112(97.9); S1124(99.1); S1132(10…	0.876	1.156	0.995	1.326	0.616	1.114	1.052	1.03	0.968	0.792	0.955	0.961	1.012	0.816	1.118	0.945	1.063	1.408	86	103.3	99.3	109.3	94.3	109.7	98.1	117.1	104.3	82.6	100.8	98	95.8	101.3	60.2	77.5
FALSE	High	Master Protein	P02768	Serum albumin OS=Homo sapiens GN=ALB PE=1 SV=2	0	262.859	61.5764	38	353	38	1	609	69.321	6.28	Phospho [S82(100)]	1.067	0.576	1.127	0.875	2.101	0.85	0.738	0.795	0.839	0.955	0.965	1.022	0.775	1.682	0.707	1.646	0.845	0.671	121.2	83.9	88	96.6	116.2	80.4	113.7	52.6	72.6	153.6	102.9	76.6	150.3	91.3	198.4	90.2
FALSE	High	Master Protein	A9Z1X7	Serine/arginine repetitive matrix protein 1 OS=Homo sapiens GN=SRRM1 PE=1 SV=1	0	255.095	34.3921	48	408	47	1	913	103.329	11.85	Phospho [T220(100); S384(100); S397(100); T401(100); S409(100); S445(100); S458(98.2); S547(100); S558(100); S560(100); S569(100); S571(100); T581(100); T583(100); T590(100); S592(100); S606(100); S614(100); S616(100); T623(100); S625(100); S635(100); S637(100); S645(100); S647(100); S662(95); S684(100); S692(100); S694(100); S714(100); S715(98.4); S722(100); S724(100); S734(100); T736(100); S747…	0.811	1.221	0.952	1.21	0.432	1.088	1.032	1.123	0.894	0.778	0.949	0.966	1.091	0.778	1.146	0.979	1.217	1.334	79.6	101.3	107	106.7	94.8	112.4	98.1	123.1	113.1	78.4	95.9	90.1	98.6	100.8	43.7	78.7
FALSE	High	Master Protein	Q09666	Neuroblast differentiation-associated protein AHNAK OS=Homo sapiens GN=AHNAK PE=1 SV=2	0	246.884	24.1596	56	327	56	1	5890	628.699	6.15	Phospho [S93(100); S135(100); S176(98.9); S216(100); S511(100); S570(99.2); S1068(100); S1123(100); S1580(100); S2836(100); S3412(100); T4100(100); S4425(98.6); S4960(98); S5110(100); S5298(100); S5318(100); S5400(100); S5448(100); S5739(100); S5763(98.9); T5794(95.4); S5830(100); S5841(98.6); S5851(100); S5870(100)]	0.999	1.508	0.782	0.609	0.905	0.843	1.232	1.071	1.169	1.158	1.044	1.038	0.898	0.975	0.905	0.979	0.996	0.649	101.2	124.7	90.9	85.3	105.1	91.6	101.2	141.1	100.2	91.2	73.2	109.3	91.6	93.5	99.5	127.4
FALSE	High	Master Protein	P02751	Fibronectin OS=Homo sapiens GN=FN1 PE=1 SV=4	0	212.798	23.7636	37	176	37	1	2386	262.46	5.71	Phospho [S2384(100)]	2.695	0.617	0.869	0.487	1.599	0.653	0.861	0.579	0.49	0.588	0.474	0.629	1.724	1.117	0.751	0.904	0.564	0.666	227	72.5	145.2	55	53	63.2	84.2	77.5	72.7	140.3	109	61.5	113.5	125.5	208.2	76.5
FALSE	High	Master Protein	P08670	Vimentin OS=Homo sapiens GN=VIM PE=1 SV=4	0	189.645	71.2446	32	286	25	1	466	53.619	5.12	Phospho [T20(98.1); S39(98.6); S55(98.8); S73(100); S214(100); S325(99.9); S420(99); S430(100)]	1.009	0.942	1.004	1.061	0.7	0.769	1.267	1.02	0.933	0.872	0.771	0.975	0.909	1.167	1.005	1.267	0.868	1.173	101.9	127.9	91.8	77.7	98.4	101.4	100.9	89.9	97.4	111.4	95.8	89.1	121	95.5	76.1	94.7
FALSE	High	Master Protein	P35579	Myosin-9 OS=Homo sapiens GN=MYH9 PE=1 SV=4	0	155.207	20.2041	30	147	26	1	1960	226.392	5.6	Phospho [S1114(98.4); S1943(100)]	1.065	0.616	0.797	0.675	1.288	0.676	0.955	0.87	0.653	1.142	0.677	0.761	0.71	1.332	0.781	1.703	0.734	0.745	125.3	112.4	83.5	79.6	89.6	91.9	117.7	61.9	87.4	133.7	80.1	65.6	171	100.4	144	127.7
FALSE	High	Master Protein	P02545	Prelamin-A/C OS=Homo sapiens GN=LMNA PE=1 SV=1	0	131.306	35.994	22	202	22	1	664	74.095	7.02	Phospho [S301(100); S392(98.9); S458(100); S533(98.1); S636(100)]	0.948	1.132	0.881	1.564	0.587	0.969	1.212	1.024	0.887	0.823	0.977	1.124	1.162	0.901	1.014	1.103	0.972	1.572	89.3	114.2	109.5	91.3	105.9	95.6	94.2	114.4	103.5	91	89	89.7	111.4	101	54.8	76.9
FALSE	High	Master Protein	Q9P2E9	Ribosome-binding protein 1 OS=Homo sapiens GN=RRBP1 PE=1 SV=4	0	128.516	31.773	27	101	27	1	1410	152.381	8.6	Phospho [T275(98.9); S533(100); S573(100); S583(100); S615(100); T715(100); T715(100); T715(100); T717(100); T717(100); T717(100); T717(100); T717(100); T717(100); S959(100)]	0.917	2.19	0.697	1.078	0.387	1.233	0.86	1.167	1.396	0.787	1.265	0.955	1.238	0.648	1.135	0.774	1.115	0.915	87.5	82	118.1	117.6	91.1	108.3	95.4	194.8	103.8	57.6	62	124.1	68.8	88.9	41.4	84.1
FALSE	High	Master Protein	P05787	Keratin, type II cytoskeletal 8 OS=Homo sapiens GN=KRT8 PE=1 SV=7	0	124.481	57.1429	25	157	22	1	483	53.671	5.59	Phospho [S24(100); S37(98.7); S258(100); S330(100); S410(100); S442(98)]	1.033	1.019	0.671	0.575	0.397	1.144	1.208	1.166	0.957	0.965	0.922	1.027	1.228	0.651	1.302	0.79	0.846	0.724	91.1	106.5	108.2	100.8	90.6	114.7	88.1	114.1	130.5	72.9	75.2	107.1	88.4	111.9	51.2	124.4
FALSE	High	Master Protein	Q9C0C2	182 kDa tankyrase-1-binding protein OS=Homo sapiens GN=TNKS1BP1 PE=1 SV=4	0	108.787	20.0116	24	130	24	1	1729	181.685	4.86	Phospho [S221(100); S429(100); S494(100); S601(100); S672(100); S691(100); S724(100); S836(100); S872(100); S893(100); S920(98.9); T979(88.9); S1024(100); S1158(98.5); S1297(100); S1533(100); S1552(98.9)]	0.819	1.137	0.826	0.859	0.759	0.879	0.944	1.096	1.349	0.967	1.075	0.903	0.798	0.907	0.793	0.883	0.904	0.807	93.4	107.7	91	100.3	103	90.4	114.1	110.6	106.6	88.2	80.3	131.2	85.9	97.2	83.4	106.2
FALSE	High	Master Protein	Q9NYF8	Bcl-2-associated transcription factor 1 OS=Homo sapiens GN=BCLAF1 PE=1 SV=2	0	99.2637	16.9565	17	153	16	1	920	106.059	9.98	Phospho [S177(100); S222(100); S264(100); S268(100); S290(100); S385(100); S397(100); S496(100); S512(100); S648(100); S658(100); S760(98.7)]	0.845	1.061	1.604	1.432	0.692	1.307	0.943	0.932	1.007	0.822	0.965	0.971	1.09	0.781	1.18	0.838	1.047	1.623	80.6	90	104	124.7	92.7	112.6	95.4	102.8	90.4	75.7	155.4	97.6	81.2	96.9	63.9	75.9
FALSE	High	Master Protein	Q13501	Sequestosome-1 OS=Homo sapiens GN=SQSTM1 PE=1 SV=1	0	98.0673	44.0909	9	95	9	1	440	47.657	5.22	Phospho [S24(100); S152(100); S249(100); T269(100); S306(95.8); S332(100)]	1.618	0.912	0.558	1.296	1.078	0.934	0.75	0.556	0.453	0.679	0.525	0.595	1.947	0.65	0.889	0.585	1.604	0.975	146.4	67.9	176.3	84.5	53.9	80.5	90.5	135.4	82.5	96.5	82.9	67.2	86.9	148.5	105.4	66.4
FALSE	High	Master Protein	Q9H1E3	Nuclear ubiquitous casein and cyclin-dependent kinase substrate 1 OS=Homo sapiens GN=NUCKS1 PE=1 SV=1	0	96.3097	62.963	16	97	16	1	243	27.28	5.08	Phospho [S19(100); S61(100); S79(100); S113(100); S144(99.9); S181(100); S214(100)]	0.847	1.29	1.105	1.113	0.546	1.487	0.914	1.059	1.159	0.852	1.421	1.097	1.035	0.805	1.107	0.777	0.871	0.821	79.2	85.4	96.8	139	102.6	103.5	93.5	125.5	103.1	78.3	107.5	112.8	75.6	97.3	57.7	90.1
FALSE	High	Master Protein	P08238	Heat shock protein HSP 90-beta OS=Homo sapiens GN=HSP90AB1 PE=1 SV=4	0	93.2575	23.0663	15	79	9	1	724	83.212	5.03	Phospho [S226(100); S255(100)]	1.13	0.631	1.901	0.786	0.975	1.164	0.774	0.73	0.721	1.624	0.607	0.783	0.94	1.029	1.027	0.771	0.963	0.808	116	79.5	96.5	119.5	80.4	105.4	102.7	65.1	75.3	106.2	196.2	74.4	79.6	103.2	101	168.1
FALSE	High	Master Protein	P24821	Tenascin OS=Homo sapiens GN=TNC PE=1 SV=3	0	89.6861	12.9487	13	61	13	1	2201	240.7	4.89	Phospho [S72(100); S903(100)]	0.87	0.589	0.796	0.627	5.021	0.303	0.577	0.529	0.521	1.095	0.56	0.379	0.384	0.812	0.491	0.624	0.862	0.835	152.2	100.8	67.1	52.9	66.2	85.9	174.8	84.6	76.1	116.7	114.4	74.9	89.7	143.7	351.5	76.6
FALSE	High	Master Protein	P05783	Keratin, type I cytoskeletal 18 OS=Homo sapiens GN=KRT18 PE=1 SV=2	0	85.5483	30.6977	12	134	12	1	430	48.029	5.45	Phospho [T65(93.6); S100(100); S420(100)]	1.138	0.715	0.568	0.303	1.017	1.148	1.148	1.13	0.85	2.875	1.168	1.057	1.532	0.476	1.356	0.582	0.827	0.461	95.1	95.9	128	95.9	88.3	113.3	83.5	94.1	148.6	62.6	74.8	111.8	76.6	131.5	93.1	263.1
FALSE	High	Master Protein	P62736	Actin, aortic smooth muscle OS=Homo sapiens GN=ACTA2 PE=1 SV=1	0	84.6408	44.0318	14	98	5	1	377	41.982	5.39	Phospho [S235(98.2)]	1.11	0.528	0.871	0.669	0.709	0.822	1.065	1.059	0.577	1.138	0.567	0.866	0.77	1.814	0.977	2.208	0.704	0.867	117.6	112.8	81.6	87	91.7	103.5	105.9	45.9	92	157.6	75.7	50.1	191.8	86.9	87.8	140.9
FALSE	High	Master Protein	E9PMS6	LIM domain only protein 7 OS=Homo sapiens GN=LMO7 PE=1 SV=1	0	83.9703	19.3725	16	117	16	1	1275	145.334	7.3	Phospho [S251(100); S370(100); S432(97.9); S525(100); S553(97); S591(100); T1017(100); S1085(97.9); S1102(100); S1178(95.1); S1185(100)]	0.962	1.064	0.902	0.717	0.921	0.98	1.097	1.008	1.072	1.066	1.023	0.934	1.033	0.827	1.002	0.838	0.906	0.953	96.1	109.6	103.2	97.9	93.3	100.1	99.9	111	105.1	86.2	94.1	111.9	87.4	104.3	97.9	113.3
FALSE	High	Master Protein	P68871	Hemoglobin subunit beta OS=Homo sapiens GN=HBB PE=1 SV=2	0	82.8004	77.551	10	139	5	1	147	15.988	7.28	Phospho [S45(100)]	0.531	0.712	0.647	0.585	0.637	0.493	1.428	1.663	1.312	0.87	1.355	2.37	0.658	2.418	0.562	1.245	0.736	0.504	52.7	141.9	65.4	49	235.6	55.9	99.4	55.4	129.4	188.1	50.4	102.1	96.9	77.8	78.4	107.1
FALSE	High	Master Protein	P10451	Osteopontin OS=Homo sapiens GN=SPP1 PE=1 SV=1	0	78.261	42.3567	13	64	13	1	314	35.401	4.58	Phospho [S26(97); S27(99.9); S219(98.5); S234(100); S275(100); S280(100)]	0.989	0.606	0.686	1.113	2.416	0.635	0.627	0.506	0.48	0.962	0.798	0.553	0.742	0.937	0.753	0.493	0.951	1.054	130.6	82.9	98	83.9	73	99.5	132.1	90.1	75.2	139.3	102	71.3	73.3	148.7	203.9	81.2
FALSE	High	Master Protein	P10809	60 kDa heat shock protein, mitochondrial OS=Homo sapiens GN=HSPD1 PE=1 SV=2	0	75.0801	41.1867	16	63	16	1	573	61.016	5.87	Phospho [S70(100)]	1.177	1.047	0.919	1.495	0.82	1.02	0.905	0.96	1.275	1.023	1.142	1.19	1.318	0.796	1.001	0.741	1.515	1.354	108.3	83.3	121.3	93.8	109.5	92	92	108.8	99.7	82.7	95.5	132.5	76.9	103.9	68.8	85.8
FALSE	High	Master Protein	P35749	Myosin-11 OS=Homo sapiens GN=MYH11 PE=1 SV=3	0	71.4638	10.0913	14	66	10	1	1972	227.199	5.5	Phospho [S8(100); S1954(100)]	0.67	0.55	0.732	0.608	2.498	0.487	0.607	0.658	0.606	1.226	0.569	0.534	0.545	1.778	0.44	2.088	0.705	0.748	109.5	99.3	89	79.6	87.3	71.9	163.4	51.9	62.1	167.9	69.2	57.2	197.2	94.4	237.8	116.7
FALSE	High	Master Protein	Q9Y2W1	Thyroid hormone receptor-associated protein 3 OS=Homo sapiens GN=THRAP3 PE=1 SV=2	0	71.1398	14.4503	17	97	16	1	955	108.601	10.15	Phospho [S55(100); S243(100); S248(100); S253(97.3); S320(95.7); S379(100); S672(100); S682(100); S698(100); S928(100); T953(91.5)]	0.874	1.14	1.126	1.551	0.449	1.255	1.12	0.973	1.097	0.813	1.182	1.061	1.074	0.666	1.173	0.731	1.131	1.505	81	103.7	99.5	116.2	98.2	108.7	92.6	118.5	101.2	69.3	117.1	114	76	104	41.2	74.6
FALSE	High	Master Protein	P51858	Hepatoma-derived growth factor OS=Homo sapiens GN=HDGF PE=1 SV=1	0	69.7767	42.5	12	77	12	1	240	26.772	4.73	Phospho [S132(98.5); S165(100); S202(98.8)]	0.899	1.563	0.93	1.87	0.666	1.199	0.885	1.055	1.466	0.985	1.457	1.159	1	0.77	0.882	0.74	0.877	0.872	89.6	88.2	99.7	119.5	115.5	87.9	99.7	145.4	98.2	71.7	86.6	136.4	68.8	93	60.3	89.2
FALSE	High	Master Protein	P27824	Calnexin OS=Homo sapiens GN=CANX PE=1 SV=2	0	68.4034	10.8108	9	72	9	1	592	67.526	4.6	Phospho [S564(98.4); S583(100)]	1.348	0.818	1.044	0.646	0.724	1.074	0.983	0.796	0.653	1.296	0.603	0.869	0.962	0.88	1.132	1.13	1.128	0.744	128.1	93.4	91.4	102.1	82.5	107.5	95	90.6	88.2	97.5	115.6	72.3	125.1	110.7	82.5	147.7
FALSE	High	Master Protein	P05062	Fructose-bisphosphate aldolase B OS=Homo sapiens GN=ALDOB PE=1 SV=2	0	68.1733	41.2088	13	65	11	1	364	39.448	7.87	Phospho [S36(100); T39(100)]	0.756	0.886	0.682	0.852	0.648	1.369	1.051	1.118	1.915	1.165	2.76	1.737	0.752	0.872	1.089	0.71	0.875	0.868	68.2	94.9	67.9	123.6	156.8	98.3	90.3	86.4	108.9	85	66.5	186.6	69.1	97.5	55.5	99.9
FALSE	High	Master Protein	P04004	Vitronectin OS=Homo sapiens GN=VTN PE=1 SV=1	0	62.6522	24.0586	7	57	7	1	478	54.271	5.8	Phospho [T76(98.5); S312(100); S403(100); S407(97.9)]	0.416	1.104	2.064	0.43	4.596	0.196	0.327	0.568	0.61	1.087	0.407	0.284	0.256	1.079	0.389	0.678	0.838	0.382	101.5	79.8	62.5	47.9	69.3	95	244	108.8	56	106.3	203.4	60.2	66.8	98.5	368.1	87
FALSE	High	Master Protein	P31327	Carbamoyl-phosphate synthase [ammonia], mitochondrial OS=Homo sapiens GN=CPS1 PE=1 SV=2	0	62.5209	14.4	16	43	16	1	1500	164.835	6.74	Phospho [S835(100); S1431(100)]	0.78	0.639	0.704	0.651	0.967	0.696	1.177	1.396	0.936	2.356	1.643	1.765	0.752	0.76	0.701	0.867	0.924	0.753	79.5	119.9	76.6	70.9	179.8	71.4	101.9	71	155.1	84.4	78.2	104	96.2	111.1	81.6	198.9
FALSE	High	Master Protein	P22626	Heterogeneous nuclear ribonucleoproteins A2/B1 OS=Homo sapiens GN=HNRNPA2B1 PE=1 SV=2	0	62.3914	48.4419	13	53	11	1	353	37.407	8.95	Phospho [S212(100); S259(100); S344(100)]	0.84	1.018	0.963	1.262	0.353	1.116	0.993	1.034	1.077	0.708	1.22	1.022	1.092	0.757	1.283	0.84	1.155	1.353	80.1	94.7	104	106.3	97.4	122.3	95.3	106.6	108.2	79.2	100.8	112.7	87.9	104.6	35.1	70.3
FALSE	High	Master Protein	P06733	Alpha-enolase OS=Homo sapiens GN=ENO1 PE=1 SV=2	0	61.3043	40.3226	15	55	13	1	434	47.139	7.39	Phospho [S27(98.8)]	1.4	0.911	0.942	1.262	1.028	1.154	0.895	0.996	1.131	0.942	1.27	0.938	1.13	0.837	1.114	0.823	1.322	0.697	128.4	82.1	103.6	105.9	86.1	102.2	91.7	96.1	105	88.3	99.3	119.2	86.7	105.4	95.7	87.7
FALSE	High	Master Protein	Q9HBL0	Tensin-1 OS=Homo sapiens GN=TNS1 PE=1 SV=2	0	60.374	11.7579	12	97	12	1	1735	185.586	7.75	Phospho [S338(100); S794(100); T860(98.3); S899(100); S963(100); S1177(99.9); T1189(99.9); S1192(100); S1269(100); S1381(99.3)]	0.986	0.956	0.871	0.701	1.03	0.804	1.247	1.223	1.114	1.167	0.94	1.01	0.881	1.22	0.809	1.18	0.846	0.748	102.4	129.6	91.6	83.6	104.9	84	103.9	88.5	113.2	112.9	80.6	103.1	109.2	92.6	112.1	127
FALSE	High	Master Protein	E7EX17	Eukaryotic translation initiation factor 4B OS=Homo sapiens GN=EIF4B PE=1 SV=1	0	59.0636	14.4481	6	66	6	1	616	69.657	5.67	Phospho [S422(100); S503(99); S602(100)]	1.02	1.326	0.814	1.032	0.594	1.358	1.031	1.065	1.366	0.761	1.355	0.93	1.418	0.732	1.185	0.835	1.188	0.913	89.9	90.9	125	119.7	82	104.4	88.1	130	104.5	71.8	79.8	134	81.8	98.1	60.8	77.9
FALSE	High	Master Protein	Q9P1Y6	PHD and RING finger domain-containing protein 1 OS=Homo sapiens GN=PHRF1 PE=1 SV=3	0	59.0523	10.5518	14	50	14	1	1649	178.557	8.95	Phospho [S867(100); S915(99.9); S936(100); S973(100); S1124(100); S1142(100); S1165(100); S1202(100); S1229(100); S1371(93.8)]	0.857	1.059	1.023	1.057	0.789	1.089	1.011	1.069	0.913	0.906	0.929	0.868	1.004	0.931	1.119	0.927	0.987	1.158	86.4	101.8	101.1	109.7	87.5	112.7	100.7	107.1	108.1	94.2	103.5	92.3	93.7	101.1	80.9	93
FALSE	High	Master Protein	P06748	Nucleophosmin OS=Homo sapiens GN=NPM1 PE=1 SV=2	0	58.8477	47.619	9	47	9	1	294	32.555	4.78	Phospho [S70(100); S125(100); S254(100)]	0.981	1.115	1.227	1.068	0.804	1.117	0.791	0.863	0.818	0.841	0.803	0.757	1.146	0.843	1.141	0.828	1.432	0.957	99	79.9	115.7	112.8	76.5	115.2	101	116.6	90.3	88.2	128.3	85.6	86.6	104.6	81.5	85.3
FALSE	High	Master Protein	P21333	Filamin-A OS=Homo sapiens GN=FLNA PE=1 SV=4	0	58.3077	7.40461	11	64	10	1	2647	280.564	6.06	Phospho [S966(98.2); S2152(100); S2180(100); S2327(98.4)]	1.233	0.627	0.887	0.594	1.571	0.482	1	1.084	0.666	1.457	0.66	0.748	0.501	2.084	0.582	1.967	0.679	0.696	155.6	126.2	63.3	60.9	94.4	73.5	126.2	52.8	91.3	175.5	74.7	56.1	165.6	84.2	165.2	153.2
FALSE	High	Master Protein	P07900	Heat shock protein HSP 90-alpha OS=Homo sapiens GN=HSP90AA1 PE=1 SV=5	0	57.9864	17.3497	10	42	5	1	732	84.607	5.02	Phospho [S231(100); S263(100)]	0.961	0.657	0.856	0.751	1.703	0.87	0.665	0.766	0.551	2.042	0.728	0.703	0.829	0.859	0.893	0.832	0.913	0.853	113.6	78.7	98	102.9	83.1	105.6	118.3	83.3	97.1	108.9	108.5	69.9	105.5	126.8	149.2	178.9
FALSE	High	Master Protein	A0A0G2JIW1	Heat shock 70 kDa protein 1B OS=Homo sapiens GN=HSPA1B PE=1 SV=1	0	55.4177	25.5452	13	40	6	1	642	70.066	5.66	Phospho [S634(100)]	1.02	0.789	1.393	0.971	0.668	0.886	0.947	0.907	0.839	0.769	0.628	0.855	0.998	1.017	0.842	0.865	0.721	0.906	109	101.2	106.7	94.7	91.4	90	106.9	81.1	93.3	104.5	143.2	86.3	88.9	102.8	82.6	95.1
FALSE	High	Master Protein	P35580	Myosin-10 OS=Homo sapiens GN=MYH10 PE=1 SV=3	0	55.1009	4.8583	7	55	3	1	1976	228.858	5.54	Phospho [S1956(100); S1975(100)]	0.931	0.65	1.066	0.571	1.778	0.745	1.005	0.959	0.628	1.456	0.663	0.841	0.772	1.536	0.817	1.729	0.801	0.724	106.7	115.1	88.4	85.4	96.3	93.6	114.5	60.1	88.7	142.1	98.6	58.1	159.9	92.5	178	145.8
FALSE	High	Master Protein	O00264	Membrane-associated progesterone receptor component 1 OS=Homo sapiens GN=PGRMC1 PE=1 SV=3	0	54.9237	41.0256	5	105	4	1	195	21.658	4.7	Phospho [S57(100); S181(100)]	0.891	0.856	0.788	0.63	1.143	0.909	1.404	0.833	0.8	1.88	0.916	1.027	1.035	0.768	1.01	0.69	0.945	0.979	85.7	135.1	99.6	87.4	98.8	97.2	96.2	104.5	101.6	93.7	96.2	97.7	84.2	122.1	106.8	175.6
FALSE	High	Master Protein	B4DY08	Heterogeneous nuclear ribonucleoproteins C1/C2 OS=Homo sapiens GN=HNRNPC PE=1 SV=1	0	54.9132	29.1667	8	60	8	1	288	31.952	8.72	Phospho [S108(98.6); S149(100); S225(94.4); S247(100)]	0.959	0.933	1.48	1.376	0.53	1.18	1.149	0.94	1.294	0.915	1.133	1.051	1.154	0.748	1.168	0.798	1.315	1.549	87.6	105	105.4	107.8	96	106.7	91.4	90.8	91.4	72.9	144	125.9	77.7	97.3	47.5	81.9
FALSE	High	Master Protein	P05387	60S acidic ribosomal protein P2 OS=Homo sapiens GN=RPLP2 PE=1 SV=1	0	54.6307	67.8261	5	115	5	1	115	11.658	4.54	Phospho [S86(100); S105(100)]	0.779	1.724	0.626	1.178	0.911	0.954	0.949	0.848	0.978	1.58	1.273	1.129	1.078	0.553	1.259	0.637	1.237	1.345	76.3	93	105.5	93.4	110.5	123.3	97.9	189.5	93.2	60.8	68.8	107.5	70.1	109.9	74.8	129.8
FALSE	High	Master Protein	A0A0D9SGF6	Spectrin alpha chain, non-erythrocytic 1 OS=Homo sapiens GN=SPTAN1 PE=1 SV=1	0	53.8382	7.44596	15	41	15	1	2498	287.428	5.36	Phospho [S1217(100)]	0.931	0.75	0.991	1.04	0.654	1.059	1.067	1.05	0.806	1.183	1.086	1.044	1.059	0.815	1.108	0.976	1.136	1.971	89.7	102.8	102	102	100.5	106.7	96.3	82.2	115	89.3	108.6	88.3	107	109.6	56.7	102.6
FALSE	High	Master Protein	Q15149	Plectin OS=Homo sapiens GN=PLEC PE=1 SV=3	0	53.4756	3.99231	13	91	13	1	4684	531.466	5.96	Phospho [S720(100); S1435(100); S1721(100); S4382(100); S4386(100); S4406(100); S4613(100)]	0.91	0.782	0.995	0.78	1.536	0.909	0.963	0.908	0.779	1.103	0.887	0.877	0.821	1.077	0.962	1.023	0.989	1.048	98.8	104.6	89.2	98.8	95.3	104.5	108.7	83.4	96.8	114.9	106.1	83.1	109.1	106.6	146.5	105.1
FALSE	High	Master Protein	Q5TCU3	Tropomyosin beta chain OS=Homo sapiens GN=TPM2 PE=1 SV=1	0	52.7458	50.7042	16	44	5	1	284	32.795	4.68	Phospho [S87(100)]	0.618	0.919	0.826	0.836	0.629	0.63	0.687	1.236	0.92	0.841	0.809	0.613	0.536	1.444	0.919	1.522	0.751	0.796	86.5	96.1	75	88.1	85.8	128.5	139.9	81.8	110	128.5	73.5	81.9	135.4	89	77.8	104
FALSE	High	Master Protein	H0Y449	Nuclease-sensitive element-binding protein 1 (Fragment) OS=Homo sapiens GN=YBX1 PE=1 SV=1	0	52.4973	27.2727	7	46	7	1	374	41.99	10.43	Phospho [S224(100)]	1.013	1.77	1.203	1.65	0.644	1.14	0.925	0.897	1.244	0.92	0.94	0.828	1.105	0.83	1.123	0.81	1.008	1.239	99.4	90.8	108.4	111.9	81.2	110.2	98.1	159.8	81	74.9	108.6	112.3	73.1	90.3	60.9	87
FALSE	High	Master Protein	E9PGZ1	Caldesmon OS=Homo sapiens GN=CALD1 PE=1 SV=1	0	52.3341	25.9328	12	46	3	1	536	61.669	6.11	Phospho [S125(96.4); S196(100)]	0.973	0.943	0.752	0.666	0.717	0.85	1.248	1.176	1.161	0.82	0.991	0.968	0.85	1.2	0.812	1.234	0.594	0.607	101.6	130.3	88.8	88.8	101.1	84.8	104.5	88.4	110.2	112.5	70.5	108.8	115.7	93.7	93	106.5
FALSE	High	Master Protein	P29966	Myristoylated alanine-rich C-kinase substrate OS=Homo sapiens GN=MARCKS PE=1 SV=4	0	52.0538	37.3494	7	67	7	1	332	31.536	4.45	Phospho [S27(98); S101(100); S134(82.9); T150(100); S170(100)]	0.868	1.123	1.388	1.187	0.695	1.186	0.939	1.014	1.03	0.878	0.932	0.872	0.786	0.99	1.075	0.996	1.225	0.83	90.3	97.7	81.8	123.4	90.7	111.9	104.1	104.3	94.1	91.9	128.8	95.6	92.4	92.8	72.1	91.1
FALSE	High	Master Protein	A0A087WUZ3	Spectrin beta chain OS=Homo sapiens GN=SPTBN1 PE=1 SV=1	0	49.0156	4.77599	9	67	9	1	2366	274.659	5.57	Phospho [S1388(100); S2104(100); S2130(100); S2163(97.9); S2167(100)]	1.139	0.819	1.107	0.93	0.689	0.891	1.227	1.026	0.656	1.211	0.72	1.05	0.972	1.124	0.952	1.409	0.822	0.916	110.3	118.8	94.1	86.3	101.6	92.1	96.8	80.3	100.6	110.2	108.5	64.3	138.1	98	76.7	134.8
FALSE	High	Master Protein	U3KQK0	Histone H2B OS=Homo sapiens GN=HIST1H2BN PE=1 SV=1	0	48.198	47.5904	10	54	10	1	166	18.792	10.54	Phospho [S113(100)]	0.907	0.796	1.631	1.155	0.44	1.003	1.418	1.216	0.879	1.067	1.133	1.16	1.022	1.099	1.179	1.177	1.25	1.294	82.6	129.1	93	91.3	105.6	107.4	91	71.5	109.2	98.7	146.4	78.9	105.6	89.8	41.9	101.7
FALSE	High	Master Protein	H7BXR3	Sorbin and SH3 domain-containing protein 2 (Fragment) OS=Homo sapiens GN=SORBS2 PE=1 SV=1	0	47.5538	17.6101	8	147	8	1	636	70.132	9.6	Phospho [S9(100); S200(98.6); S306(100); S377(100); T395(98.1)]	0.855	0.881	0.77	0.666	0.603	1.02	1.453	1.148	1.567	0.993	1.568	1.247	0.944	0.786	1	0.854	0.518	0.756	79.6	135.3	87.9	95	116.1	93.1	93.1	88	114.7	78.6	77	156.5	85.4	99.9	69.1	113.9
FALSE	High	Master Protein	O60716	Catenin delta-1 OS=Homo sapiens GN=CTNND1 PE=1 SV=1	0	46.9298	10.5372	8	51	8	1	968	108.103	6.23	Phospho [S230(98.6); S252(100); S268(98.5); S288(100); S349(100); S352(100); S857(100)]	1.169	0.84	0.774	0.721	0.558	1.069	1.441	1.159	0.773	1.323	1.136	1.19	1.208	0.689	1.129	0.711	0.738	1.209	99.7	122.9	103.1	91.2	101.5	96.3	85.3	98.9	136.5	81.1	91.1	91	83.7	117.7	58.5	138.5
FALSE	High	Master Protein	Q9BX66	Sorbin and SH3 domain-containing protein 1 OS=Homo sapiens GN=SORBS1 PE=1 SV=3	0	46.8959	9.67492	10	90	6	1	1292	142.426	6.84	Phospho [S89(100); S240(96.7); S326(100); S350(100); S465(98.2); S556(100); S665(100)]	0.944	1.13	0.874	0.577	0.72	0.71	1.49	1.056	1.079	0.901	0.918	1.013	0.766	1.08	0.762	1.086	0.691	0.66	98.8	156	80.3	74.4	106	79.8	104.7	108.3	101.2	103.5	83.7	103.3	104.1	95.8	92.2	115.3
FALSE	High	Master Protein	Q8NE71	ATP-binding cassette sub-family F member 1 OS=Homo sapiens GN=ABCF1 PE=1 SV=2	0	46.5004	12.071	9	32	3	1	845	95.866	6.8	Phospho [S22(98.2); S109(97.5); S166(100); S228(100)]	1.03	1.155	1.204	1.316	0.458	1.025	0.825	1.009	1.02	0.853	1.191	0.803	1.102	0.838	1.092	0.893	1.229	1.092	104.9	84	112.2	104.3	81.7	111.1	101.8	113.6	99.2	82.4	118.3	100.3	87.8	98.3	44.9	83.6
FALSE	High	Master Protein	H0Y9Y3	Synaptopodin-2 (Fragment) OS=Homo sapiens GN=SYNPO2 PE=1 SV=1	0	46.2487	14.7186	7	80	7	1	1155	125.285	8.56	Phospho [S556(96.3); S681(99.6); S854(98.8)]	1.039	0.712	0.696	0.712	1.751	0.589	1.098	1.065	0.769	1.19	0.671	0.764	0.65	1.74	0.593	1.671	0.549	0.625	126.9	134	79.3	72	93.3	72.4	122.1	65.1	97.4	159.2	63.6	70.3	152.9	91.5	188.6	128.2
FALSE	High	Master Protein	P04406	Glyceraldehyde-3-phosphate dehydrogenase OS=Homo sapiens GN=GAPDH PE=1 SV=3	0	46.0442	42.9851	11	38	11	1	335	36.03	8.46	Phospho [T184(97.9)]	1.04	0.868	0.947	1.055	0.592	1.411	1.024	1.181	1.172	0.916	1.381	1.152	1.127	1.017	1.39	1.045	1.231	1.345	89.4	88	96.9	121.2	99	119.5	86	84.1	114.3	98.4	91.7	113.5	101.2	96.8	55.1	85.2
FALSE	High	Master Protein	P02671	Fibrinogen alpha chain OS=Homo sapiens GN=FGA PE=1 SV=2	0	45.5508	17.321	11	47	11	1	866	94.914	6.01	Phospho [S45(100)]	1.385	0.714	1.328	0.616	1.309	0.452	0.763	0.874	0.942	0.936	0.643	0.922	0.968	2.359	0.532	1.155	1.214	0.652	161	88.7	112.5	52.5	107.1	61.8	116.3	59.7	73	197.2	111	78.7	96.6	83.6	143.8	102.8
FALSE	High	Master Protein	P07148	Fatty acid-binding protein, liver OS=Homo sapiens GN=FABP1 PE=1 SV=1	0	44.9721	55.1181	6	50	6	1	127	14.199	7.18	Phospho [S11(100); S56(100)]	1.036	0.562	0.544	0.428	0.808	0.697	0.787	1.696	2.748	1.629	1.758	1.678	1.754	0.813	0.691	0.756	0.661	0.462	94.9	72.1	160.6	63.8	153.7	63.3	91.6	48.5	146.2	70.1	46.9	236.9	65.2	86.2	83.8	169.1
FALSE	High	Master Protein	P61978	Heterogeneous nuclear ribonucleoprotein K OS=Homo sapiens GN=HNRNPK PE=1 SV=1	0	44.1295	28.5097	10	53	10	1	463	50.944	5.54	Phospho [S284(100); S379(100)]	0.956	1.402	1.077	0.74	0.549	1.304	0.943	1.021	1.206	1.15	1.065	1.047	1.233	0.749	1.145	0.845	0.877	0.835	87.8	86.5	113.1	119.7	96.1	105.1	91.8	134.5	97.9	71.8	103.3	115.7	81	95.9	61.8	129.5
FALSE	High	Master Protein	P68363	Tubulin alpha-1B chain OS=Homo sapiens GN=TUBA1B PE=1 SV=1	0	42.2521	24.1685	8	28	2	1	451	50.12	5.06	Phospho [T51(94.7)]	1.133	0.862	1.191	0.779	1.541	0.927	1.008	0.941	0.737	1.74	0.734	0.822	0.954	1.029	0.982	0.967	0.957	0.784	116.2	103.4	97.8	95	84.3	100.7	102.6	89.7	97.9	107.1	124	76.6	100.7	104.1	143.2	161.7
FALSE	High	Master Protein	P33241	Lymphocyte-specific protein 1 OS=Homo sapiens GN=LSP1 PE=1 SV=1	0	42.2186	24.1888	4	52	4	1	339	37.169	4.74	Phospho [S111(100); S252(100)]	1.435	0.82	0.932	0.954	1.06	0.55	1.237	1.198	1.077	1.315	0.783	1.059	0.842	0.991	0.765	0.935	1.11	0.68	145.8	125.7	85.6	55.9	107.6	77.7	101.6	82.6	120.6	99.8	93.8	108.4	94.1	100.7	107.5	133.4
FALSE	High	Master Protein	P60174	Triosephosphate isomerase OS=Homo sapiens GN=TPI1 PE=1 SV=3	0	40.7145	29.3706	8	45	8	1	286	30.772	5.92	Phospho [S58(100); S249(100)]	0.957	1.011	0.883	0.891	0.629	1.035	1.162	1.124	1.608	0.994	2.32	1.616	1.029	0.877	1.021	0.828	0.776	0.495	85.6	104	92.1	92.7	144.7	91.4	89.5	96.5	107.3	83.8	84.4	153.5	79	95.5	61.9	97.9
FALSE	High	Master Protein	Q5STZ8	ATP-binding cassette sub-family F member 1 (Fragment) OS=Homo sapiens GN=ABCF1 PE=1 SV=9	0	40.5893	25.9587	8	27	2	1	339	38.296	5.87	Phospho [S22(98.2); S110(97.5); S167(100); S229(100)]	1.698	2.298	1.684	1.232	0.378	1.572	1.237	1.348	1.534	0.436	1.174	0.971	1.527	1.249	1.592	0.823	0.814	0.743	123.8	90.2	111.4	114.7	70.8	116.1	72.9	161.9	94.9	88	118.7	108.1	58	70.4	45.8	52.8
FALSE	High	Master Protein	Q05682	Caldesmon OS=Homo sapiens GN=CALD1 PE=1 SV=3	0	40.1693	17.9067	10	33	1	1	793	93.175	5.66	Phospho [S131(96.4); S202(100)]	0.673	0.7	0.754	0.481	1.359	0.625	0.965	0.629	0.839	2.108	0.742	0.845	0.672	2.176	0.59	1.917	0.655	0.562	87.8	125.8	87.5	81.5	110.2	76.9	130.3	61.1	55	190	65.8	73.2	167.4	87.3	137.7	213.6
FALSE	High	Master Protein	Q1KMD3	Heterogeneous nuclear ribonucleoprotein U-like protein 2 OS=Homo sapiens GN=HNRNPUL2 PE=1 SV=1	0	40.0062	4.81928	4	35	4	1	747	85.052	4.91	Phospho [T165(97.4); S185(100)]	0.973	0.961	0.947	1.267	0.755	0.942	0.932	0.955	0.849	1.025	0.915	0.864	0.918	0.826	1.072	0.895	1.048	1.504	101.6	97.4	95.9	98.4	90.3	112	104.4	104.6	103.9	89.9	103.1	92.4	97.4	108.8	70.3	95.5
FALSE	High	Master Protein	P46937	Transcriptional coactivator YAP1 OS=Homo sapiens GN=YAP1 PE=1 SV=2	0	38.7326	20.6349	5	47	5	1	504	54.427	5.17	Phospho [S61(100); S164(99); S381(95.8)]	1.03	1.389	0.792	0.806	1.511	0.767	1.021	0.917	1.672	1.596	0.874	0.785	0.875	1.005	0.684	0.769	0.751	0.434	117	116	99.4	87.2	89.2	77.7	113.6	128.9	85.1	93.3	73.5	155.2	71.3	92.8	151.7	160.3
FALSE	High	Master Protein	Q15424	Scaffold attachment factor B1 OS=Homo sapiens GN=SAFB PE=1 SV=4	0	38.7235	12.5683	6	36	6	1	915	102.58	5.47	Phospho [S344(100); S604(100); S617(100)]	0.779	1.13	1.881	1.184	0.926	1.583	0.9	0.976	1.052	1.012	1.187	0.958	0.968	0.857	1.203	0.831	1.213	1.445	73.7	85.3	91.7	149.9	90.8	113.9	94.7	102.4	88.4	77.6	170.4	95.3	75.3	90.6	81.4	88.9
FALSE	High	Master Protein	Q07954	Prolow-density lipoprotein receptor-related protein 1 OS=Homo sapiens GN=LRP1 PE=1 SV=2	0	38.5438	3.91725	10	23	10	1	4544	504.276	5.39	Phospho [S4520(100)]	0.964	0.92	1.186	0.579	1.381	0.692	0.895	1.125	0.829	1.349	0.68	0.742	0.887	1.077	0.732	1.098	0.989	0.762	114.1	106	105	82	87.8	86.7	118.4	89	108.8	104.2	114.8	80.2	106.2	96.7	143.5	140.1
FALSE	High	Master Protein	Q9UKV3	Apoptotic chromatin condensation inducer in the nucleus OS=Homo sapiens GN=ACIN1 PE=1 SV=2	0	38.2843	10.1417	9	39	8	1	1341	151.771	6.43	Phospho [S216(100); S243(100); S328(100); S478(99.9); S490(100); S710(100); S838(100); S1004(100)]	0.774	1.272	1.179	1.196	0.667	0.937	1.115	1.07	1.095	0.784	1.029	1.309	0.979	0.969	0.914	0.964	1.211	1.291	77.1	111.1	97.5	93.3	130.4	91	99.6	118	99.2	89.9	109.3	101.5	89.4	92.7	65.1	76.5
FALSE	High	Master Protein	Q13263	Transcription intermediary factor 1-beta OS=Homo sapiens GN=TRIM28 PE=1 SV=5	0	37.8109	14.2515	5	48	5	1	835	88.493	5.77	Phospho [S41(98.4); S473(100); S594(100)]	0.983	0.911	1.162	0.649	1.45	1.009	1.032	0.868	0.796	1.311	1.15	0.814	0.867	1.003	0.915	0.968	0.726	0.642	104	109.1	91.7	106.7	86.1	96.7	105.7	95	90.6	104.6	121.3	83.1	101	104.4	146.5	132.4
FALSE	High	Master Protein	Q13185	Chromobox protein homolog 3 OS=Homo sapiens GN=CBX3 PE=1 SV=4	0	36.804	29.5082	5	45	5	1	183	20.798	5.33	Phospho [S93(96.4); S176(100)]	0.915	1.376	1.505	1.025	0.522	1.135	1.022	0.953	1.003	1.122	0.902	1.076	1.14	0.803	1.019	0.985	0.97	1.075	87.7	97.9	109.2	108.7	103.1	97.6	95.8	126.3	87.5	73.7	138.1	92.1	90.4	91.8	55.3	118.7
FALSE	High	Master Protein	Q9UHB6	LIM domain and actin-binding protein 1 OS=Homo sapiens GN=LIMA1 PE=1 SV=1	0	36.7002	16.8643	8	50	8	1	759	85.173	6.84	Phospho [S132(100); S362(95.2); S374(100); S490(100); S617(97.4); S686(99.9); S698(100)]	0.847	1.189	0.903	1.18	0.283	1.08	0.911	1.045	1.119	0.724	1.019	0.879	0.808	0.889	1.073	0.933	0.862	1.061	89.8	96.7	85.7	114.6	93.2	113.9	106.1	117.6	103.4	87.9	89.3	110.6	92.3	98.9	32.3	82.7
FALSE	High	Master Protein	Q8IUX7	Adipocyte enhancer-binding protein 1 OS=Homo sapiens GN=AEBP1 PE=1 SV=1	0	36.6054	7.85838	5	24	5	1	1158	130.847	5.11	Phospho [T228(100)]	0.52	0.604	0.733	0.63	3.471	0.192	0.343	0.531	0.461	1.19	0.814	0.356	0.438	1.041	0.29	0.595	0.83	0.728	115.9	76.5	97.8	42.8	79.5	64.6	223	85.2	74.8	146.8	103.3	65	83.9	141	280.4	96.1
FALSE	High	Master Protein	Q6PKG0	La-related protein 1 OS=Homo sapiens GN=LARP1 PE=1 SV=2	0	36.4471	13.5036	8	33	8	1	1096	123.434	8.82	Phospho [S90(100); S521(100); S548(100); S627(100); S631(100); S774(100)]	1.148	0.849	1.093	0.758	0.707	0.979	0.946	1.282	0.794	1.085	0.709	0.833	1.269	0.976	1.115	1.063	0.929	0.859	110.3	90.8	121.8	94	80	107.1	96	84.2	127.2	96.8	108.4	78.7	105.4	99.2	81.9	125.6
FALSE	High	Master Protein	P04792	Heat shock protein beta-1 OS=Homo sapiens GN=HSPB1 PE=1 SV=2	0	36.1752	50.2439	10	76	10	1	205	22.768	6.4	Phospho [S15(100); S82(100); S187(100)]	1.041	0.933	0.715	0.614	0.436	1.702	1.199	0.992	1.68	1.145	1.325	1.142	0.824	1.199	1.379	1.38	0.886	0.385	87.9	101.3	69.6	143.8	96.4	116.5	84.5	82.7	87.9	106.3	63.4	148.9	122.3	88.6	52.7	138.4
FALSE	High	Master Protein	P51991	Heterogeneous nuclear ribonucleoprotein A3 OS=Homo sapiens GN=HNRNPA3 PE=1 SV=2	0	35.6716	17.9894	6	75	5	1	378	39.571	9.01	Phospho [S358(100)]	1.008	1.127	1.34	1.57	0.605	1.03	0.975	0.975	1.013	0.803	0.93	0.863	1.072	0.856	0.969	0.944	0.956	1.514	102	98.7	108.5	104.3	87.3	98	101.2	108.7	94.1	82.6	129.3	97.7	91.1	96.5	57.4	76.2
FALSE	High	Master Protein	P62995	Transformer-2 protein homolog beta OS=Homo sapiens GN=TRA2B PE=1 SV=1	0	35.6336	10.7639	6	44	6	1	288	33.646	11.25	Phospho [S22(100); S95(100); S99(100); S264(100); S266(100)]	0.929	1.05	1.078	1.468	0.476	1.303	1.05	1.292	0.872	0.833	1.281	1.08	1.083	0.877	1.395	0.99	1.282	2.208	82.9	93.8	96.7	116.3	96.5	124.5	89.3	102.7	126.3	85.7	105.4	85.3	96.8	97.8	39	68.2
FALSE	High	Master Protein	A0A0D9SFB5	Alcohol dehydrogenase 4 OS=Homo sapiens GN=ADH4 PE=1 SV=1	0	35.5011	25.0639	8	33	8	1	391	41.571	7.91	Phospho [S278(98.8)]	0.731	0.622	0.719	0.655	0.542	0.586	1.144	1.514	2.015	0.737	3.249	2.305	0.878	0.795	0.527	0.835	0.664	0.581	71.4	111.7	85.7	57.2	225	51.4	97.6	58	141.3	74.2	67.1	188.1	77.9	93.3	51.1	69.4
FALSE	High	Master Protein	Q86UE4	Protein LYRIC OS=Homo sapiens GN=MTDH PE=1 SV=2	0	34.7949	19.0722	8	37	8	1	582	63.799	9.32	Phospho [S298(100); S311(100); S426(100); S494(96.5); S568(100)]	1.019	2.116	0.962	0.961	0.74	1.071	0.884	0.967	1.728	0.916	1.209	0.959	0.903	0.823	0.948	0.81	1.085	0.824	105.2	91.2	93.2	110.5	98.9	97.8	103.2	176.2	80.5	68.6	80.1	143.9	67.5	83.3	76.9	95.2
FALSE	High	Master Protein	Q8N3V7	Synaptopodin OS=Homo sapiens GN=SYNPO PE=1 SV=2	0	33.9085	9.58019	6	48	6	1	929	99.402	8.72	Phospho [S263(100); S685(100); S754(100); S833(100)]	1.009	1.222	1.034	0.987	0.731	0.957	1.064	1.164	1.129	0.904	0.787	0.892	0.994	1.059	0.921	1.014	1.028	0.912	103.3	108.9	101.8	98	91.3	94.3	102.4	112.3	106.9	97.2	94.9	103.7	93.1	91.8	80.6	99.6
FALSE	High	Master Protein	F5H5D3	Tubulin alpha chain OS=Homo sapiens GN=TUBA1C PE=1 SV=1	0	33.462	19.0751	7	31	1	1	519	57.693	5.07	Phospho [T121(94.7)]	1.104	1.114	1.009	0.719	1.714	0.855	0.782	0.875	0.816	1.527	0.79	0.739	0.94	1.12	1.138	0.868	1.121	0.967	117.9	83.5	100.3	91.2	78.9	121.5	106.7	114.7	90	115.2	103.8	84	89.4	102.9	153.1	136.4
FALSE	High	Master Protein	Q5T200	Zinc finger CCCH domain-containing protein 13 OS=Homo sapiens GN=ZC3H13 PE=1 SV=1	0	32.9046	7.55396	11	46	11	1	1668	196.519	9.42	Phospho [S77(100); S198(100); S207(100); S209(100); T263(100); S265(100); S325(100); S370(100); S372(100); S877(99.3); S993(100); S1279(98.7)]	0.942	0.956	1.455	1.008	0.527	1.025	1.029	1.017	0.986	0.826	0.935	0.959	1.016	0.965	1.017	0.908	1.092	1.122	94.4	103	101.8	102.7	96	101.9	100.2	91.8	97.7	92.7	139.8	94.7	87.2	96.1	56.6	88.8
FALSE	High	Master Protein	O43493	Trans-Golgi network integral membrane protein 2 OS=Homo sapiens GN=TGOLN2 PE=1 SV=2	0	32.6851	20.625	7	37	7	1	480	51.082	5.73	Phospho [S68(92.2); T296(97.1); S347(98)]	1.17	2.098	1.036	0.802	0.913	0.899	1.081	2.548	1.44	1.251	0.924	1.013	1.08	2.1	0.976	1.669	0.799	0.88	113.5	104.8	104.8	87.2	98.2	94.6	97	123.5	150	123.6	61	84.8	98.3	58.9	97.2	133.3
FALSE	High	Master Protein	E7EVA0	Microtubule-associated protein OS=Homo sapiens GN=MAP4 PE=1 SV=1	0	32.6315	4.26643	7	51	7	1	2297	245.292	6.23	Phospho [S297(98.1); S524(100); T538(100); S653(100); S2218(100); S2296(97.9)]	1.23	1.812	0.744	0.753	0.782	1.779	0.83	0.981	1.341	0.92	0.902	0.878	1.217	0.785	1.418	0.684	0.769	0.608	103.1	69.6	102	149.1	73.6	118.8	83.8	172.6	93.5	74.8	70.8	127.8	65.2	95.3	95.4	112.4
FALSE	High	Master Protein	Q96JY6	PDZ and LIM domain protein 2 OS=Homo sapiens GN=PDLIM2 PE=1 SV=1	0	32.491	24.7159	5	57	5	1	352	37.436	8.72	Phospho [S134(100); S161(100); S197(100); S266(100)]	0.885	1.25	0.788	0.736	1.259	0.769	1.081	0.987	1.113	1.158	1.277	1.06	0.845	0.871	0.772	0.864	0.938	0.684	96.6	118	92.3	83.9	115.7	84.3	109.2	127.3	100.5	88.7	80.3	113.3	88	101.8	125	114.9
FALSE	High	Master Protein	A0A087WYT3	Prostaglandin E synthase 3 OS=Homo sapiens GN=PTGES3 PE=1 SV=1	0	32.4828	44.5122	4	31	4	1	164	19.143	4.55	Phospho [S117(100)]	0.896	1.038	0.774	1.004	1.192	1.231	0.777	0.918	0.789	2.317	1.182	1.024	1.037	0.711	1.126	0.66	0.808	1.073	88.5	76.7	102.4	121.5	101	111.2	98.7	123.3	109.1	84.5	92	93.7	78.5	118.9	97.3	189.1
FALSE	High	Master Protein	Q13427	Peptidyl-prolyl cis-trans isomerase G OS=Homo sapiens GN=PPIG PE=1 SV=2	0	32.3454	4.11141	7	45	7	1	754	88.564	10.29	Phospho [S356(100); T358(100); S415(100); S687(100)]	0.933	1.453	1.272	1.464	0.443	1.111	0.949	0.977	1.053	0.657	0.799	0.899	1.423	0.703	1.033	0.866	1.3	1.497	88.9	90.4	135.5	105.9	85.7	98.4	95.3	138.9	93.4	67.1	121.6	100.6	82.8	95.6	43.3	64.2
FALSE	High	Master Protein	P46821	Microtubule-associated protein 1B OS=Homo sapiens GN=MAP1B PE=1 SV=2	0	32.2106	4.49757	8	35	8	1	2468	270.468	4.81	Phospho [S832(100); S1265(100); S1501(100); S1793(100); S1797(98.1); S1852(100)]	1.028	0.856	0.992	0.687	0.902	0.739	0.809	0.778	0.795	1.042	0.709	0.787	0.843	1.501	0.815	1.326	0.802	0.89	119.5	94	98	85.9	91.5	94.7	116.3	82.7	75.1	145	95.8	76.8	128.1	96.6	104.7	120.9
FALSE	High	Master Protein	P06702	Protein S100-A9 OS=Homo sapiens GN=S100A9 PE=1 SV=1	0	32.1937	42.9825	3	24	3	1	114	13.234	6.13	Phospho [T113(100)]	0.865	0.67	0.754	0.933	1.029	0.522	0.912	1.083	0.812	1.128	1.066	0.939	0.577	1.192	0.641	0.972	3.073	0.863	111	117	74	67	120.4	82.3	128.3	72.3	116.9	128.7	81.4	87.7	105	108	79.2	86.9
FALSE	High	Master Protein	Q15365	Poly(rC)-binding protein 1 OS=Homo sapiens GN=PCBP1 PE=1 SV=2	0	32.071	16.0112	4	53	2	1	356	37.474	7.09	Phospho [S173(100)]	1.278	0.81	0.992	0.984	1.917	0.93	1.059	0.754	0.811	1.671	0.677	0.942	1.251	0.884	1.022	0.742	1.002	0.949	119.6	99.1	117	87	88.1	95.6	93.6	94.6	88.1	103.3	115.8	94.8	86.7	116.8	163.6	142.7
FALSE	High	Master Protein	P15924	Desmoplakin OS=Homo sapiens GN=DSP PE=1 SV=3	0	31.7481	3.16963	6	39	6	1	2871	331.569	6.81	Phospho [S22(100); S53(100); S176(100); S2589(100); S2825(100)]	1.329	1.703	0.66	0.406	0.949	0.91	1.108	0.996	0.845	1.287	0.769	0.928	1.165	0.664	0.968	0.733	0.581	0.597	125.5	104.7	110.1	86	87.7	91.5	94.5	180.6	105.6	70.4	70	89.6	77.7	106.1	118.8	161.2
FALSE	High	Master Protein	Q9P2M7	Cingulin OS=Homo sapiens GN=CGN PE=1 SV=2	0	31.2467	8.5213	6	35	6	1	1197	136.304	5.54	Phospho [S134(100); S159(100); S252(100)]	1.122	1.038	1.048	0.751	0.827	0.882	1.109	1.06	1.02	1.041	0.938	0.93	1.097	1.062	0.849	1.051	1.071	0.894	112.4	111.1	109.9	88.3	93.2	85	100.2	99.8	102	102.1	100.8	98.1	101.1	96.2	88.7	111.7
FALSE	High	Master Protein	P19338	Nucleolin OS=Homo sapiens GN=NCL PE=1 SV=3	0	31.1099	13.9437	8	28	8	1	710	76.568	4.7	Phospho [S67(100)]	1.088	0.797	1.127	1.237	0.549	1.003	0.948	0.92	0.758	0.856	0.789	0.859	1.237	0.857	1.022	0.951	0.951	1.125	106.4	92.7	121	98.1	84	100	97.8	87	100.5	93.6	123.1	82.8	103.8	109.2	59	92.1
FALSE	High	Master Protein	G3V1L9	Tight junction protein 1 (Zona occludens 1), isoform CRA_a OS=Homo sapiens GN=TJP1 PE=1 SV=1	0	30.8406	9.10633	9	27	9	1	1768	197.339	6.67	Phospho [S125(96.3); S131(96.3); S280(97.3); S297(100); S313(96.8); S315(100); S617(98.7); S912(100); S1111(99.9); S1617(99.9)]	1.02	0.871	0.941	0.669	1.675	1.126	1.218	1.063	0.889	1.27	0.871	1.046	1.059	0.953	1.11	0.816	1.064	0.673	94.2	112.5	97.8	104	96.6	102.5	92.4	93.4	113.9	102.1	100.8	95.2	87.4	107.2	162.3	123.1
FALSE	High	Master Protein	Q9H307	Pinin OS=Homo sapiens GN=PNN PE=1 SV=4	0	29.875	12.6918	8	29	8	1	717	81.565	7.14	Phospho [S66(100); S100(100); S381(100); S443(100); S690(100)]	0.881	0.706	1.398	0.911	0.546	1.083	1.025	0.793	0.794	0.888	0.94	0.973	0.804	0.77	1.177	0.718	1.04	1.249	88.8	103.4	81.1	109.1	98.1	118.6	100.8	79.9	89.8	87.2	158.4	90	81.3	113.3	58.1	94.5
FALSE	High	Master Protein	E7ETY2	Treacle protein OS=Homo sapiens GN=TCOF1 PE=1 SV=1	0	29.7675	6.45161	8	37	8	1	1488	152.213	8.85	Phospho [S233(95.8); S328(99.2); S381(100); T533(100); S1228(98.4); S1350(100); S1378(100)]	1.244	1.194	1.457	0.835	0.397	1.322	0.81	0.988	0.857	0.657	0.756	0.865	1.373	0.974	1.016	1.069	1.91	0.857	114.1	74.3	126	121.3	79.4	93.2	91.7	110.8	91.8	90.4	135.3	79.5	99.3	92.8	43.3	71.7
FALSE	High	Master Protein	P55081	Microfibrillar-associated protein 1 OS=Homo sapiens GN=MFAP1 PE=1 SV=2	0	29.3327	24.8292	6	24	6	1	439	51.927	4.98	Phospho [S52(100); S53(100); S116(100); T267(100)]	0.901	0.905	1.085	0.957	1.673	0.885	0.858	0.744	0.74	1.189	0.724	0.83	0.991	0.866	0.949	0.72	1.055	1.272	98.3	93.7	108.1	96.6	90.6	103.6	109.1	104.5	86	100	125.3	85.5	83.1	115.5	148.8	105.7
FALSE	High	Master Protein	P02452	Collagen alpha-1(I) chain OS=Homo sapiens GN=COL1A1 PE=1 SV=5	0	28.8618	12.8415	9	17	9	1	1464	138.857	5.8	Phospho [S720(100); S889(99.1); S1125(92.5)]	0.875	0.625	0.921	0.634	2.765	0.68	1.401	0.904	0.723	1.058	0.579	0.863	0.627	1.327	0.759	1.082	0.563	0.84	98.8	158	70.8	76.7	97.3	85.6	112.8	66.4	96.2	141.2	97.9	76.9	115.1	106.3	260.2	99.6
FALSE	High	Master Protein	Q14103	Heterogeneous nuclear ribonucleoprotein D0 OS=Homo sapiens GN=HNRNPD PE=1 SV=1	0	28.0075	15.493	4	25	4	1	355	38.41	7.81	Phospho [S190(100)]	0.972	1.298	1.181	1.248	0.394	1.078	1.16	0.987	1.056	0.85	1.066	1.009	1.18	0.827	1.252	0.903	0.998	1.393	88.9	106.1	108	98.6	92.3	114.6	91.5	125.3	95.2	79.8	114	101.9	87.2	96.5	39.7	85.7
FALSE	High	Master Protein	Q13283	Ras GTPase-activating protein-binding protein 1 OS=Homo sapiens GN=G3BP1 PE=1 SV=1	0	27.9543	14.1631	4	72	4	1	466	52.132	5.52	Phospho [S149(100); S250(100)]	0.972	1.485	0.955	1.108	0.844	1.215	0.812	0.732	0.734	0.991	0.834	0.766	1.118	0.683	1.12	0.633	0.994	0.84	97.1	81.2	111.8	121.4	76.6	112	99.9	167.1	82.4	76.8	107.4	82.6	71.2	112.5	89.4	104.9
FALSE	High	Master Protein	P63104	14-3-3 protein zeta/delta OS=Homo sapiens GN=YWHAZ PE=1 SV=1	0	27.833	30.6122	5	47	4	1	245	27.728	4.79	Phospho [T232(90.3)]	1.214	0.594	1.323	0.727	1.573	0.709	0.71	0.92	0.649	1.503	0.668	0.791	0.903	1.388	0.818	1.106	0.778	0.794	138.3	80.9	102.9	80.8	90.1	93.2	113.9	59.6	92.3	139.2	132.7	65	110.9	100.3	156.3	149.3
FALSE	High	Master Protein	P08621	U1 small nuclear ribonucleoprotein 70 kDa OS=Homo sapiens GN=SNRNP70 PE=1 SV=2	0	27.2799	15.3318	3	21	3	1	437	51.526	9.94	Phospho [S226(100); S320(100)]	0.907	1.061	1.015	1.128	0.598	0.971	0.93	0.916	0.855	0.795	0.838	0.83	1.045	0.913	0.982	0.921	1.152	1.233	95.2	97.7	109.7	102	87.2	103.1	105	111.1	96	95.7	106.3	89.6	96.5	104.8	62	82.5
FALSE	High	Master Protein	P42167	Lamina-associated polypeptide 2, isoforms beta/gamma OS=Homo sapiens GN=TMPO PE=1 SV=2	0	27.2067	12.5551	4	63	4	1	454	50.639	9.38	Phospho [T74(100); T160(98.2); S385(100)]	1.109	1.098	0.954	0.957	0.506	0.845	0.855	0.869	0.774	0.731	0.9	0.79	0.925	0.782	0.8	0.785	0.859	0.88	122.8	94.6	102.4	93.5	87.5	88.5	110.7	122.7	97.2	87.4	106.6	86.6	87.7	111.8	60.7	87.7
FALSE	High	Master Protein	Q12888	TP53-binding protein 1 OS=Homo sapiens GN=TP53BP1 PE=1 SV=2	0	27.1864	7.45436	8	39	8	1	1972	213.443	4.7	Phospho [S265(100); S380(94.8); S500(100); S727(100); T1056(98.8); S1462(97.5)]	0.976	0.711	0.969	0.789	1.091	0.783	0.842	0.811	0.839	1.074	0.794	0.731	0.977	1.224	0.862	0.888	1.412	0.891	110.7	95.6	110.8	88.9	82.9	97.8	113.4	77.3	88.1	133	105.3	91.2	96.5	108.6	108.3	106.6
FALSE	High	Master Protein	A0A0U1RQI5	Sorbin and SH3 domain-containing protein 1 (Fragment) OS=Homo sapiens GN=SORBS1 PE=1 SV=1	0	26.8113	11.2426	5	76	1	1	507	57.968	6.99	Phospho [S85(100); S138(100)]	0.274	2.182	0.66	1.15	0.298	0.4	0.543	1.302	1.125	0.661	1.089	0.441	0.275	0.759	0.397	1.134	0.896	1.048	57.6	114.1	57.9	84	92.7	83.4	210.2	187.1	111.7	65.1	56.6	96.5	97.2	85.8	33.9	75.4
FALSE	High	Master Protein	Q14247	Src substrate cortactin OS=Homo sapiens GN=CTTN PE=1 SV=2	0	26.399	8.90909	4	68	4	1	550	61.549	5.4	Phospho [T401(100); S426(100)]	1.065	1.237	0.878	0.97	0.786	1.004	1.007	0.998	1.197	0.995	0.891	0.901	0.958	1	0.953	0.947	0.883	0.893	108.2	102.3	97.3	102	91.5	96.9	101.6	119.3	96.2	96.4	84.7	115.5	91.4	96.5	85.7	108.5
FALSE	High	Master Protein	P13611	Versican core protein OS=Homo sapiens GN=VCAN PE=1 SV=3	0	26.2938	1.06007	3	36	3	1	3396	372.59	4.51	Phospho [S2941(100)]	0.801	0.626	0.848	0.513	2.545	0.455	0.551	0.598	0.603	0.611	0.424	0.468	0.445	2.435	0.55	1.873	0.588	0.713	131.3	90.4	72.9	74.7	76.7	90.1	164	54.9	52.4	213.5	74.4	52.9	164.2	87.7	278.7	66.9
FALSE	High	Master Protein	Q12797	Aspartyl/asparaginyl beta-hydroxylase OS=Homo sapiens GN=ASPH PE=1 SV=3	0	26.1934	12.2691	4	21	4	1	758	85.809	5.01	Phospho [S29(96.2)]	0.935	0.801	1.3	1.14	0.95	0.829	0.902	0.791	0.682	1.285	0.679	0.76	0.775	1.145	0.876	1.135	2.253	1.674	107.7	103.9	89.3	95.5	87.5	100.9	115.2	81.8	80.8	116.9	132.8	69.7	115.9	102.1	74	100.2
FALSE	High	Master Protein	P21796	Voltage-dependent anion-selective channel protein 1 OS=Homo sapiens GN=VDAC1 PE=1 SV=2	0	26.1835	26.5018	6	17	6	1	283	30.754	8.54	Phospho [S104(100)]	1.125	0.447	1.157	1.296	1.043	1.701	0.759	0.664	0.556	1.162	0.862	0.955	1.187	0.736	1.92	0.774	1.304	1.426	91.1	61.4	96.1	137.7	77.3	155.5	80.9	58.7	87.1	96.6	151.8	72.9	101.6	131.2	90.2	100.5
FALSE	High	Master Protein	O95210	Starch-binding domain-containing protein 1 OS=Homo sapiens GN=STBD1 PE=1 SV=1	0	26.1812	20.9497	5	39	5	1	358	38.983	5.73	Phospho [S145(100); S188(100); S210(99.1)]	1.002	0.576	0.878	0.419	0.734	0.866	1.866	1.29	1.289	1.56	2.087	1.606	0.88	0.576	0.95	0.626	0.508	0.402	85.8	159.9	75.4	74.2	137.6	81.4	85.7	64.7	144.8	64.6	98.6	144.7	70.3	112.3	76.5	162.8
FALSE	High	Master Protein	P13861	cAMP-dependent protein kinase type II-alpha regulatory subunit OS=Homo sapiens GN=PRKAR2A PE=1 SV=2	0	26.1025	14.1089	4	21	4	1	404	45.49	5.07	Phospho [S78(100); S99(100); S395(99.5)]	0.925	0.771	0.752	0.68	1.86	1.02	0.801	0.823	0.702	1.431	0.734	0.752	0.884	1.028	1.028	1.155	0.984	1.073	101	87.5	96.5	111.4	82.2	112.2	109.2	86.6	92.5	115.5	84.5	78.8	129.8	112.3	167.7	129
FALSE	High	Master Protein	P28290	Sperm-specific antigen 2 OS=Homo sapiens GN=SSFA2 PE=1 SV=3	0	26.0245	8.49881	8	21	8	1	1259	138.3	5.19	Phospho [S92(100); S270(100); S641(100); S668(100); S737(100); S739(100); S1134(100)]	0.924	0.783	0.896	0.87	1.133	0.838	1.128	1.042	1.097	0.954	1.048	0.998	0.891	1.015	0.788	0.986	0.859	1.016	98.5	120.3	95	89.3	106.4	84	106.6	80.4	107	104.2	91.9	112.6	101.2	102.6	115.3	97.1
FALSE	High	Master Protein	A8MXP9	Matrin-3 OS=Homo sapiens GN=MATR3 PE=1 SV=1	0	26.0147	6.25698	6	30	6	1	895	99.905	6.04	Phospho [S118(97.8); S188(100); S596(97.2); S598(97.2); S604(100)]	0.894	0.98	1.293	0.929	0.421	1.076	0.899	1.067	0.905	0.795	0.777	0.842	0.988	0.78	1.231	1.047	1.021	1.467	90.3	90.8	99.8	108.6	85.1	124.4	101	97	105.6	77.2	128	89.6	103.6	99	46	86.8
FALSE	High	Master Protein	P37802	Transgelin-2 OS=Homo sapiens GN=TAGLN2 PE=1 SV=3	0	25.7529	19.598	3	28	3	1	199	22.377	8.25	Phospho [S163(100)]	1.213	1.744	0.578	0.994	0.622	2.304	0.804	1.002	1.472	1.007	0.799	0.906	1.178	0.605	1.47	0.711	0.63	0.533	95.7	63.4	92.9	181.7	71.5	115.9	78.9	171.7	98.7	59.5	56.9	144.8	70	98.4	78	126.2
FALSE	High	Master Protein	P49006	MARCKS-related protein OS=Homo sapiens GN=MARCKSL1 PE=1 SV=2	0	25.7486	64.6154	5	18	5	1	195	19.517	4.67	Phospho [S104(100); T139(93.5); T148(100)]	0.789	1.065	1.228	1.456	1.454	1.912	0.919	0.852	0.896	0.797	1.08	0.914	0.555	0.834	1.134	0.786	0.778	1.049	76.4	89	53.8	185.3	88.6	109.9	96.9	111.9	89.5	87.6	129.1	94.2	82.6	105.1	133.7	73.3
FALSE	High	Master Protein	P09651	Heterogeneous nuclear ribonucleoprotein A1 OS=Homo sapiens GN=HNRNPA1 PE=1 SV=5	0	25.3142	22.043	7	29	5	1	372	38.723	9.13	Phospho [S6(98.4)]	0.817	1.065	1.535	1.363	0.448	1.302	0.924	0.929	0.968	0.803	0.751	0.898	1.045	0.701	1.301	0.927	0.916	1.473	78.5	88.8	100.4	125.1	86.3	125	96	104.7	91.2	68.9	150.8	95.1	91.1	98.2	46.5	83.2
FALSE	High	Master Protein	A6NDB9	Paralemmin-3 OS=Homo sapiens GN=PALM3 PE=1 SV=2	0	25.2107	11.2927	6	47	6	1	673	71.652	4.53	Phospho [T151(100); S260(100); S303(99.1); S375(100); S420(100)]	0.942	0.816	0.842	0.571	1.059	1.237	1.051	0.989	1.549	1.253	1.268	1.215	0.856	1.007	1.004	0.758	0.728	0.612	90.3	100.7	82	118.5	116.4	96.2	95.8	82.1	99.4	101.3	84.7	155.7	76.2	100.6	114.2	135.1
FALSE	High	Master Protein	G8JLB6	Heterogeneous nuclear ribonucleoprotein H OS=Homo sapiens GN=HNRNPH1 PE=1 SV=1	0	25.1769	15.4661	5	21	1	1	472	51.197	6.8	Phospho [S23(100); S104(100); S310(100)]	0.937	0.825	1.11	0.773	0.768	0.878	0.926	0.888	0.808	0.948	0.84	0.823	0.951	0.826	0.902	0.778	0.814	0.831	102.2	101	103.8	95.7	89.8	98.4	109.1	92.6	99.7	92.8	124.6	90.7	87.4	112.3	90	111.1
FALSE	High	Master Protein	Q13247	Serine/arginine-rich splicing factor 6 OS=Homo sapiens GN=SRSF6 PE=1 SV=2	0	25.1185	9.01163	6	57	6	1	344	39.563	11.43	Phospho [S259(100); S303(100); S314(100); S316(100)]	0.887	1.138	1.218	1.349	0.685	1.218	1.08	1.113	0.978	0.989	1.125	1.048	1.239	0.735	1.167	0.912	1.029	1.321	81.3	99	113.6	111.6	96	106.9	91.6	112.3	109.9	72.5	120.2	96.5	90	98.7	63.9	92.3
FALSE	High	Master Protein	Q9H6F5	Coiled-coil domain-containing protein 86 OS=Homo sapiens GN=CCDC86 PE=1 SV=1	0	25.0305	23.3333	5	28	5	1	360	40.211	10.33	Phospho [S18(100); S91(100); S113(98.5); S217(100)]	0.844	1.066	1.21	1.266	1.527	1.151	0.844	0.885	0.873	0.892	0.664	0.715	0.96	0.997	1.099	0.955	1.027	1.364	89.4	89.3	101.6	121.8	75.7	116.3	105.8	106.8	88.7	99.9	121.2	87.4	95.7	100.2	138.1	80.7
FALSE	High	Master Protein	Q9Y608	Leucine-rich repeat flightless-interacting protein 2 OS=Homo sapiens GN=LRRFIP2 PE=1 SV=1	0	25.0189	6.10264	4	37	4	1	721	82.121	6.95	Phospho [S320(100); S328(100)]	0.725	0.785	0.925	0.868	0.639	0.988	0.952	0.856	1.008	1.357	0.882	0.925	0.918	0.963	0.971	0.821	0.951	0.919	78.3	102.9	99.2	106.8	99.9	104.9	108	86.5	94.3	106	101.8	111	90.4	110.1	67.6	143.6
FALSE	High	Master Protein	O14639	Actin-binding LIM protein 1 OS=Homo sapiens GN=ABLIM1 PE=1 SV=3	0	24.8067	7.96915	5	34	5	1	778	87.631	8.59	Phospho [S426(98.8); S431(98.2); S452(100); S655(100)]	0.899	1.168	0.931	0.753	0.395	0.805	0.975	1.195	1.301	0.8	1.124	0.98	0.896	0.945	0.821	0.892	0.708	0.925	98.7	107	98.3	88.3	107.6	90.2	109.8	110	112.6	89	87.7	122.5	84	94.2	48.5	98.2
FALSE	High	Master Protein	Q8WWM7	Ataxin-2-like protein OS=Homo sapiens GN=ATXN2L PE=1 SV=2	0	24.4118	8.55814	5	44	5	1	1075	113.304	8.59	Phospho [S111(100); S339(99.9); S559(98.5); S594(98.6)]	1.107	0.906	1.038	1.006	1.132	1.202	0.958	1.065	1.037	1.115	0.936	0.889	1.163	1.124	1.171	0.947	0.922	0.751	103.5	89.5	108.7	112.3	83.1	109.4	93.5	89.1	104.7	110.6	102.1	102	93.1	98.4	115.5	113.8
FALSE	High	Master Protein	Q6UN15	Pre-mRNA 3'-end-processing factor FIP1 OS=Homo sapiens GN=FIP1L1 PE=1 SV=1	0	24.007	7.91246	5	24	5	1	594	66.487	5.59	Phospho [S492(100); S554(100)]	1.208	1.083	1.11	1.154	0.898	1.227	1.292	1.156	0.843	1.004	1.138	1.222	1.382	0.997	1.15	0.872	1.326	1.516	99.7	106.7	114	101.3	100.8	94.9	82.5	107.4	114.6	98.8	110.1	83.6	86.4	99.1	78.2	87.4
FALSE	High	Master Protein	Q9Y490	Talin-1 OS=Homo sapiens GN=TLN1 PE=1 SV=3	0	24.0024	3.26643	5	21	5	1	2541	269.599	6.07	Phospho [S979(98.1); S1201(100); S1225(97.4)]	1.056	0.872	0.86	0.793	0.647	0.854	1.286	1.124	0.83	1.071	0.769	1.053	0.784	1.081	0.903	1.348	0.779	0.85	106.6	129.8	79.1	86.2	106.3	91.1	100.9	85.8	110.6	106.3	84.6	81.7	132.6	98.4	76.6	126.9
FALSE	High	Master Protein	P55072	Transitional endoplasmic reticulum ATPase OS=Homo sapiens GN=VCP PE=1 SV=4	0	23.9735	9.42928	4	15	4	1	806	89.266	5.26	Phospho [S13(98.5)]	0.851	1.002	1.056	0.689	0.681	1.274	0.91	0.895	0.973	0.721	0.629	0.878	0.878	0.892	1.241	0.817	0.974	0.865	84.7	90.6	87.4	126.8	87.4	123.5	99.5	105.7	94.4	94.1	111.4	102.7	86.2	105.5	85.7	90.7
FALSE	High	Master Protein	A0A0C4DGB5	Calpastatin OS=Homo sapiens GN=CAST PE=1 SV=1	0	23.732	11.2732	6	17	6	1	754	80.95	5.1	Phospho [T16(94.9); S343(100); S410(98.7)]	1.106	1.085	0.741	0.883	0.528	1.186	1.12	1.215	1.591	1.119	1.457	1.13	1.131	0.957	1.009	0.928	0.959	0.691	100.8	102	103.1	108.1	103	91.9	91.1	101.1	113.1	89.1	69	148.2	86.4	93.1	55.7	118
FALSE	High	Master Protein	P54105	Methylosome subunit pICln OS=Homo sapiens GN=CLNS1A PE=1 SV=1	0	23.6389	24.8945	4	11	4	1	237	26.199	4.11	Phospho [S102(100)]	0.836	1.157	0.997	0.783	1.82	0.602	0.687	0.598	0.672	1.225	0.643	0.63	0.753	1.174	0.756	0.741	1.012	0.752	111.2	91.4	100.1	80	83.8	100.5	133	127.7	66	129.6	110.1	74.2	81.9	110.4	176.1	118.5
FALSE	High	Master Protein	A0A087WTP3	Far upstream element-binding protein 2 OS=Homo sapiens GN=KHSRP PE=1 SV=1	0	23.3465	8.57947	5	16	5	1	711	72.982	7.71	Phospho [S181(100); S480(100)]	0.979	1.083	0.982	1.423	0.677	1.356	0.994	0.952	1.177	0.807	1.106	1.027	1.123	0.809	1.198	0.857	1.21	1.11	89.3	90.6	102.4	123.7	93.7	109.2	91.2	110.5	97.1	82.6	100.2	120.1	87.5	102.1	64.6	77
FALSE	High	Master Protein	Q9BRD0	BUD13 homolog OS=Homo sapiens GN=BUD13 PE=1 SV=1	0	23.2296	12.7625	8	18	8	1	619	70.478	9.86	Phospho [T135(100); S139(100); T159(100); S163(100); S214(100); S248(100); S271(100); S325(100)]	0.892	1.111	0.934	1.128	0.438	1.179	1.093	1.015	0.891	0.817	0.97	1.052	1.102	0.775	1.269	0.838	1.307	1.249	82.3	100.9	101.7	108.8	97.1	117.1	92.3	118.5	108.3	82.6	99.6	95	89.3	106.6	44.4	82.8
FALSE	High	Master Protein	O95425	Supervillin OS=Homo sapiens GN=SVIL PE=1 SV=2	0	22.9357	4.29088	6	29	6	1	2214	247.593	6.98	Phospho [S221(100); S245(100); S547(100); S707(100); S968(100); S1322(100)]	0.906	1.319	1.233	0.96	0.941	0.794	0.982	0.874	0.915	0.814	0.669	0.858	0.822	1.171	0.759	1.121	0.672	0.938	103.6	112.3	94	90.8	98.1	86.8	114.4	121	80.1	107.4	113.1	83.9	102.8	91.7	109.9	95.1
FALSE	High	Master Protein	P62979	Ubiquitin-40S ribosomal protein S27a OS=Homo sapiens GN=RPS27A PE=1 SV=2	0	22.9022	43.5897	6	22	6	1	156	17.953	9.64	Phospho [S57(100)]	1.146	1.118	0.878	1.007	0.73	1.063	1.07	1.163	0.997	1.168	1.244	1.047	1.209	0.875	1.011	0.971	1.023	0.873	106.3	99.2	112.2	98.6	97.1	93.8	92.8	111.7	116.3	87.5	87.7	99.7	97.1	100	72.6	116.1
FALSE	High	Master Protein	P02765	Alpha-2-HS-glycoprotein OS=Homo sapiens GN=AHSG PE=1 SV=1	0	22.2247	7.35695	3	21	3	1	367	39.3	5.72	Phospho [S138(100)]	1.083	0.826	1.195	0.774	1.385	0.65	1.043	0.881	1.185	0.741	0.809	0.843	0.81	1.32	0.731	1.515	0.715	0.843	123.1	118.5	92	73.9	95.7	83.1	113.6	73	77.9	116.7	105.6	104.7	133.9	88.4	154.7	82.8
FALSE	High	Master Protein	P53999	Activated RNA polymerase II transcriptional coactivator p15 OS=Homo sapiens GN=SUB1 PE=1 SV=3	0	22.1246	40.1575	6	27	6	1	127	14.386	9.6	Phospho [S50(100)]	0.883	0.906	0.915	0.923	1.229	1.78	0.941	1.119	1.06	1.117	0.687	0.937	1.098	1.051	1.8	0.882	1.039	1.028	73.2	78	91.1	147.6	77.7	149.3	83	91.5	113	106.1	92.4	107	89.1	100.9	122.5	111.3
FALSE	High	Master Protein	O43719	HIV Tat-specific factor 1 OS=Homo sapiens GN=HTATSF1 PE=1 SV=1	0	22.1181	15.6291	8	16	8	1	755	85.801	4.4	Phospho [S387(99); S624(100); S642(100); S702(100)]	0.791	0.97	1.181	0.912	1.111	1.322	0.918	0.866	0.789	1.093	0.754	0.903	1.019	0.885	1.111	0.837	0.901	1.008	78.4	91	101	131	89.5	110.1	99.1	104	92.9	94.9	126.7	84.6	89.7	107.2	114.7	112.8
FALSE	High	Master Protein	A0A1B0GTW1	Tight junction protein ZO-2 OS=Homo sapiens GN=TJP2 PE=1 SV=1	0	22.0758	3.36269	5	18	5	1	1249	140.641	8.19	Phospho [S189(100); S229(100); S1045(100)]	0.918	1.091	1.024	0.933	0.696	1.029	1.136	0.878	1.023	1.069	1.048	0.932	0.89	0.695	1.07	0.735	0.891	1.082	92.1	114	89.3	103.3	93.6	107.4	100.4	118.5	95.3	75.5	111.2	111.1	79.8	108.6	72.5	111.4
FALSE	High	Master Protein	O95218	Zinc finger Ran-binding domain-containing protein 2 OS=Homo sapiens GN=ZRANB2 PE=1 SV=2	0	22.0015	18.1818	5	19	5	1	330	37.382	10.01	Phospho [S120(100); S188(100)]	1.137	0.933	0.848	1.269	1.037	1.127	0.954	0.77	0.824	1.04	0.938	0.8	1.146	0.816	1.148	0.841	1.252	1.294	108.9	91.3	109.7	107.9	76.6	109.9	95.7	108.2	89.4	94.7	98.4	95.6	97.6	116.1	92.7	93
FALSE	High	Master Protein	A0A0G2JL56	HLA class I histocompatibility antigen, A-3 alpha chain OS=Homo sapiens GN=HLA-A PE=1 SV=1	0	21.9832	20.0508	5	18	3	1	394	44.229	6.25	Phospho [S359(98.2)]	1.234	1.254	1.009	0.606	0.643	1.025	0.838	0.776	0.626	1.445	0.604	0.729	1.035	1.054	1.29	0.996	1.752	0.438	120.8	82	101.3	100.3	71.4	126.2	97.9	130.8	80.9	109.9	105.2	65.3	103.8	104.2	69.4	155.9
FALSE	High	Master Protein	Q9UBS3	DnaJ homolog subfamily B member 9 OS=Homo sapiens GN=DNAJB9 PE=1 SV=1	0	21.9767	23.3184	3	38	3	1	223	25.502	8.27	Phospho [S106(99.1)]	0.664	0.035	0.039	0.381	0.456	0.609	0.573	0.035	0.073	1.858	4.712	8.232	0.609	0.048	0.528	0.053	0.134	0.172	38	32.9	34.9	34.9	471.7	30.3	57.3	19	19.2	26	21.4	40.1	29.1	545.2	36.6	149.3
FALSE	High	Master Protein	Q6WCQ1	Myosin phosphatase Rho-interacting protein OS=Homo sapiens GN=MPRIP PE=1 SV=3	0	21.946	11.0244	7	15	4	1	1025	116.461	6.21	Phospho [S362(97.6); S619(100); S891(100); S1016(98.7)]	1.119	0.752	0.952	0.862	1.028	0.891	1.095	0.927	0.86	1.039	0.869	0.97	0.875	1.14	0.728	0.99	0.805	0.783	117.3	114.8	91.7	93.4	101.7	76.3	104.8	79.5	98	120.6	100.7	90.9	104.6	105.7	112.7	113.9
FALSE	High	Master Protein	Q9H7N4	Splicing factor, arginine/serine-rich 19 OS=Homo sapiens GN=SCAF1 PE=1 SV=3	0	21.872	4.49695	6	18	6	1	1312	139.186	9.25	Phospho [S498(100); S719(100); S724(98.4); S734(100); S965(97.6)]	0.948	1.176	1.069	0.882	0.725	1.035	1.138	0.931	0.907	0.836	0.961	1.019	1.032	0.883	1.058	0.875	1.074	1.003	91.8	110.1	99.9	100.2	98.7	102.5	96.8	120.3	95.3	90.4	109.3	92.8	89.5	102.3	78.3	90.3
FALSE	High	Master Protein	Q14157	Ubiquitin-associated protein 2-like OS=Homo sapiens GN=UBAP2L PE=1 SV=2	0	21.7566	6.71573	5	36	5	1	1087	114.465	7.11	Phospho [S467(100)]	1.053	1.187	0.981	1.24	0.603	1.515	0.873	0.963	1.031	0.758	0.835	0.873	1.127	0.891	1.313	0.944	1.229	0.885	95	78.8	101.8	136.8	78.8	118.5	90.3	118.8	96.3	89.1	98.2	103.1	94.4	100	64.4	81
FALSE	High	Master Protein	P00558	Phosphoglycerate kinase 1 OS=Homo sapiens GN=PGK1 PE=1 SV=3	0	21.7308	24.2206	9	16	9	1	417	44.586	8.1	Phospho [S203(100)]	1.311	1.036	0.885	1.708	0.47	1.023	1.022	1.387	1.153	0.765	1.545	1.106	0.915	0.9	1.005	1.017	1.285	0.979	124.3	96.9	86.7	97	104.8	95.3	94.8	98.3	131.6	85.4	84	109.4	96.5	94.9	42.4	69.1
FALSE	High	Master Protein	P52758	2-iminobutanoate/2-iminopropanoate deaminase OS=Homo sapiens GN=RIDA PE=1 SV=1	0	21.4462	44.5255	5	10	5	1	137	14.485	8.68	Phospho [S136(100)]	0.841	0.789	0.663	0.923	1.456	0.719	0.894	1.235	1.777	1.929	2.124	0.936	0.946	1.034	0.711	0.805	0.6	0.529	97.3	103.5	109.5	83.3	108.3	82.3	115.8	75.6	118.4	99.1	63.6	170.3	77.1	95.9	119.1	157.8
FALSE	High	Master Protein	Q92609	TBC1 domain family member 5 OS=Homo sapiens GN=TBC1D5 PE=1 SV=1	0	21.3022	4.65409	3	30	3	1	795	88.949	6.54	Phospho [S522(100); S541(97.6); T560(96.5)]	1.188	1.45	0.834	0.704	0.526	1.123	0.935	1.04	1.195	0.821	1.155	0.923	1.074	0.848	0.923	0.762	0.73	0.595	116.1	91.4	104.9	109.7	90.2	90.1	97.7	142.4	102.1	83.2	81.8	117.4	74.8	98.2	66.5	103.9
FALSE	High	Master Protein	A0A096LPC5	WASH complex subunit 2C OS=Homo sapiens GN=WASHC2C PE=1 SV=1	0	21.2573	8.2774	6	21	6	1	1341	147.065	4.81	Phospho [S213(99.9); S333(99); S356(98.6)]	0.88	1.292	0.704	0.83	0.999	0.82	0.897	1.022	1.108	1.087	1.004	0.82	0.969	0.911	0.934	0.858	1.115	0.886	97.5	99.3	107.3	90.8	90.8	103.4	110.8	131.2	103.8	92.5	71.5	112.5	87.1	101.6	101.1	109.9
FALSE	High	Master Protein	P18206	Vinculin OS=Homo sapiens GN=VCL PE=1 SV=4	0	20.9215	5.02646	5	33	5	1	1134	123.722	5.66	Phospho [S290(100); S345(98.9); S579(100); S721(100)]	1.298	0.854	0.907	0.481	0.959	0.68	1.274	1.153	0.828	1.274	0.649	0.843	0.816	1.259	0.8	1.321	0.591	0.603	135.4	132.9	85.1	70.9	87.9	83.5	104.3	81.6	110.2	120.4	86.8	79.1	126.3	95.6	120.8	160.5
FALSE	High	Master Protein	A0A087WUT6	Eukaryotic translation initiation factor 5B OS=Homo sapiens GN=EIF5B PE=1 SV=1	0	20.827	6.96721	5	16	5	1	1220	138.597	5.58	Phospho [S113(100); S137(97.6); S164(100); S190(100); S214(100)]	1.122	1.072	1.155	0.801	1.144	0.896	0.86	0.885	1.039	0.905	0.808	0.873	1.253	0.944	1.008	0.931	0.823	0.808	112	85.8	125.1	89.5	87.1	100.6	99.8	106.8	88.2	94	115	103.5	92.8	99.6	127.3	100.7
FALSE	High	Master Protein	Q13242	Serine/arginine-rich splicing factor 9 OS=Homo sapiens GN=SRSF9 PE=1 SV=1	0	20.8115	14.9321	3	31	3	1	221	25.526	8.65	Phospho [S204(100); S211(100)]	0.841	1.995	1.337	1.064	0.389	1.472	0.961	0.956	1.161	0.663	1.172	0.87	1.414	0.657	1.23	0.696	1.438	1.174	75.6	86.4	127.1	132.3	78.2	110.5	89.9	179	85.8	58.9	120	104.2	62.4	89.7	39.4	67.2
FALSE	High	Master Protein	Q8NC51	Plasminogen activator inhibitor 1 RNA-binding protein OS=Homo sapiens GN=SERBP1 PE=1 SV=2	0	20.8035	19.3627	5	13	5	1	408	44.938	8.65	Phospho [S25(100); S328(99.2)]	0.881	1.125	1.02	1.421	0.333	1.086	1.012	1.048	0.942	0.704	1.151	0.97	1.099	0.987	1.195	0.924	1.376	1.208	85.2	97.7	106.2	105	93.8	115.5	96.6	111.7	104.2	98	101.3	93.6	91.8	99.4	32.4	68.5
FALSE	High	Master Protein	Q14676	Mediator of DNA damage checkpoint protein 1 OS=Homo sapiens GN=MDC1 PE=1 SV=3	0	20.7216	9.23887	8	19	8	1	2089	226.529	5.47	Phospho [S168(100); S329(100); T659(98.1); S780(100); S793(100); T1425(99.7)]	0.788	0.89	1.409	0.835	1.983	0.559	0.693	0.597	0.748	1.306	0.571	0.697	0.678	0.983	0.928	0.708	0.956	0.785	103.2	90.7	88.8	73.3	91.4	121.6	131	98.4	66	108.6	155.7	82.6	78.2	110.5	186.7	122.9
FALSE	High	Master Protein	A0A1W2PPS1	Heterogeneous nuclear ribonucleoprotein U OS=Homo sapiens GN=HNRNPU PE=4 SV=1	0	20.707	12.6866	5	10	5	1	804	88.263	5.78	Phospho [S59(100); S252(100)]	0.934	1.005	1.582	1.26	0.443	0.865	0.788	1.246	0.807	0.957	1.013	0.738	0.754	1.174	0.882	1.17	1.391	1.65	109.7	92.5	88.5	101.6	86.6	103.6	117.4	88.1	109.2	102.9	138.7	70.7	102.6	87.7	40.2	86.8
FALSE	High	Master Protein	Q7Z5L9	Interferon regulatory factor 2-binding protein 2 OS=Homo sapiens GN=IRF2BP2 PE=1 SV=2	0	20.599	13.2879	6	10	6	1	587	60.987	8.69	Phospho [S175(100); S240(100); S323(97.6); S360(100); S457(97.8)]	1.003	0.991	1.213	1.05	0.542	1.102	0.901	1.151	0.971	0.723	0.68	0.824	1.024	0.984	1.025	1.007	0.829	0.515	102	91.7	104.2	112.1	83.9	104.3	101.8	94.8	110.1	94.1	116	92.9	96.4	95.7	71.1	94.8
FALSE	High	Master Protein	P05114	Non-histone chromosomal protein HMG-14 OS=Homo sapiens GN=HMGN1 PE=1 SV=3	0	20.448	49	4	10	4	1	100	10.653	9.6	Phospho [S7(99); S86(100); S99(100)]	0.835	1.246	0.953	0.767	0.578	1.029	1.043	0.963	0.902	1.132	1.086	0.986	1.046	0.861	1.225	1.006	1.014	1.169	81.6	101.9	102.2	100.6	96.3	119.7	97.7	125.9	97.3	86.9	96.2	91.1	101.6	101	60	117.4
FALSE	High	Master Protein	B1AHL2	Fibulin-1 OS=Homo sapiens GN=FBLN1 PE=1 SV=1	0	20.3433	6.93481	3	17	3	1	721	78.277	5.39	Phospho [S185(100)]	0.934	0.614	1.418	0.562	2.266	0.554	0.776	0.798	0.869	1.041	0.718	0.939	0.637	1.808	0.63	1.399	0.759	0.676	119.5	99.3	81.6	70.9	120.2	80.6	128	54.3	70.7	160	125.6	77	123.9	88.5	225.9	103.8
FALSE	High	Master Protein	Q02818	Nucleobindin-1 OS=Homo sapiens GN=NUCB1 PE=1 SV=4	0	20.2798	11.7137	5	15	5	1	461	53.846	5.25	Phospho [S369(100)]	0.766	1.11	0.904	1.335	0.454	0.548	1.359	1.163	2.22	1.051	2.142	2.386	0.698	0.599	0.54	0.658	0.845	0.997	73.5	130.3	67	52.6	228.9	51.8	95.9	101.5	106.4	54.8	82.6	203	60.2	91.5	40.6	94
FALSE	High	Master Protein	P08559	Pyruvate dehydrogenase E1 component subunit alpha, somatic form, mitochondrial OS=Homo sapiens GN=PDHA1 PE=1 SV=3	0	20.1891	5.89744	2	27	2	1	390	43.268	8.06	Phospho [S232(99.2); S293(100)]	1.299	0.514	0.861	0.482	0.525	1.107	0.986	1.002	0.636	0.996	1.118	1.108	1.697	0.559	1.392	0.52	1.361	0.676	105.8	80.4	138.3	90.2	90.3	113.5	81.5	70.7	137.7	76.8	118.4	87.4	71.5	137.5	59.6	113.2
FALSE	High	Master Protein	C9J6P4	Zinc finger CCCH-type antiviral protein 1 OS=Homo sapiens GN=ZC3HAV1 PE=1 SV=1	0	20.0891	7.51953	5	24	5	1	1024	114.013	8.56	Phospho [S257(100); S275(100); S284(100)]	1.092	0.937	1.037	0.699	1.125	1.356	0.925	0.868	0.944	1.235	0.704	0.985	1.237	0.829	1.141	0.839	1.051	0.818	98.8	83.7	111.9	122.7	89.1	103.2	90.5	101.6	94.2	89.9	112.5	102.3	91	108.5	118.7	130.4
FALSE	High	Master Protein	Q14847	LIM and SH3 domain protein 1 OS=Homo sapiens GN=LASP1 PE=1 SV=2	0	20.0181	18.0077	5	25	5	1	261	29.698	7.05	Phospho [S61(100); S146(100)]	1.071	1.266	0.82	0.952	0.53	0.889	1.42	1.293	1.494	0.913	1.4	1.147	1.063	0.909	0.887	0.981	0.863	0.983	100.3	133	99.5	83.2	107.4	83	93.6	114.1	116.6	82	73.9	134.7	88.5	90.2	55.8	96.3
FALSE	High	Master Protein	O43741	5'-AMP-activated protein kinase subunit beta-2 OS=Homo sapiens GN=PRKAB2 PE=1 SV=1	0	19.9063	25.3676	4	44	4	1	272	30.283	6.46	Phospho [S95(98.3); S108(100)]	1.152	1.023	1.034	0.677	1.262	0.8	1.066	0.869	1.153	1.502	1.137	1.111	1.075	0.868	0.863	0.7	0.93	0.758	114.1	105.6	106.5	79.2	110.1	85.5	99.1	107.8	91.5	91.4	108.9	121.4	73.7	105.3	121.5	144.7
FALSE	High	Master Protein	P49736	DNA replication licensing factor MCM2 OS=Homo sapiens GN=MCM2 PE=1 SV=4	0	19.5508	4.31416	5	37	5	1	904	101.832	5.52	Phospho [S139(100)]	1.162	0.736	1.391	0.855	0.558	1.088	0.868	0.815	0.687	0.65	0.581	0.755	1.188	0.709	1.081	0.794	0.962	1.05	113.9	85.1	116.5	106.7	74	105.9	98	84	93	81	158.8	78.4	90.6	114.2	69.1	80.5
FALSE	High	Master Protein	Q96CX2	BTB/POZ domain-containing protein KCTD12 OS=Homo sapiens GN=KCTD12 PE=1 SV=1	0	19.5182	17.5385	2	38	2	1	325	35.679	5.64	Phospho [S151(92.6)]	0.987	0.729	1.046	0.709	1.318	0.776	0.809	0.86	0.739	1.382	0.909	0.763	0.74	1.021	0.881	0.921	0.999	0.856	116	95.1	86.9	91.2	89.7	103.6	117.5	80.8	95.3	113.2	115.9	81.9	102.1	110.8	128.6	134.9
FALSE	High	Master Protein	Q13523	Serine/threonine-protein kinase PRP4 homolog OS=Homo sapiens GN=PRPF4B PE=1 SV=3	0	19.2165	8.143	6	26	6	1	1007	116.916	10.26	Phospho [S142(100); S144(100); S257(100); S277(100); S294(100); S366(100); S368(100); S852(96.9)]	1.076	1.095	1.307	1.407	0.433	1.3	0.984	1.037	0.883	0.852	0.82	0.978	1.15	0.806	1.32	1.052	1.209	1.605	96.5	88.2	103.1	116.6	87.7	118.3	89.7	106.7	101.1	78.6	127.4	86.1	102.5	97.5	41.4	81.4
FALSE	High	Master Protein	Q9NTI5	Sister chromatid cohesion protein PDS5 homolog B OS=Homo sapiens GN=PDS5B PE=1 SV=1	0	19.2004	3.59364	3	24	3	1	1447	164.563	8.47	Phospho [S1358(100)]	0.84	0.806	1.056	0.885	0.898	0.675	0.866	0.862	0.755	1.04	0.872	0.75	0.742	0.807	0.716	1.009	0.823	0.883	105.2	108.5	92.9	84.5	94	89.7	125.3	89.6	95.9	89.7	117.5	83.9	112.2	111.2	98.2	113.7
FALSE	High	Master Protein	P30492	HLA class I histocompatibility antigen, B-54 alpha chain OS=Homo sapiens GN=HLA-B PE=1 SV=1	0	19.1989	24.5856	4	44	2	1	362	40.355	6.3	Phospho [S359(95.1)]	1.204	0.893	1.057	0.604	1.087	0.905	1.041	0.859	0.886	1.022	0.741	0.937	0.984	1.082	1.018	1.125	0.915	0.705	118.9	102.8	97.1	89.4	92.5	100.6	98.8	90.5	87.1	109.8	107.2	89.9	114.1	101.4	125.3	117.8
FALSE	High	Master Protein	E9PRY8	Elongation factor 1-delta OS=Homo sapiens GN=EEF1D PE=1 SV=1	0	19.1114	8.17791	3	18	3	1	697	76.523	7.05	Phospho [S549(100); S578(100)]	0.888	1.458	0.968	1.366	0.553	1.956	0.798	1.002	0.936	0.811	0.94	0.854	1.167	0.719	1.497	0.794	1.212	0.948	76.2	68.4	100.1	167.8	73.3	128.4	85.8	148.4	102	73.2	98.6	95.3	80.8	101.8	56.6	83.1
FALSE	High	Master Protein	P17096	High mobility group protein HMG-I/HMG-Y OS=Homo sapiens GN=HMGA1 PE=1 SV=3	0	19.0404	48.5981	5	18	5	1	107	11.669	10.32	Phospho [S9(99.2); S36(100); T53(100)]	1.07	1.162	1.577	1.042	0.991	1.301	0.973	0.992	1.013	0.911	0.892	0.95	1.462	0.764	1.266	0.857	1.148	1.14	93.3	84.9	127.6	113.5	82.9	110.5	87.3	110.4	94.3	72.6	149.9	96.2	81.5	95	97.4	89.5
FALSE	High	Master Protein	O43491	Band 4.1-like protein 2 OS=Homo sapiens GN=EPB41L2 PE=1 SV=1	0	19.0348	4.0796	4	20	4	1	1005	112.519	5.44	Phospho [S39(100); S87(100)]	0.955	1.064	1.183	1.208	0.967	1.4	1.11	1.082	0.98	1.289	0.852	1.086	1.002	0.877	1.066	0.972	1.163	0.999	87.7	102	92.1	128.6	99.7	98	91.9	104	105.8	85.8	115.6	95.9	95.1	97.8	90.5	120.7
FALSE	High	Master Protein	Q02880	DNA topoisomerase 2-beta OS=Homo sapiens GN=TOP2B PE=1 SV=3	0	18.9241	4.48954	4	14	4	1	1626	183.152	8	Phospho [S1454(98.6); S1550(100); S1581(98.3)]	0.874	1.238	1.653	0.704	1.131	0.603	0.92	1.013	1.038	0.884	0.692	0.757	0.988	1.109	0.85	0.891	0.65	1.179	102.1	107.5	115.4	70.4	88.4	99.4	116.8	109.1	89.3	97.8	145.7	91.5	78.5	88.1	126.8	99.2
FALSE	High	Master Protein	A0A0D9SG04	Cordon-bleu protein-like 1 OS=Homo sapiens GN=COBLL1 PE=1 SV=2	0	18.9153	4.94728	4	30	4	1	1233	134.835	6.71	Phospho [S717(100); S1175(96.5)]	0.849	0.831	0.749	0.606	1.355	0.924	0.881	0.958	1.849	0.935	1.43	0.904	0.815	0.728	0.908	0.74	0.779	0.62	94.7	98.2	90.8	103	100.8	101.1	111.4	84.8	97.8	74.4	76.5	188.8	75.5	102.1	141	97.3
FALSE	High	Master Protein	Q9Y2D5	A-kinase anchor protein 2 OS=Homo sapiens GN=AKAP2 PE=1 SV=3	0	18.7948	7.21769	4	24	4	1	859	94.603	5.11	Phospho [S152(100); S393(100); S720(100); S748(100)]	0.869	1.172	0.783	0.752	1.388	0.749	1.279	1.166	1.606	1.28	1.173	1.09	0.689	1.066	0.976	1.01	1.083	0.879	91.4	134.6	72.4	78.8	114.7	102.7	105.2	105.2	104.6	95.6	70.2	144.1	90.6	89.7	128.6	118.6
FALSE	High	Master Protein	P05388	60S acidic ribosomal protein P0 OS=Homo sapiens GN=RPLP0 PE=1 SV=1	0	18.5091	6.30915	2	24	2	1	317	34.252	5.97	Phospho [S307(100)]	1.112	0.698	0.826	0.547	2.257	0.768	0.908	0.591	0.46	1.984	0.656	0.856	1.111	0.9	1.148	1.024	1.094	0.994	112.7	92.1	112.7	77.9	86.8	116.4	101.4	88.9	75.2	114.6	105.1	58.5	130.3	127.3	185.2	162.8
FALSE	High	Master Protein	A0A1B0GTU4	Paxillin OS=Homo sapiens GN=PXN PE=1 SV=1	0	18.4645	7.9556	4	26	4	1	1081	115.832	5.64	Phospho [S83(100); S143(100); S793(98.5)]	1.135	0.883	0.944	0.601	1.369	0.87	1.018	0.856	0.855	1.014	0.895	0.88	0.938	1.062	0.851	0.843	0.893	0.523	118.7	106.5	98.2	91	92	89	104.6	96	93	115.3	102.6	92.9	91.6	108.6	152.3	112.8
FALSE	High	Master Protein	P22059	Oxysterol-binding protein 1 OS=Homo sapiens GN=OSBP PE=1 SV=1	0	18.4525	8.17844	3	20	3	1	807	89.365	7.3	Phospho [S190(100); S193(100); S351(100); S386(99.9)]	1.093	0.627	0.89	0.807	2.047	0.776	0.746	0.749	0.48	1.685	0.642	0.72	0.966	1.075	0.98	0.869	1.05	0.864	121.8	83.2	107.7	86.5	80.2	109.2	111.5	77.1	92.1	132.2	109.5	59.1	107	123	177.1	145.7
FALSE	High	Master Protein	P55795	Heterogeneous nuclear ribonucleoprotein H2 OS=Homo sapiens GN=HNRNPH2 PE=1 SV=1	0	18.2856	15.3675	4	16	1	1	449	49.232	6.3	Phospho [S104(100)]	1.184	2.351	0.668	1.027	1.507	0.872	0.737	0.852	0.755	1.545	0.758	0.796	1.156	0.561	1.137	0.663	1.136	0.914	120.5	74.9	117.6	88.7	81	115.6	101.7	240.3	87	57.3	68.3	77.2	67.7	102.2	133.7	137.1
FALSE	High	Master Protein	O43294	Transforming growth factor beta-1-induced transcript 1 protein OS=Homo sapiens GN=TGFB1I1 PE=1 SV=2	0	18.2715	15.6182	5	13	5	1	461	49.782	7.03	Phospho [S68(100); S137(100); S403(100)]	1.096	1	0.825	0.66	0.986	0.752	1.421	0.906	1.021	1.25	0.77	1.094	0.745	0.931	0.762	0.887	0.653	0.657	111.7	144.8	75.9	76.6	111.5	77.6	101.9	106.5	96.6	99.2	87.9	108.8	94.5	106.5	115.5	146.4
FALSE	High	Master Protein	Q13442	28 kDa heat- and acid-stable phosphoprotein OS=Homo sapiens GN=PDAP1 PE=1 SV=1	0	18.2464	19.8895	3	20	3	1	181	20.618	8.87	Phospho [S63(100)]	0.859	1.348	1.059	1.414	1.474	0.9	0.824	0.871	0.796	0.988	0.969	0.879	0.985	0.897	0.959	0.704	0.797	1.007	93.9	90.1	107.6	98.4	96	104.7	109.3	141.4	91.3	94.1	111.1	83.4	73.8	104.9	134.8	90.5
FALSE	High	Master Protein	Q15746	Myosin light chain kinase, smooth muscle OS=Homo sapiens GN=MYLK PE=1 SV=4	0	18.1527	4.12748	5	17	5	1	1914	210.583	6.15	Phospho [S305(100); S1779(96.4)]	0.935	0.752	0.874	0.586	1.635	0.825	0.961	0.904	0.706	1.528	0.756	0.83	0.775	1.198	0.836	1.217	0.844	0.844	106.2	109.2	88	93.7	94.3	95	113.6	79.1	95.1	126.1	92	74.3	128.1	105.3	159.2	148.7
FALSE	High	Master Protein	Q13586	Stromal interaction molecule 1 OS=Homo sapiens GN=STIM1 PE=1 SV=3	0	18.0408	9.63504	4	27	4	1	685	77.375	6.67	Phospho [S257(100); T665(94.6)]	1.218	0.928	0.917	0.701	0.569	1.057	1.362	1.037	0.752	0.965	0.761	0.984	1.155	0.893	1.328	0.939	0.908	0.949	105.2	117.7	99.8	91.3	85	114.7	86.4	100.5	112.2	96.7	99.3	81.4	101.6	108.3	68	115.4
FALSE	High	Master Protein	Q92786	Prospero homeobox protein 1 OS=Homo sapiens GN=PROX1 PE=1 SV=2	0	18.011	7.59837	4	18	4	1	737	83.151	7.18	Phospho [S179(98); S199(100); S295(100); S511(100)]	0.852	1.659	0.769	0.974	0.461	0.938	1.017	1.038	1.299	0.757	1.036	0.909	0.846	0.803	0.893	1.049	0.725	1.158	92.4	110.3	91.8	101.7	98.6	96.8	108.5	152.5	95.4	73.8	70.7	119.4	96.4	91.9	52.9	86.7
FALSE	High	Master Protein	Q13884	Beta-1-syntrophin OS=Homo sapiens GN=SNTB1 PE=1 SV=3	0	17.9282	10.223	4	16	4	1	538	58.025	8.63	Phospho [S87(100); S219(100); S389(100)]	0.995	0.716	0.659	0.67	1.451	0.807	0.85	0.67	0.595	1.267	0.776	0.822	1.006	0.91	0.87	0.947	1.03	0.803	109.7	93.7	110.9	88.9	90.6	95.9	110.3	91.2	85.4	115.9	83.9	75.8	120.6	127.3	145.2	126.8
FALSE	High	Master Protein	Q92614	Unconventional myosin-XVIIIa OS=Homo sapiens GN=MYO18A PE=1 SV=3	0	17.8536	3.45667	5	18	5	1	2054	232.971	6.3	Phospho [S72(97.9); S1998(100); S2014(96.7)]	1.053	0.869	0.844	1.081	0.959	0.891	1.023	1.074	0.874	1.342	1.25	1.041	0.929	0.991	0.993	1.154	0.845	0.906	106.4	103.3	93.8	90	105.2	100.3	101	89.4	110.5	101.9	86.8	89.9	118.7	102.8	90.9	127.2
FALSE	High	Master Protein	F5H5P2	Uncharacterized protein OS=Homo sapiens PE=4 SV=1	0	17.8253	5.01044	3	34	3	1	479	54.169	6.43	Phospho [S371(100)]	0.722	0.758	0.663	0.558	0.681	1.19	1.12	1.307	1.59	2.344	2.556	2.353	0.84	0.618	1.11	0.76	0.672	0.611	60.6	94.1	70.5	100	197.6	93.3	84	79.2	136.7	64.6	69.3	166.2	79.5	104.6	56.6	194.8
FALSE	High	Master Protein	J3KN01	Afadin OS=Homo sapiens GN=AFDN PE=1 SV=1	0	17.8229	3.16767	4	24	4	1	1831	207.489	6.37	Phospho [S1189(100); S1786(100); S1806(100)]	0.946	1.071	0.856	0.75	1.2	0.966	1.168	1.001	1.132	0.993	0.979	1.087	1.009	0.868	0.941	0.88	0.764	0.78	93	114.9	99.3	95.1	106.9	92.5	98.4	110.2	102.9	89.2	88.1	116.3	90.5	102.8	129.9	107.5
FALSE	High	Master Protein	P55884	Eukaryotic translation initiation factor 3 subunit B OS=Homo sapiens GN=EIF3B PE=1 SV=3	0	17.6202	14.9877	5	17	5	1	814	92.424	5	Phospho [S81(90.1); S119(96.1); S152(97.3)]	0.801	0.829	1.108	0.501	5.402	0.723	0.828	0.885	0.693	1.634	0.44	0.695	0.673	1.143	0.884	1.091	0.791	0.506	100.1	103.5	84	90.4	86.8	110.4	124.9	86	91.8	118.6	114.9	71.9	113.2	103.7	368.1	111.3
FALSE	High	Master Protein	Q8N1G4	Leucine-rich repeat-containing protein 47 OS=Homo sapiens GN=LRRC47 PE=1 SV=1	0	17.5501	8.4048	3	16	3	1	583	63.434	8.28	Phospho [S520(96.4)]	1.089	0.959	1.063	0.822	0.581	1.182	1.33	1.08	1.099	0.963	0.923	1.055	1.282	0.989	1.081	0.906	1.296	0.901	95	116.1	111.9	103.2	92.1	94.4	87.3	94.6	106.6	97.5	104.9	108.4	89.4	98.7	62.7	103.9
FALSE	High	Master Protein	P18583	Protein SON OS=Homo sapiens GN=SON PE=1 SV=4	0	17.5335	2.30833	4	20	4	1	2426	263.664	5.64	Phospho [T282(97.5); S1697(100); S2009(100); S2011(100); S2013(100)]	1.003	1.306	1.502	0.848	0.591	1.274	0.973	1.002	1.159	0.675	0.671	0.958	1.087	0.854	1.096	0.908	1.349	1.049	95	92.2	102.9	120.7	90.7	103.8	94.7	118.3	90.7	77.3	136	105	82.2	90.5	66.9	76.4
FALSE	High	Master Protein	J3QR44	Cyclin-dependent kinase 11B OS=Homo sapiens GN=CDK11B PE=1 SV=2	0	17.5269	6.41509	5	16	5	1	795	92.563	5.54	Phospho [S47(100); S115(100); S283(99); S589(100); T595(97.2)]	1.102	1.013	1.395	0.972	0.579	1.224	1.053	1.084	0.953	0.887	0.972	1.095	1.018	0.804	1.391	0.966	1.071	1.214	97.9	93.5	90.4	108.7	97.3	123.5	88.8	98.2	105.2	78	135.4	92.4	93.7	97	60.5	92.8
FALSE	High	Master Protein	Q8IZP0	Abl interactor 1 OS=Homo sapiens GN=ABI1 PE=1 SV=4	0	17.5207	7.28346	3	18	3	1	508	55.047	7.06	Phospho [S183(97.8); S225(100); S242(98.7)]	0.843	1.031	0.911	1.528	0.475	1.214	0.909	1.109	1.043	0.808	1.115	0.957	0.923	0.914	1.18	1.019	1.211	1.081	84	90.6	92	120.9	95.3	117.6	99.6	102.7	110.4	91	90.8	103.9	101.5	99.6	46.1	78.4
FALSE	High	Master Protein	Q9NWH9	SAFB-like transcription modulator OS=Homo sapiens GN=SLTM PE=1 SV=2	0	17.4458	2.99807	4	17	4	1	1034	117.079	7.87	Phospho [S289(100); S553(100)]	0.937	0.923	1.48	1.091	0.648	1.051	0.899	0.907	0.922	0.79	0.778	0.859	0.952	0.828	0.955	0.862	0.753	0.992	98.6	94.6	100.1	110.6	90.4	100.5	105.2	93.3	91.8	83.7	149.7	93.2	87.2	101.1	74.9	91.4
FALSE	High	Master Protein	Q92597	Protein NDRG1 OS=Homo sapiens GN=NDRG1 PE=1 SV=1	0	17.3632	8.12183	3	44	3	1	394	42.808	5.82	Phospho [S326(98.4); T699(99); T699(100); T699(95.2); T699(99); S700(95.5); S700(96.8)]	1.402	1.474	0.78	1.216	0.672	0.887	1.038	0.926	0.847	0.842	1.106	1.013	1.069	0.77	1.011	0.8	1.741	1.053	132.3	97.9	100.9	83.7	95.5	95.3	94.4	156.4	98.2	81.7	82.7	89.9	84.9	106.1	61.7	77.2
FALSE	High	Master Protein	Q66K74	Microtubule-associated protein 1S OS=Homo sapiens GN=MAP1S PE=1 SV=2	0	17.3032	8.78187	4	18	4	1	1059	112.142	7.3	Phospho [S582(100); S759(100); S809(98.8)]	1.052	0.851	0.855	0.978	0.649	0.779	0.84	1.074	0.903	0.932	0.815	0.742	0.822	0.983	0.902	0.978	0.872	0.915	120	95.8	93.7	88.9	84.6	102.9	114.1	89.6	113.2	103.6	90.1	95.2	103	105.4	73.7	105.9
FALSE	High	Master Protein	Q15811	Intersectin-1 OS=Homo sapiens GN=ITSN1 PE=1 SV=3	0	17.1717	3.48635	3	22	3	1	1721	195.3	7.77	Phospho [S203(100); S315(100); S904(100)]	0.908	1.162	0.736	0.569	1.042	1.103	1.317	1.055	1.018	1.195	1.075	1.622	0.971	0.755	1.004	0.832	0.676	0.597	80.2	116.3	85.8	97.4	143.2	88.7	88.3	124.1	112.6	80.6	78.6	108.6	88.8	106.8	118.5	136
FALSE	High	Master Protein	P35221	Catenin alpha-1 OS=Homo sapiens GN=CTNNA1 PE=1 SV=1	0	17.1231	4.08389	2	24	2	1	906	100.009	6.29	Phospho [S641(100); S655(98.6)]	1.046	0.473	0.713	0.697	1.266	0.809	1.108	0.763	0.434	2.728	0.586	0.898	1.106	0.848	1.137	0.959	0.905	1.589	103.1	109.2	109	79.7	88.5	112	98.6	63.8	103	114.4	96.2	58.5	129.3	134.9	101	217.7
FALSE	High	Master Protein	Q16666	Gamma-interferon-inducible protein 16 OS=Homo sapiens GN=IFI16 PE=1 SV=3	0	16.9421	4.84076	2	17	2	1	785	88.199	9.28	Phospho [S153(100)]	0.697	0.978	1.021	0.795	1.453	0.346	1.011	0.863	0.918	1.423	1.115	0.581	0.332	1.067	0.375	0.959	1.149	0.793	112.4	163	53.6	55.7	93.7	60.5	161.2	100.5	88.8	109.7	105	94.4	98.6	102.8	131.6	128.9
FALSE	High	Master Protein	Q15084	Protein disulfide-isomerase A6 OS=Homo sapiens GN=PDIA6 PE=1 SV=1	0	16.9286	10.9091	3	11	3	1	440	48.091	5.08	Phospho [S428(100)]	1.188	0.823	0.786	0.686	1.511	0.788	0.928	0.707	0.623	2.078	0.889	1.104	1.109	0.88	0.957	0.791	1.517	1.062	117.6	91.8	109.7	78	109.2	94.7	99	102.7	88.2	109.8	98.1	77.7	98.7	124.8	121	166.4
FALSE	High	Master Protein	Q8N6T3	ADP-ribosylation factor GTPase-activating protein 1 OS=Homo sapiens GN=ARFGAP1 PE=1 SV=2	0	16.7951	16.5025	5	31	5	1	406	44.64	5.66	Phospho [S348(99.8); S361(99)]	0.991	0.895	1.002	0.794	0.328	0.824	0.884	0.939	0.891	0.625	0.825	0.827	0.957	0.974	0.91	0.898	0.792	1.105	108.5	96.8	104.8	90.2	90.5	99.6	109.5	94.9	99.6	103.3	106.3	94.5	95.3	106.1	42	80
FALSE	High	Master Protein	Q92934	Bcl2-associated agonist of cell death OS=Homo sapiens GN=BAD PE=1 SV=3	0	16.5092	31.5476	5	19	5	1	168	18.381	7.15	Phospho [S99(100); S118(100); S134(100); T137(94.1)]	0.876	1.152	0.657	1.438	0.66	1.082	0.944	1.221	1.718	0.771	1.612	1.255	0.876	0.765	0.954	0.821	0.996	0.877	87.7	94.6	87.8	108.4	125.8	95.5	100.2	109.9	116.6	73	62.7	164	78.4	95.4	62.9	73.4
FALSE	High	Master Protein	Q15019	Septin-2 OS=Homo sapiens GN=SEPT2 PE=1 SV=1	0	16.507	5.54017	2	15	2	1	361	41.461	6.6	Phospho [S218(100)]	1.15	0.477	1.14	0.589	1.778	0.618	0.763	0.726	0.474	1.873	0.557	0.83	0.801	1.683	1.015	1.542	0.861	0.797	130.3	86.5	90.7	70.1	94.1	115.1	113.3	47.4	72.2	167.3	113.3	47.1	153.3	99.4	167	175.9
FALSE	High	Master Protein	O75494	Serine/arginine-rich splicing factor 10 OS=Homo sapiens GN=SRSF10 PE=1 SV=1	0	16.4798	11.0687	4	25	4	1	262	31.282	11.27	Phospho [S131(100); S133(100); S158(100)]	0.797	1.266	1.027	1.296	0.806	1.097	1.072	1.196	0.964	0.882	1.055	1.016	0.85	0.771	1.137	0.934	0.954	1.524	80.1	107.7	85.4	110.2	102	114.2	100.4	123.8	117	75.4	100.5	94.3	91.3	97.8	75	82.1
FALSE	High	Master Protein	P52948	Nuclear pore complex protein Nup98-Nup96 OS=Homo sapiens GN=NUP98 PE=1 SV=4	0	16.4034	2.53165	3	14	3	1	1817	197.457	6.4	Phospho [S612(100); S623(100); S888(100)]	0.867	0.902	0.944	0.782	1.278	0.861	0.881	0.853	0.775	1.006	0.952	0.99	0.829	0.921	0.84	0.886	1.02	0.934	96.8	98.4	92.6	96.1	110.6	93.8	111.7	100.5	95.1	102.6	105.2	86.4	98.7	111.4	128.3	101
FALSE	High	Master Protein	O94929	Actin-binding LIM protein 3 OS=Homo sapiens GN=ABLIM3 PE=1 SV=3	0	16.2358	6.58858	3	26	3	1	683	77.752	8.54	Phospho [S282(98); S373(100); S503(100)]	1.103	0.657	0.855	0.796	0.726	0.769	1.03	0.943	0.769	1.001	0.931	1.005	1.041	1.041	0.843	0.835	0.855	0.847	113.7	106.1	107.3	79.2	103.6	86.9	103.1	75.4	108.2	119.5	98.1	88.2	95.8	114.8	82.5	113.9
FALSE	High	Master Protein	Q8NEY8	Periphilin-1 OS=Homo sapiens GN=PPHLN1 PE=1 SV=2	0	16.1936	6.33188	3	28	3	1	458	52.705	9.11	Phospho [S133(100)]	0.922	1.278	1.52	1.436	0.658	1.347	1.035	0.953	0.919	0.711	0.825	0.922	1.101	0.759	1.084	0.799	1.194	1.372	87.1	97.8	104	127.2	87.1	102.4	94.5	123.8	92.3	73.5	147.2	89	77.4	96.8	64	69.2
FALSE	High	Master Protein	Q7Z417	Nuclear fragile X mental retardation-interacting protein 2 OS=Homo sapiens GN=NUFIP2 PE=1 SV=1	0	16.1921	7.05036	3	25	3	1	695	76.075	8.7	Phospho [S212(100); S629(98.6); S652(100)]	1.018	1.52	0.889	1.443	0.472	1.897	0.763	0.76	1.219	0.696	0.691	0.877	1.447	0.807	1.469	0.655	1.062	0.679	84.1	63.1	119.6	156.8	72.4	121.4	82.6	155.3	77.7	82.4	90.8	124.6	66.9	102.2	54.7	80.6
FALSE	High	Master Protein	A0A024R4E5	High density lipoprotein binding protein (Vigilin), isoform CRA_a OS=Homo sapiens GN=HDLBP PE=1 SV=1	0	15.9712	6.07256	4	11	4	1	1268	141.352	6.87	Phospho [S31(100); S1252(100)]	0.914	0.893	0.921	0.702	1.211	0.943	0.871	0.816	0.988	1.236	0.855	0.867	1.097	0.823	0.848	0.75	0.927	0.756	97.8	93.2	117.4	101	92.8	90.8	107	101	92.2	93	104.2	111.7	84.8	113.1	126.8	129.4
FALSE	High	Master Protein	Q96T37	Putative RNA-binding protein 15 OS=Homo sapiens GN=RBM15 PE=1 SV=2	0	15.9559	5.01535	4	10	4	1	977	107.124	10.08	Phospho [S294(100); T568(100); S656(98.2); S670(100); S674(100)]	0.904	1.044	1.141	1.059	0.234	1.198	0.864	1.124	1.119	0.681	1.052	0.998	1.296	1.162	1.245	0.931	1.081	1.454	84.3	80.6	120.9	111.8	93.1	116.2	93.3	97.2	104.6	108.1	106.2	104.1	86.6	93.1	25	72.7
FALSE	High	Master Protein	C9JWC3	Sorbin and SH3 domain-containing protein 2 (Fragment) OS=Homo sapiens GN=SORBS2 PE=1 SV=1	0	15.887	12.6374	3	21	3	1	182	19.767	8.98	Phospho [S27(100); S40(100)]	0.854	1.05	0.675	1.007	0.39	1.007	1.593	1.212	2.142	0.921	1.876	1.413	1.001	0.532	1.026	0.625	0.631	1.087	75.7	141.2	88.8	89.3	125.3	91	88.7	101.5	117.3	51.4	65.3	207.2	60.5	96.7	39.5	93.3
FALSE	High	Master Protein	A0A1W2PPZ5	Transcription elongation factor A protein 1 OS=Homo sapiens GN=TCEA1 PE=4 SV=1	0	15.8714	8.9701	4	17	4	1	301	33.914	8.38	Phospho [S100(100)]	1.015	1.109	0.969	1.234	0.475	1.712	0.868	0.796	1.041	0.858	0.873	1.057	1.176	0.715	1.297	0.697	1.08	0.988	87.4	74.8	101.3	147.5	91.1	111.7	86.2	122.7	88	79.1	107.2	115.2	77.1	110.7	51.1	92.3
FALSE	High	Master Protein	Q8TAD8	Smad nuclear-interacting protein 1 OS=Homo sapiens GN=SNIP1 PE=1 SV=1	0	15.8436	11.8687	3	9	3	1	396	45.75	9.99	Phospho [S35(100); S52(98)]	0.874	0.866	0.844	0.692	0.32	1.052	0.983	0.918	0.673	0.479	0.586	0.883	0.978	0.583	1.085	0.823	0.582	0.779	89.2	100.4	99.9	107.4	90.1	110.8	102.1	106.2	112.7	71.5	103.5	82.5	101	122.7	50.4	75.6
FALSE	High	Master Protein	A0A0G2JMX7	Microtubule-associated protein OS=Homo sapiens GN=MAPT PE=1 SV=1	0	15.7228	4.63918	3	19	3	1	776	80.866	7.11	Phospho [S534(96)]	0.854	1.136	0.538	3.664	0.561	1.621	0.635	0.977	0.88	0.661	0.943	0.909	0.751	0.577	1.183	0.56	0.99	1.246	85.9	63.9	75.6	163.2	91.5	119.1	100.7	140.3	120.6	71.3	66.4	108.7	69.1	123.5	43.3	51
FALSE	High	Master Protein	Q9BUJ2	Heterogeneous nuclear ribonucleoprotein U-like protein 1 OS=Homo sapiens GN=HNRNPUL1 PE=1 SV=2	0	15.7028	9.11215	3	27	3	1	856	95.679	6.92	Phospho [S194(100); S512(100); S718(98.3)]	0.974	0.89	1.19	0.672	2.147	0.945	0.778	0.88	0.855	1.341	0.62	0.685	1.038	1.018	1.049	0.789	0.647	0.91	105.4	84.2	112.3	102.2	74.2	113.5	108.2	94.1	93	107.6	125.8	90.4	83.4	105.7	204.9	127.9
FALSE	High	Master Protein	O00499	Myc box-dependent-interacting protein 1 OS=Homo sapiens GN=BIN1 PE=1 SV=1	0	15.7022	3.20405	2	42	2	1	593	64.659	5.06	Phospho [S296(99.1)]	1.012	1.203	0.849	0.769	0.951	0.774	1.008	0.92	1.019	1.001	0.985	0.911	0.907	0.932	0.771	0.84	0.753	0.615	111	110.6	99.5	84.8	99.9	84.5	109.7	124.5	95.2	96.5	87.9	105.5	87	103.5	109.6	115.4
FALSE	High	Master Protein	Q15154	Pericentriolar material 1 protein OS=Homo sapiens GN=PCM1 PE=1 SV=4	0	15.6848	3.16206	4	13	4	1	2024	228.392	5.02	Phospho [S65(100); S872(100)]	1.09	1.103	0.908	0.8	1.531	0.941	0.83	0.598	0.729	0.927	0.72	0.854	1.173	0.766	0.978	0.579	1.454	0.756	111.2	84.6	119.6	95.9	87	99.7	102	135.8	73.7	94.3	111.9	89.8	71.4	123.2	149.1	90.3
FALSE	High	Master Protein	Q9UGP4	LIM domain-containing protein 1 OS=Homo sapiens GN=LIMD1 PE=1 SV=1	0	15.5128	12.574	4	17	4	1	676	72.144	6.65	Phospho [S145(100); S277(97.4); S316(97.5)]	0.689	1.576	0.661	0.762	0.334	1.028	1.371	1.138	1.413	1.152	1.577	1.124	0.771	0.836	1.439	1.016	0.84	0.99	65	129.3	72.7	97	106	135.7	94.3	144.4	104.3	76.6	60.5	129.5	93.1	91.6	35.2	121.2
FALSE	High	Master Protein	A0A0A0MR66	RNA binding motif protein 10, isoform CRA_d OS=Homo sapiens GN=RBM10 PE=1 SV=1	0	15.5113	4.22111	3	21	3	1	995	110.299	6.28	Phospho [S154(99.9); S788(100); S801(98.2)]	0.872	1.07	1.4	1.029	0.973	0.996	1.065	0.948	0.945	0.874	0.937	0.913	1.045	0.871	0.923	1.031	1.002	1.041	89.6	109.4	107.4	102.3	93.8	94.8	102.7	103.1	91.3	84	134.9	91	99.3	96.4	99.3	89.3
FALSE	High	Master Protein	Q16822	Phosphoenolpyruvate carboxykinase [GTP], mitochondrial OS=Homo sapiens GN=PCK2 PE=1 SV=3	0	15.3614	7.1875	4	14	4	1	640	70.685	7.62	Phospho [S304(100)]	0.967	0.637	0.547	0.683	0.839	1.144	1.246	1.468	1.052	1.146	2.627	1.401	1.024	0.708	1.191	0.659	0.763	0.423	84.9	109.4	89.9	100.5	123	104.6	87.8	73.5	169.2	81.6	63	121.3	76	115.3	78.5	107.3
FALSE	High	Master Protein	Q5JRA6	Melanoma inhibitory activity protein 3 OS=Homo sapiens GN=MIA3 PE=1 SV=1	0	15.2537	4.98165	4	9	4	1	1907	213.57	4.84	Phospho [S727(100); S1906(99.9)]	0.961	1.292	1.301	0.807	0.903	0.784	0.875	0.685	1.064	1.018	0.684	0.792	0.868	1.359	0.953	0.805	0.777	0.905	108	98.2	97.5	88	88.9	107	112.3	120.5	63.9	126.7	121.3	99.3	75.1	93.3	103.7	117
FALSE	High	Master Protein	J3KNL6	Protein transport protein Sec16A OS=Homo sapiens GN=SEC16A PE=1 SV=1	0	15.2248	3.43657	4	19	4	1	2357	251.738	5.8	Phospho [S569(98.4); S1069(100); S1327(97)]	1.01	0.939	0.855	0.667	1.044	0.863	0.857	0.776	0.745	0.933	0.848	0.764	0.835	0.976	0.87	0.849	0.863	0.886	114	96.8	94.3	97.5	86.2	98.3	112.9	107.1	88.5	111.3	97.5	85	96.8	114	117.1	104.6
FALSE	High	Master Protein	Q0ZGT2	Nexilin OS=Homo sapiens GN=NEXN PE=1 SV=1	0	15.1701	5.77778	3	19	3	1	675	80.609	5.33	Phospho [S80(100); S365(100)]	0.872	0.883	0.702	0.544	1.881	0.651	1.319	1.066	1.136	1.032	1.789	1.011	0.644	1.186	0.582	1.25	0.543	0.599	100.5	151.9	74.2	75	116.4	67	115.1	85.6	103.4	114.9	68	110.1	121.1	96.9	178.2	97.8
FALSE	High	Master Protein	P29536	Leiomodin-1 OS=Homo sapiens GN=LMOD1 PE=1 SV=3	0	15.1455	9.16667	5	14	5	1	600	66.989	9.33	Phospho [S12(100); S85(100); S119(100)]	0.832	0.88	0.857	0.795	1.301	0.714	1.041	0.994	0.785	0.905	0.732	0.672	0.626	1.438	0.772	1.898	0.786	0.739	103	128.8	77.4	88.4	83.1	95.6	123.7	78.5	88.6	128.2	76.4	70	169.2	89.1	145.5	101.2
FALSE	High	Master Protein	Q9Y5S9	RNA-binding protein 8A OS=Homo sapiens GN=RBM8A PE=1 SV=1	0	15.1447	16.092	3	8	3	1	174	19.877	5.72	Phospho [S42(100)]	0.97	1.241	1.229	1.109	0.513	0.923	0.999	1.204	1.045	0.932	0.911	1.014	1.112	0.646	0.842	0.965	1.196	1.416	98.9	101.9	113.4	94.2	103.5	85.9	102	118.5	115	61.7	117.4	99.8	92.2	95.5	50.7	92.2
FALSE	High	Master Protein	Q96CV9	Optineurin OS=Homo sapiens GN=OPTN PE=1 SV=2	0	15.1394	6.58579	3	17	3	1	577	65.88	5.24	Phospho [S177(100); S198(100)]	0.836	0.862	0.957	0.807	0.876	1.422	0.902	0.866	0.893	0.908	0.598	1.015	0.827	1.009	1.189	0.966	0.875	0.598	81.3	87.8	80.5	138.5	98.8	115.7	97.3	92	92.5	107.8	102.2	95.4	103.2	106.8	108.3	112.3
FALSE	High	Master Protein	Q9Y478	5'-AMP-activated protein kinase subunit beta-1 OS=Homo sapiens GN=PRKAB1 PE=1 SV=4	0	15.131	11.8519	2	24	2	1	270	30.363	6.4	Phospho [S96(100); S108(100)]	1.312	1.094	0.979	0.805	0.893	1.253	1.09	0.898	0.993	1.192	0.837	0.996	1.365	0.829	1.225	0.62	1.189	0.706	111.4	92.6	116	106.4	84.6	104.1	84.9	119.4	98	90.4	106.9	108.4	67.7	109.2	94.4	126
FALSE	High	Master Protein	O94826	Mitochondrial import receptor subunit TOM70 OS=Homo sapiens GN=TOMM70 PE=1 SV=1	0	15.1288	3.94737	1	8	1	1	608	67.412	7.12	Phospho [S91(100)]	1.319	0.669	1.115	1.399	0.681	1.055	1.101	1.023	0.693	1.147	1.027	1.139	1.196	1.249	1.126	1.502	0.841	1.587	116.4	97.1	105.5	93	100.4	99.3	88.2	64.6	98.7	120.6	107.6	66.9	145	96.5	62	104.5
FALSE	High	Master Protein	P13796	Plastin-2 OS=Homo sapiens GN=LCP1 PE=1 SV=6	0	15.0739	6.06061	3	17	3	1	627	70.244	5.43	Phospho [S5(100); S257(100)]	1.643	0.451	0.724	0.484	0.847	0.683	0.943	1.091	1.047	2.031	0.985	1.345	0.97	1.192	0.892	1.142	1.129	0.788	153.9	88.3	90.8	63.9	126	83.5	93.6	47.5	114.9	125.5	76.3	110.3	120.3	105.3	81.6	195.7
FALSE	High	Master Protein	Q6ZRV2	Protein FAM83H OS=Homo sapiens GN=FAM83H PE=1 SV=3	0	15.0513	6.10687	5	11	5	1	1179	127.044	6.98	Phospho [S523(100); S892(100); S914(100); S1003(100); S1771(100); S1771(100); S1771(100)]	0.894	0.853	0.772	0.926	0.715	0.921	0.919	1.127	0.753	0.944	0.891	0.825	0.94	0.706	1.063	0.852	0.814	1.117	95.4	98	100.3	98.3	88	113.4	106.7	98.4	130.1	81.6	89.2	86.9	98.3	115.5	78.1	103.2
FALSE	High	Master Protein	Q00587	Cdc42 effector protein 1 OS=Homo sapiens GN=CDC42EP1 PE=1 SV=1	0	15.0288	10.2302	4	13	4	1	391	40.27	7.15	Phospho [S121(100); S192(100); S350(100)]	0.958	1.212	0.877	1.068	0.5	0.759	1.209	1.117	1.128	1.146	1.045	0.894	0.864	0.985	0.701	0.856	0.625	1.208	105.1	132.5	94.7	83.2	98	76.9	109.6	118.3	109	96.1	85.6	110.1	83.5	97.5	53.1	121.7
FALSE	High	Master Protein	A0A087WZE9	High mobility group nucleosome-binding domain-containing protein 3 OS=Homo sapiens GN=HMGN3 PE=1 SV=1	0	14.957	23.8462	4	10	4	1	130	13.948	9.91	Phospho [S6(99.9); S78(100)]	0.693	1.329	0.977	1.145	0.505	1.267	1.051	1.284	1.109	0.793	1.082	1.433	0.802	1.081	1.235	1.04	0.827	1.152	64.8	98.3	75.1	118.6	134.1	115.6	93.6	118.9	114.9	96.8	87.4	99.3	93.1	89.5	54.4	85.3
FALSE	High	Master Protein	Q86X29	Lipolysis-stimulated lipoprotein receptor OS=Homo sapiens GN=LSR PE=1 SV=4	0	14.8354	5.39291	4	16	4	1	649	71.394	7.97	Phospho [S493(100); S530(100)]	1.022	1.193	0.827	0.903	0.858	0.728	0.906	1.067	0.91	1.046	0.983	0.874	1.119	0.902	0.749	0.839	1.135	0.904	111.8	99.2	122.4	79.7	95.6	81.9	109.4	123.9	110.9	93.7	85.9	94.5	87.1	103.9	88	107.2
FALSE	High	Master Protein	P85037	Forkhead box protein K1 OS=Homo sapiens GN=FOXK1 PE=1 SV=1	0	14.728	9.82265	4	12	4	1	733	75.411	9.32	Phospho [S213(100); S223(100); S257(99.9); S416(100); S420(100); S445(100)]	1.163	1.064	1.528	1.172	1.087	1.033	1.007	0.925	0.96	1.263	1.167	0.818	1.028	1.204	0.88	0.798	1.046	1.031	117.5	101.8	103.8	104.3	82.7	88.9	101	99.5	86.6	112.7	143	89.8	74.7	93.6	98	113.9
FALSE	High	Master Protein	P20962	Parathymosin OS=Homo sapiens GN=PTMS PE=1 SV=2	0	14.6701	22.549	3	8	3	1	102	11.523	4.16	Phospho [S13(100)]	0.793	1.063	0.857	0.808	0.542	0.976	1.021	1.028	1.443	1.331	2.294	1.102	0.85	0.813	1.025	0.928	0.796	0.69	82	105.6	87.9	101	114	106	103.4	104.3	100.9	79.8	84.1	141.6	91.1	98.1	50.8	124.8
FALSE	High	Master Protein	Q8WX93	Palladin OS=Homo sapiens GN=PALLD PE=1 SV=3	0	14.6572	2.45842	3	16	3	1	1383	150.47	7.09	Phospho [S893(100); S1104(100); S1121(100)]	1.588	0.722	0.736	0.896	1.239	0.552	0.682	0.817	0.775	0.982	0.856	0.713	0.525	1.773	0.615	1.766	0.852	1.008	195.9	84.2	64.7	68.1	88	75.9	123.3	66.6	75.4	163.5	67.9	71.5	162.9	92.2	126.9	100.6
FALSE	High	Master Protein	Q5VUA4	Zinc finger protein 318 OS=Homo sapiens GN=ZNF318 PE=1 SV=2	0	14.6233	2.23782	5	24	5	1	2279	250.958	7.2	Phospho [S79(100); S81(100); S89(100); S91(100); S136(100); S527(100)]	0.819	1.005	0.996	1.002	0.35	0.996	0.898	1.056	0.81	0.761	0.89	0.811	0.996	0.879	1.099	0.943	1.042	1.111	86.6	94.9	105.3	105.3	85.8	116.3	105.8	105.2	110.5	92	104.2	84.8	98.7	104.6	39.8	86.5
FALSE	High	Master Protein	Q99959	Plakophilin-2 OS=Homo sapiens GN=PKP2 PE=1 SV=2	0	14.5886	6.35641	4	13	4	1	881	97.355	9.33	Phospho [S82(97.8); S135(100); S251(100)]	1.437	1.559	0.481	0.681	0.5	1.366	1.14	1.077	1.5	0.795	1.088	1.155	1.181	0.602	1.212	0.712	0.918	0.608	118.5	94	97.3	112.6	95.2	99.9	82.4	157.5	108.7	60.8	48.6	151.5	71.9	101	62.7	99.5
FALSE	High	Master Protein	P51608	Methyl-CpG-binding protein 2 OS=Homo sapiens GN=MECP2 PE=1 SV=1	0	14.5403	6.3786	2	18	2	1	486	52.409	9.95	Phospho [S80(100)]	0.979	0.744	1.161	0.748	1.281	0.809	1.464	0.96	0.928	1.323	0.888	1.087	0.885	1.06	0.867	0.83	1.205	0.826	96.6	144.5	87.4	79.9	107.3	85.5	98.7	77.9	100.5	111	121.6	97.2	87	104.7	123.4	127.4
FALSE	High	Master Protein	Q01130	Serine/arginine-rich splicing factor 2 OS=Homo sapiens GN=SRSF2 PE=1 SV=4	0	14.3853	19.0045	3	22	3	1	221	25.461	11.85	Phospho [S191(100); S208(92.9)]	0.87	1.173	1.132	1.91	0.398	1.285	1.038	1.149	0.918	0.853	1.096	0.941	0.847	0.708	1.305	0.801	0.888	1.143	83.6	99.7	81.4	123.5	90.4	125.4	96.1	119.4	116.9	72	115.1	93.4	81.5	101.7	38.2	81.9
FALSE	High	Master Protein	Q05519	Serine/arginine-rich splicing factor 11 OS=Homo sapiens GN=SRSF11 PE=1 SV=1	0	14.3305	10.9504	4	12	4	1	484	53.51	10.52	Phospho [S207(100); S434(100); S483(100)]	0.891	1.512	1.259	1.923	0.554	1.511	1.097	1.152	1.045	0.69	0.737	1.069	1.102	0.762	1.351	0.978	1.216	1.791	77.7	95.8	96.1	131.9	93.3	117.9	87.3	137.3	104.7	69.2	114.3	94.9	88.8	90.8	49	61.1
FALSE	High	Master Protein	P01008	Antithrombin-III OS=Homo sapiens GN=SERPINC1 PE=1 SV=1	0	14.3263	3.66379	2	12	2	1	464	52.569	6.71	Phospho [S68(100)]	0.816	0.98	0.945	0.981	0.685	0.759	0.966	1.047	1.133	0.851	1.373	0.989	0.81	1.16	0.867	0.997	1.103	0.973	92	109	91.4	85.6	111.5	97.7	112.8	94.4	100.9	111.9	91.1	109.2	96.1	96.4	68.8	85.5
FALSE	High	Master Protein	Q9Y2V2	Calcium-regulated heat-stable protein 1 OS=Homo sapiens GN=CARHSP1 PE=1 SV=2	0	14.2907	12.9252	3	24	3	1	147	15.882	8.21	Phospho [S30(100); S41(100)]	0.712	1.835	0.569	0.711	0.904	1.592	0.765	1.431	2.21	0.738	2.059	1.001	1.035	0.629	0.806	0.659	0.754	0.53	72.1	77.5	104.9	161.2	101.4	81.6	101.3	154.1	120.2	52.9	47.8	185.7	55.4	84	94.6	77.1
FALSE	High	Master Protein	O60701	UDP-glucose 6-dehydrogenase OS=Homo sapiens GN=UGDH PE=1 SV=1	0	14.2782	5.06073	3	15	3	1	494	54.989	7.12	Phospho [S476(100)]	1.259	0.854	0.628	0.994	0.828	1.586	1.11	1.119	1.194	0.995	2.026	1.667	1.568	0.712	1.04	0.709	1.075	0.89	95.5	84.2	118.9	120.3	126.4	78.9	75.9	96.2	126	80.2	70.7	134.5	79.9	112.6	74.2	89.2
FALSE	High	Master Protein	O75569	Interferon-inducible double-stranded RNA-dependent protein kinase activator A OS=Homo sapiens GN=PRKRA PE=1 SV=1	0	14.274	8.6262	3	15	3	1	313	34.383	8.41	Phospho [S18(98.8); S167(100)]	0.856	1.135	1.416	1.379	0.962	0.922	1.043	0.84	1.088	1.174	1.188	0.896	0.735	1.061	0.958	1.141	0.784	0.781	93.5	113.9	80.3	100.7	97.8	104.6	109.2	103.4	76.6	96.7	129	99.1	104	91.1	92.6	113.1
FALSE	High	Master Protein	P23497	Nuclear autoantigen Sp-100 OS=Homo sapiens GN=SP100 PE=1 SV=3	0	14.229	10.1251	4	16	4	1	879	100.354	8.22	Phospho [S18(100); S171(100); S410(97.8)]	0.926	1.038	0.84	0.685	1.123	0.665	0.884	0.916	0.906	1.089	1.151	0.839	0.938	1.156	0.686	0.904	0.969	0.548	109.1	104.2	110.5	78.4	99	80.9	117.9	107.5	94.9	119.7	87	93.8	93.6	103.5	119.8	116.1
FALSE	High	Master Protein	B7Z2R7	Acyl-CoA-binding domain-containing protein 5 OS=Homo sapiens GN=ACBD5 PE=1 SV=1	0	14.161	11.0899	5	13	5	1	523	58.755	5.26	Phospho [T170(97.1); S185(98.5); S204(100); S407(100)]	0.833	1.476	0.322	1.584	0.404	1.076	0.997	0.907	1.06	0.637	0.938	1.02	0.996	0.338	1.201	0.349	0.938	1.6	81.9	98	97.9	105.7	100.2	118	98.3	189.5	116.4	43.4	41.4	136.1	44.8	128.4	39.8	62.8
FALSE	High	Master Protein	A0A0A0MT60	Peptidylprolyl isomerase (Fragment) OS=Homo sapiens GN=FKBP15 PE=1 SV=1	0	14.1504	4.18006	3	16	3	1	1244	136.189	5.21	Phospho [S371(100); S981(100); S1187(98.4)]	1.047	0.846	0.975	0.852	0.79	1.15	0.938	1.016	0.95	1.117	0.712	0.866	1.024	1.055	1.285	1.011	1.054	0.832	100.3	89.8	98.1	110.2	82.9	123	95.7	86.4	103.7	107.8	99.6	97	103.3	102.2	87	123
FALSE	High	Master Protein	G3V3A4	SNW domain-containing protein 1 OS=Homo sapiens GN=SNW1 PE=1 SV=1	0	13.9961	2.62697	1	20	1	1	571	65.351	9.67	Phospho [S224(100)]	0.775	0.944	1.405	0.945	0.563	0.867	0.868	0.921	0.985	1.073	0.988	0.774	0.833	0.981	0.862	0.955	0.922	1.128	90.7	101.6	97.6	101.5	90.7	101	117.1	91.9	89.6	95.5	136.8	95.9	93	97.3	59.6	113.5
FALSE	High	Master Protein	Q13435	Splicing factor 3B subunit 2 OS=Homo sapiens GN=SF3B2 PE=1 SV=2	0	13.9184	7.3743	3	9	3	1	895	100.165	5.67	Phospho [S362(99.2)]	0.901	0.873	0.94	0.952	1.308	0.93	0.81	0.888	1.062	0.923	0.944	0.846	1.13	1.166	0.997	0.968	0.914	0.992	95.4	85.7	119.6	98.4	89.5	105.5	105.8	88.6	90.1	118.4	95.4	107.8	98.2	101.5	130.2	91.9
FALSE	High	Master Protein	P08708	40S ribosomal protein S17 OS=Homo sapiens GN=RPS17 PE=1 SV=2	0	13.8573	40.7407	3	10	3	1	135	15.54	9.85	Phospho [S113(100)]	1.168	0.37	1.233	0.534	1.486	0.878	0.998	0.499	0.843	1.791	0.597	0.841	1.113	0.843	0.969	0.998	0.5	0.364	117.3	100.3	111.8	88.2	84.5	97.4	100.5	44.7	60.4	102	149.2	102	120.8	121	165.8	199.9
FALSE	High	Master Protein	O76021	Ribosomal L1 domain-containing protein 1 OS=Homo sapiens GN=RSL1D1 PE=1 SV=3	0	13.8271	7.7551	3	25	3	1	490	54.939	10.13	Phospho [S361(100); S421(100); S443(100)]	1.331	0.907	1.316	1.101	0.911	1.178	0.908	0.88	0.998	0.889	0.68	0.95	1.238	0.832	1.114	0.996	1.278	1.48	120.7	82.4	112.3	106.8	86.1	101.1	90.7	91.6	88.9	84	132.9	100.8	100.7	101	86.9	84.8
FALSE	High	Master Protein	O95817	BAG family molecular chaperone regulator 3 OS=Homo sapiens GN=BAG3 PE=1 SV=3	0	13.7972	8	2	17	2	1	575	61.557	6.95	Phospho [S173(100); S386(99.8)]	0.98	1.013	1	1.184	1.084	0.971	0.938	1.169	1.318	0.978	0.892	1.041	0.869	1.024	1.021	0.939	1.138	0.961	100.6	96.3	89.2	99.7	106.8	104.8	102.7	95	109.6	96	93.8	123.7	88.1	93.8	104.9	94.6
FALSE	High	Master Protein	Q32MZ4	Leucine-rich repeat flightless-interacting protein 1 OS=Homo sapiens GN=LRRFIP1 PE=1 SV=2	0	13.7757	8.29208	4	87	4	1	808	89.199	4.65	Phospho [T114(96.6); S120(100)]	0.968	0.941	0.966	0.858	0.89	0.854	0.953	0.962	0.97	0.97	0.787	0.904	0.98	1.035	0.899	0.894	0.857	0.866	103.3	101.8	104.6	91.1	96.5	96	106.7	97.3	99.5	107.1	99.9	100.3	92.5	103.4	100	109.1
FALSE	High	Master Protein	Q0VF96	Cingulin-like protein 1 OS=Homo sapiens GN=CGNL1 PE=1 SV=2	0	13.7509	1.84332	3	14	3	1	1302	148.989	5.67	Phospho [S283(100); T513(98.1)]	0.749	1.165	0.788	0.822	0.494	0.996	1.017	1.072	1.709	0.866	1.152	0.925	0.836	0.737	0.915	0.775	0.88	0.842	81.4	110.6	90.9	108.3	100.5	99.5	108.7	112.6	103.5	71.2	76.1	165.1	74.8	96.6	57.1	100.1
FALSE	High	Master Protein	Q9BXP5	Serrate RNA effector molecule homolog OS=Homo sapiens GN=SRRT PE=1 SV=1	0	13.6884	4.68037	4	16	4	1	876	100.604	5.96	Phospho [S67(100); S74(100); T544(94)]	1.077	1.023	1.165	1.398	0.349	1.34	0.965	0.928	1.038	1.022	1.351	1.16	1.08	1.144	1.275	0.87	0.978	1.175	95.5	85.5	95.8	118.8	102.8	113	88.6	99.9	90.6	111.8	113.8	101.4	85	97.7	33.6	98.3
FALSE	High	Master Protein	Q15942	Zyxin OS=Homo sapiens GN=ZYX PE=1 SV=1	0	13.6131	5.76923	3	17	3	1	572	61.238	6.67	Phospho [S344(100)]	1.041	1.477	0.699	0.421	2.616	0.792	0.892	1.007	1.133	1.429	0.79	0.962	0.778	1.263	0.925	1.043	0.648	0.367	114	97.7	85.2	86.7	105.4	101.4	109.6	135.6	92.5	116	64.2	104	95.8	91.8	251.8	137.5
FALSE	High	Master Protein	Q8WVC0	RNA polymerase-associated protein LEO1 OS=Homo sapiens GN=LEO1 PE=1 SV=1	0	13.5776	5.85586	4	17	4	1	666	75.359	4.51	Phospho [S140(100); S162(100); S279(100)]	0.857	0.941	0.914	1.392	0.617	1.518	0.878	0.838	0.776	0.799	0.781	0.89	0.95	0.637	1.13	0.755	0.94	1.339	83.1	85.1	92.1	147.1	86.2	109.5	96.9	112.4	100.1	76.1	109.2	92.6	90.2	119.5	62.8	81.4
FALSE	High	Master Protein	X6RLX0	ELKS/Rab6-interacting/CAST family member 1 OS=Homo sapiens GN=ERC1 PE=1 SV=1	0	13.464	2.85714	3	14	3	1	1120	128.396	5.97	Phospho [S21(100); S37(98.5)]	0.868	1.795	0.981	0.798	0.551	1.199	0.913	1.202	1.195	1.037	1.141	0.944	0.818	0.755	1.109	0.906	0.978	0.951	88.7	93.3	83.6	122.5	96.4	113.4	102.2	160.4	107.4	67.5	87.6	106.8	81	89.4	59.8	112.4
FALSE	High	Master Protein	P42566	Epidermal growth factor receptor substrate 15 OS=Homo sapiens GN=EPS15 PE=1 SV=2	0	13.4627	8.25893	4	13	4	1	896	98.595	4.64	Phospho [S796(100); S814(100)]	0.891	1.246	1.033	1.106	0.907	0.863	0.984	0.792	1.189	1.216	0.921	0.972	0.741	0.96	0.785	0.901	0.907	0.537	100	110.5	83.2	96.8	109.2	88.1	112.3	122.5	77.8	94.4	101.5	116.9	88.5	98.3	96.3	129.1
FALSE	High	Master Protein	Q9H3N1	Thioredoxin-related transmembrane protein 1 OS=Homo sapiens GN=TMX1 PE=1 SV=1	0	13.4431	7.5	2	7	2	1	280	31.771	4.98	Phospho [S247(100)]	1.077	0.514	0.933	0.579	2.179	0.663	0.904	0.724	0.578	1.45	0.845	0.84	0.904	1.125	0.764	1.061	0.623	0.767	122.6	102.8	102.8	75.5	95.6	86.9	113.8	60.7	85.4	132.6	110.1	68.2	125.2	117.9	204.9	136.4
FALSE	High	Master Protein	F8VXC8	SWI/SNF complex subunit SMARCC2 OS=Homo sapiens GN=SMARCC2 PE=1 SV=1	0	13.3177	3.61446	4	10	4	1	1245	136.1	5.71	Phospho [S283(100); S302(100); S304(97.9); S347(100)]	0.939	0.974	0.902	0.786	1.294	1.003	1.21	1.031	1.778	0.938	0.813	1.198	1.068	0.785	0.988	0.825	0.929	1.092	88.8	114.4	100.9	94.8	113.3	93.4	94.5	93.5	99	75.3	86.5	170.6	79.2	96	132.2	95.8
FALSE	High	Master Protein	Q14980	Nuclear mitotic apparatus protein 1 OS=Homo sapiens GN=NUMA1 PE=1 SV=2	0	13.2614	2.55319	3	13	3	1	2115	238.115	5.78	Phospho [S1757(100)]	1.041	0.759	1.259	0.595	1.242	0.744	1.035	0.897	0.629	1.377	0.686	0.844	0.838	1.039	0.797	0.927	0.804	0.779	115.7	115	93.1	82.7	93.8	88.5	111.1	81.6	96.5	111.7	135.3	67.7	99.6	107.5	134.1	148.7
FALSE	High	Master Protein	Q7Z6Z7	E3 ubiquitin-protein ligase HUWE1 OS=Homo sapiens GN=HUWE1 PE=1 SV=3	0	13.092	1.34888	3	12	3	1	4374	481.589	5.22	Phospho [S1907(100); T2889(96)]	1.024	0.792	1.178	0.633	1.411	0.945	0.982	0.668	0.687	1.121	0.72	0.83	0.884	1.175	0.907	0.951	0.613	0.737	109.1	104.6	94.1	100.7	88.4	96.6	106.5	86	72.5	127.5	127.8	74.6	103.2	108.5	158.4	125.9
FALSE	High	Master Protein	Q99442	Translocation protein SEC62 OS=Homo sapiens GN=SEC62 PE=1 SV=1	0	13.0805	14.5363	4	10	4	1	399	45.833	7.12	Phospho [T158(100); S335(100)]	0.863	0.85	1.219	1.131	0.709	1.012	1.163	1.033	0.784	1.242	1.01	1.167	1.277	1.028	1.118	1.243	0.929	1.216	79.5	107.1	117.6	93.2	107.5	103	92.1	83.2	101.1	100.5	119.2	76.7	121.6	97.8	68.6	120.1
FALSE	High	Master Protein	P18615	Negative elongation factor E OS=Homo sapiens GN=NELFE PE=1 SV=3	0	13.0682	11.5789	3	14	3	1	380	43.214	9.33	Phospho [S51(100); S353(100)]	1.014	1.217	1.94	0.681	0.856	1.104	0.83	0.797	0.78	0.821	0.915	0.698	0.838	1.018	0.885	0.799	1.047	0.762	111.5	91.2	92.1	121.4	76.7	97.3	109.9	112.8	73.9	94.4	179.8	72.3	74.1	92.7	98.5	94.5
FALSE	High	Master Protein	Q96TC7	Regulator of microtubule dynamics protein 3 OS=Homo sapiens GN=RMDN3 PE=1 SV=2	0	13.0395	12.5532	2	20	2	1	470	52.086	5.1	Phospho [S46(99.9); S212(100)]	1.019	0.736	0.951	0.601	1.003	0.857	0.828	0.662	0.745	1.308	0.785	0.748	1.175	0.986	1.005	1.034	1.614	0.975	107.6	87.4	124	90.4	79	106	105.5	84.3	75.8	112.9	108.9	85.3	118.4	114.5	96.3	125.7
FALSE	High	Master Protein	Q96B97	SH3 domain-containing kinase-binding protein 1 OS=Homo sapiens GN=SH3KBP1 PE=1 SV=2	0	12.954	7.06767	3	9	3	1	665	73.082	6.62	Phospho [S108(100); S183(100); S230(100)]	0.425	1.125	1.293	1.118	0.668	0.501	0.611	1.072	0.909	0.89	0.562	0.579	0.383	0.999	0.72	0.814	0.878	1.059	70.5	101.3	63.5	83.1	96	119.5	166	109.2	104.1	97	125.5	88.2	79	97.1	75.7	100.9
FALSE	High	Master Protein	Q8NHG8	E3 ubiquitin-protein ligase ZNRF2 OS=Homo sapiens GN=ZNRF2 PE=1 SV=1	0	12.9313	21.4876	3	9	3	1	242	24.1	7.09	Phospho [S19(100); S82(100); S135(100)]	0.956	0.856	0.816	1.376	0.34	0.944	0.832	0.981	0.992	0.637	1.036	0.878	0.796	0.821	0.891	0.8	0.961	1.32	106.2	92.5	88.5	105	97.6	99.1	111.2	95.7	109.6	91.7	91.1	110.9	89.4	111.7	35.7	66.8
FALSE	High	Master Protein	Q01105	Protein SET OS=Homo sapiens GN=SET PE=1 SV=3	0	12.8477	18.6207	4	14	4	1	290	33.469	4.32	Phospho [S7(100)]	0.9	0.694	0.972	1.297	0.361	1.246	1.034	0.707	0.803	0.802	0.896	0.952	1.164	1.032	1.246	0.813	1.577	1.028	83.5	96	108.1	115.7	88.4	115.6	92.8	80.7	82.2	120	113	93.3	94.5	116.3	36.3	80.7
FALSE	High	Master Protein	J3KTL2	Serine/arginine-rich-splicing factor 1 OS=Homo sapiens GN=SRSF1 PE=1 SV=1	0	12.8413	7.90514	2	22	2	1	253	28.312	10.08	Phospho [S199(100)]	0.803	1.293	1.149	1.579	0.527	1.204	1.022	1.126	0.97	0.78	1.054	0.962	1.014	0.833	1.259	1.046	1.166	1.546	77.4	98.5	97.8	116.1	92.7	121.3	96.4	122	106.3	78.6	108.5	91.5	98.7	94.4	48.2	71.4
FALSE	High	Master Protein	Q14498	RNA-binding protein 39 OS=Homo sapiens GN=RBM39 PE=1 SV=2	0	12.8363	8.11321	3	17	3	1	530	59.343	10.1	Phospho [S97(100); S136(100)]	0.82	0.984	1.382	1.171	0.441	0.84	1.068	0.793	0.881	0.735	0.672	0.925	0.837	0.764	0.912	0.796	1.009	1.144	89.7	116.8	91.5	91.9	101.2	99.7	109.4	104.3	84.1	81	146.6	93.4	84.5	106.1	50	83.4
FALSE	High	Master Protein	P36871	Phosphoglucomutase-1 OS=Homo sapiens GN=PGM1 PE=1 SV=3	0	12.7735	12.0996	4	14	4	1	562	61.411	6.76	Phospho [T115(98.2)]	0.997	0.693	0.82	0.75	0.911	0.725	0.886	0.93	0.704	1.225	0.911	0.863	0.774	0.918	0.727	1.014	0.938	0.873	116.8	103.9	90.7	84.9	101.2	85.2	117.2	79.8	107.1	105.7	94.5	81	116.8	115.2	96.5	129.7
FALSE	High	Master Protein	O95400	CD2 antigen cytoplasmic tail-binding protein 2 OS=Homo sapiens GN=CD2BP2 PE=1 SV=1	0	12.7406	8.5044	3	18	3	1	341	37.623	4.61	Phospho [S195(98.8)]	0.912	1.217	1.762	1.506	0.331	1.328	0.882	1.111	1.003	0.72	0.978	1.02	1.396	1.123	1.227	1.314	1.51	1.298	82.2	79.5	125.9	119.7	92	110.6	90.2	99.9	91.2	92.2	144.6	82.3	107.8	82.1	31.5	68.7
FALSE	High	Master Protein	P48681	Nestin OS=Homo sapiens GN=NES PE=1 SV=2	0	12.7109	4.4417	4	35	4	1	1621	177.332	4.36	Phospho [S578(100); S680(100); S768(100); S1445(100)]	0.945	1.082	1.576	0.841	0.656	0.585	0.858	0.798	0.813	1.084	0.626	0.715	0.78	1.265	0.62	1.317	0.697	0.746	120.3	109.2	99.2	74.4	90.9	78.9	127.2	96.5	71.2	112.8	140.5	72.5	117.4	89.2	81.2	134.3
FALSE	High	Master Protein	Q12906	Interleukin enhancer-binding factor 3 OS=Homo sapiens GN=ILF3 PE=1 SV=3	0	12.6328	5.03356	3	7	3	1	894	95.279	8.76	Phospho [S382(100)]	1.152	1.11	2.057	0.61	2.11	1.029	0.893	0.784	0.741	1.302	0.731	0.929	1.019	0.775	1.215	0.953	0.817	1.096	111.4	86.4	98.5	99.5	89.8	117.6	96.7	104.7	74	73.1	194.1	69.9	89.9	94.3	192.7	118.9
FALSE	High	Master Protein	Q9UEY8	Gamma-adducin OS=Homo sapiens GN=ADD3 PE=1 SV=1	0	12.6178	4.53258	3	22	3	1	706	79.105	6.32	Phospho [S681(96.6)]	0.816	1.145	1.044	0.932	0.554	0.522	0.868	0.842	1.064	1.05	1.161	0.994	0.761	1.012	0.557	0.993	0.671	0.868	103.5	110.1	96.6	66.2	126.1	70.7	126.9	112.9	83.1	99.8	102.9	104.9	97.9	98.6	62.2	117.9
FALSE	High	Master Protein	Q96KR1	Zinc finger RNA-binding protein OS=Homo sapiens GN=ZFR PE=1 SV=2	0	12.5783	1.39665	2	8	2	1	1074	116.939	9.04	Phospho [S1054(100)]	1.239	0.582	1.43	0.78	0.79	0.901	0.986	0.805	0.65	1.008	0.617	0.91	1.129	1.434	0.956	1.285	1.038	1.134	121.8	96.9	111	88.6	89.5	93.9	98.3	56.7	78.4	139.7	139.3	63.3	125.1	97.4	86.8	110.8
FALSE	High	Master Protein	D6REX3	Protein transport protein Sec31A OS=Homo sapiens GN=SEC31A PE=1 SV=1	0	12.4653	2.79776	3	8	3	1	1251	136.141	6.98	Phospho [S799(100)]	1.212	0.632	1.06	0.956	0.678	0.997	1.169	1.07	1.096	1.374	0.787	1.023	1.082	1.133	1.185	1.012	0.821	1.032	110.6	106.7	98.8	91	93.4	108.2	91.3	63.2	107	113.2	105.9	109.6	101.2	100	71.4	144.7
FALSE	High	Master Protein	P49790	Nuclear pore complex protein Nup153 OS=Homo sapiens GN=NUP153 PE=1 SV=2	0	12.4583	4.33898	6	11	6	1	1475	153.843	8.73	Phospho [S192(100); S209(100); S334(98.5); T699(100)]	0.986	0.941	0.943	1.469	0.372	1.135	0.927	0.791	1.049	0.747	1.075	0.93	1.031	0.924	1.139	0.859	0.95	1.093	96.5	90.8	100.9	111.2	91.1	111.6	97.9	101.3	85.1	99.4	101.5	112.8	92.4	107.5	38.8	77.9
FALSE	High	Master Protein	Q9UKM9	RNA-binding protein Raly OS=Homo sapiens GN=RALY PE=1 SV=1	0	12.4336	35.6209	4	12	4	1	306	32.444	9.17	Phospho [S106(100); S135(100); S288(96.7)]	0.96	1.1	1.23	1.07	0.391	1.118	1.013	0.972	0.838	0.925	0.911	0.956	1.039	0.824	1.285	0.996	1.209	1.373	91.2	96.2	98.7	106.2	90.8	122	94.9	110.7	97.7	82.8	123.7	84.3	100.2	100.6	39.8	94.1
FALSE	High	Master Protein	O14545	TRAF-type zinc finger domain-containing protein 1 OS=Homo sapiens GN=TRAFD1 PE=1 SV=1	0	12.2976	4.63918	2	47	2	1	582	64.8	5.29	Phospho [S415(100)]	0.91	1.163	0.723	0.671	1.072	1.04	0.852	0.932	1.068	1.009	0.811	0.887	0.889	0.854	1.055	0.841	0.954	0.634	96.1	89.9	93.8	109.8	93.6	111.3	105.5	123.7	99.1	90.8	76.9	113.6	89.5	106.4	122	114.9
FALSE	High	Master Protein	P17252	Protein kinase C alpha type OS=Homo sapiens GN=PRKCA PE=1 SV=4	0	12.2828	5.20833	2	11	2	1	672	76.7	7.05	Phospho [T497(100)]	1.239	0.539	1.019	1.062	1.535	1.258	1.142	0.674	0.61	1.721	0.917	0.821	0.898	1.148	1.229	1.363	1.137	0.688	114.3	105.4	82.8	116.1	75.8	113.4	92.3	59.4	74.3	126.5	112.3	67.2	150.2	110.2	133.3	149.5
FALSE	High	Master Protein	Q15233	Non-POU domain-containing octamer-binding protein OS=Homo sapiens GN=NONO PE=1 SV=4	0	12.2673	8.06794	3	9	3	1	471	54.197	8.95	Phospho [T450(100)]	1.043	0.752	1.094	1.119	0.495	1.228	0.797	0.864	0.738	0.76	0.792	0.74	1.466	0.999	1.345	0.917	1.426	1.646	95.8	73.3	134.7	112.8	68	123.6	91.9	82.8	95	109.9	120.3	81.2	100.9	110	47.8	73.5
FALSE	High	Master Protein	O00461	Golgi integral membrane protein 4 OS=Homo sapiens GN=GOLIM4 PE=1 SV=1	0	12.2499	14.9425	4	6	4	1	696	81.831	4.77	Phospho [S364(100); Y506(100); T640(94.3)]	1.046	0.86	1.093	1.296	0.514	0.599	0.781	0.826	0.674	0.927	0.858	0.784	0.929	0.879	1.047	0.919	0.822	1.35	118.4	88.4	105.1	67.8	88.8	118.5	113.1	96.3	92.5	98.4	122.4	75.4	102.9	112	53.2	95.9
FALSE	High	Master Protein	Q14004	Cyclin-dependent kinase 13 OS=Homo sapiens GN=CDK13 PE=1 SV=2	0	12.2194	2.97619	4	9	4	1	1512	164.823	9.69	Phospho [S238(98.8); S383(100); S395(97.6); S400(100); S439(99.3)]	0.941	0.943	0.784	0.744	0.97	0.828	0.781	0.825	0.787	0.925	0.931	0.824	0.962	0.619	0.932	0.931	1.013	0.866	105.1	87.3	107.4	92.5	92	104.1	111.7	112.1	98	73.6	93.2	93.6	110.7	118.8	105.2	100.5
FALSE	High	Master Protein	O14974	Protein phosphatase 1 regulatory subunit 12A OS=Homo sapiens GN=PPP1R12A PE=1 SV=1	0	12.1395	4.95146	5	27	5	1	1030	115.211	5.4	Phospho [T696(98); S910(100)]	1.056	1.291	0.872	0.536	1.71	1.077	0.979	0.983	1.09	1.208	0.878	0.903	0.872	0.835	0.848	0.65	0.609	0.522	109.7	101.8	90.6	111.9	93.9	88.2	103.9	134.5	102.4	87	90.8	113.5	67.7	104.2	185.2	130.8
FALSE	High	Master Protein	O00193	Small acidic protein OS=Homo sapiens GN=SMAP PE=1 SV=1	0	12.0683	12.5683	1	22	1	1	183	20.32	4.72	Phospho [S17(99)]	0.854	1.114	0.897	1.128	1.297	0.955	0.701	0.898	0.652	1.226	0.821	0.746	0.861	1.152	0.981	0.69	0.879	1.091	98	80.5	98.8	109.7	85.6	112.6	114.8	121.8	98.2	125.9	98.1	71.2	75.4	109.3	122	115.3
FALSE	High	Master Protein	Q2M2I8	AP2-associated protein kinase 1 OS=Homo sapiens GN=AAK1 PE=1 SV=3	0	11.9276	3.95421	3	23	3	1	961	103.821	6.6	Phospho [T620(100); S624(98.7); S652(99.2)]	1.061	1.351	0.93	1.821	0.483	1.053	0.988	0.985	1.004	0.833	1.03	0.93	0.938	0.812	1.154	0.83	1.716	1.213	104.3	97.1	92.1	103.5	91.4	113.4	98.3	136.8	99.8	82.3	94.2	101.6	84	101.3	41.8	72
FALSE	High	Master Protein	Q5JSH3	WD repeat-containing protein 44 OS=Homo sapiens GN=WDR44 PE=1 SV=1	0	11.8887	5.14786	3	18	3	1	913	101.304	5.45	Phospho [S50(100)]	1.172	1.144	0.839	0.769	1.297	1.09	1.056	1.126	1.184	0.985	1.026	1.24	0.858	0.94	0.94	0.789	1.075	0.491	111.5	100.4	81.6	103.8	118	89.5	95.2	114	112.3	93.7	83.7	118	78.7	99.7	136.6	103.8
FALSE	High	Master Protein	Q8IXT5	RNA-binding protein 12B OS=Homo sapiens GN=RBM12B PE=1 SV=2	0	11.8676	3.4965	3	11	3	1	1001	118.03	6.81	Phospho [S250(100); S254(100); S278(100); S280(100); S638(100)]	0.963	0.831	1.626	0.94	0.349	1.013	0.971	1.013	0.779	0.78	0.887	0.804	0.994	0.98	1.007	1.062	1.061	1.136	99.9	100.6	103	105.1	83.4	104.4	103.7	79.8	97.2	94.1	156.1	74.8	102	96	39.7	88.8
FALSE	High	Master Protein	Q8N163	Cell cycle and apoptosis regulator protein 2 OS=Homo sapiens GN=CCAR2 PE=1 SV=2	0	11.7848	5.6338	2	7	2	1	923	102.838	5.22	Phospho [S678(100)]	0.977	0.602	0.945	0.663	2.173	0.788	0.793	0.632	0.491	1.146	0.581	0.813	1.121	0.938	0.882	0.867	0.792	0.849	107.3	87.1	123.1	86.6	89.3	96.9	109.8	76.9	80.8	119.9	120.9	62.8	110.8	127.9	211.1	111.4
FALSE	High	Master Protein	Q16204	Coiled-coil domain-containing protein 6 OS=Homo sapiens GN=CCDC6 PE=1 SV=2	0	11.767	2.53165	1	19	1	1	474	53.258	7.34	Phospho [S240(100); S244(100)]	1.005	0.779	1.077	0.796	1.603	1.02	0.885	0.798	0.896	0.937	0.867	0.835	0.87	1.191	0.857	1.037	0.886	0.836	108.7	95.7	94.1	110.3	90.3	92.7	108.2	80.4	82.4	123	111.2	92.6	107.1	103.3	162	94.7
FALSE	High	Master Protein	O75369	Filamin-B OS=Homo sapiens GN=FLNB PE=1 SV=2	0	11.7551	1.15296	2	15	2	1	2602	277.99	5.73	Phospho [T2110(98.6)]	1.301	1.087	0.876	0.54	0.709	0.829	1.666	1.635	1.312	1.357	1.24	1.267	0.92	1.154	0.798	1.122	0.736	0.584	117.1	149.9	82.8	74.6	114	71.8	90	92.9	139.8	98.7	74.9	112.2	96	85.5	80.5	154.1
FALSE	High	Master Protein	Q9UN36	Protein NDRG2 OS=Homo sapiens GN=NDRG2 PE=1 SV=2	0	11.7398	4.31267	2	25	2	1	371	40.772	5.21	Phospho [S332(100)]	0.713	1.027	0.744	0.717	0.541	0.706	1.022	1.012	1.547	1.204	1.049	0.979	0.772	0.722	0.773	0.944	0.735	0.796	83.6	119.9	90.7	82.9	114.9	90.7	117.3	102.8	101.3	72.3	74.4	154.8	94.4	100.1	62.7	139.5
FALSE	High	Master Protein	Q6WKZ4	Rab11 family-interacting protein 1 OS=Homo sapiens GN=RAB11FIP1 PE=1 SV=3	0	11.7284	5.92362	4	13	4	1	1283	137.083	5.43	Phospho [S199(94.2); S345(100)]	0.979	1.2	0.862	0.736	1.385	0.561	0.729	1.06	0.948	1.576	0.849	0.483	0.832	0.65	0.716	0.825	1.466	0.476	129.3	96.2	109.9	74.2	63.8	94.6	132.1	128.3	113.3	69.5	92.1	101.4	88.2	107	129.5	147.3
FALSE	High	Master Protein	Q08495	Dematin OS=Homo sapiens GN=DMTN PE=1 SV=3	0	11.7206	14.321	4	11	4	1	405	45.486	8.88	Phospho [S26(98.9); S96(100); S226(100); S333(100)]	1.093	1.161	0.945	0.684	1.139	1.056	1.094	1.424	1.728	1.256	1.059	1.187	0.959	1.073	0.824	0.941	0.843	0.774	106.1	106.2	93.1	102.5	115.2	79.9	97	98.2	120.5	90.8	80	146.2	79.6	84.6	118.1	130.1
FALSE	High	Master Protein	O00763	Acetyl-CoA carboxylase 2 OS=Homo sapiens GN=ACACB PE=1 SV=3	0	11.7013	1.50529	2	12	2	1	2458	276.365	6.49	Phospho [S72(100)]	0.714	1.387	0.778	0.613	0.464	1.806	0.852	1.156	3.134	0.664	2.043	1.319	0.806	0.594	1.074	0.748	0.708	0.806	66	78.8	74.6	166.9	121.9	99.3	92.5	110.4	92	47.3	61.9	249.4	59.5	79.6	51.6	73.8
FALSE	High	Master Protein	P29590	Protein PML OS=Homo sapiens GN=PML PE=1 SV=3	0	11.6629	4.87528	4	21	4	1	882	97.489	6.21	Phospho [S36(100); S403(100); S493(100); S518(100); S527(100)]	0.86	0.613	0.951	0.931	0.657	1.206	0.988	0.939	0.802	1.125	0.831	0.966	0.879	0.907	1.287	1.22	0.761	1.191	83.8	96.2	85.7	117.5	94.1	125.3	97.4	66.8	102.1	98.7	103.5	87.3	132.8	108.8	70.8	121.2
FALSE	High	Master Protein	O14737	Programmed cell death protein 5 OS=Homo sapiens GN=PDCD5 PE=1 SV=3	0	11.6351	19.2	3	11	3	1	125	14.276	6.04	Phospho [S119(100)]	0.998	1.181	0.907	1.456	0.832	1.179	0.944	1.08	1.245	0.974	1.028	0.998	0.854	0.903	0.887	0.874	1.279	0.987	101.9	96.4	87.1	120.3	101.8	90.5	102	115	105.2	87.9	88.3	121.2	85.1	97.4	77	90.2
FALSE	High	Master Protein	Q14767	Latent-transforming growth factor beta-binding protein 2 OS=Homo sapiens GN=LTBP2 PE=1 SV=3	0	11.5277	2.9654	3	6	3	1	1821	194.923	5.19	Phospho [S372(100)]	1.006	0.861	0.799	0.952	1.707	0.565	0.939	0.586	0.468	0.892	0.91	0.707	0.46	1.799	0.795	0.989	0.876	1.085	128.7	120.1	58.9	72.2	90.4	101.7	128	92.7	63.1	193.7	86	50.4	106.4	107.7	161	84.1
FALSE	High	Master Protein	P46100	Transcriptional regulator ATRX OS=Homo sapiens GN=ATRX PE=1 SV=5	0	11.4884	2.72873	4	15	4	1	2492	282.411	6.58	Phospho [T591(98.7); S598(100); S1996(98.2)]	1.099	0.92	2.272	0.783	0.964	0.693	0.932	0.812	0.857	0.799	0.726	0.752	0.915	1.07	0.714	0.859	1.245	0.91	126	106.9	104.9	79.4	86.2	81.9	114.7	82.6	72.9	96.2	204.2	77	77.2	89.9	105	87
FALSE	High	Master Protein	O60504	Vinexin OS=Homo sapiens GN=SORBS3 PE=1 SV=2	0	11.4854	4.91803	3	29	3	1	671	75.295	9.45	Phospho [S348(100); S544(100); S545(100)]	1.034	0.896	0.912	0.91	0.408	0.765	1.38	1.202	1.238	0.859	0.856	1.064	0.828	1.218	0.794	1.263	0.87	0.939	105.4	140.7	84.5	78	108.5	81	102	81.1	108.9	110.3	82.6	112.1	114.4	90.6	48.9	103
FALSE	High	Master Protein	P09525	Annexin A4 OS=Homo sapiens GN=ANXA4 PE=1 SV=4	0	11.4599	11.5987	3	5	3	1	319	35.86	6.13	Phospho [S12(100)]	0.791	0.619	0.93	0.742	0.949	0.746	0.745	1.151	0.647	1.457	0.502	0.729	0.672	1.162	0.792	1.361	1.344	1.361	101.1	95.3	86	95.3	93.2	101.2	127.9	63.1	117.2	118.4	94.8	65.9	138.7	101.9	90.3	138.7
FALSE	High	Master Protein	P05089	Arginase-1 OS=Homo sapiens GN=ARG1 PE=1 SV=2	0	11.3706	9.00621	3	7	3	1	322	34.713	7.21	Phospho [S62(100)]	0.848	0.802	0.883	0.724	0.692	0.985	1.199	0.579	1.448	1.03	2.322	1.337	0.906	0.994	1.045	0.81	0.873	0.732	81.1	114.7	86.7	94.2	127.8	99.9	95.6	86.2	62.2	106.7	94.9	155.5	87.1	107.4	65.7	97.8
FALSE	High	Master Protein	P01042	Kininogen-1 OS=Homo sapiens GN=KNG1 PE=1 SV=2	0	11.1264	4.19255	3	14	3	1	644	71.912	6.81	Phospho [S332(96.3)]	0.607	1.289	0.899	0.983	2.169	0.42	0.583	1.153	1.034	1.035	1.068	0.825	0.419	0.854	0.399	1.031	0.765	0.81	99.9	95.9	68.9	69.2	135.8	65.7	164.6	124.3	111.1	82.3	86.7	99.7	99.4	96.4	193.9	92.5
FALSE	High	Master Protein	Q92882	Osteoclast-stimulating factor 1 OS=Homo sapiens GN=OSTF1 PE=1 SV=2	0	10.9901	7.00935	1	15	1	1	214	23.772	5.68	Phospho [S213(100)]	0.938	1.063	0.943	0.888	1.956	0.666	0.782	0.989	1.036	1.958	1.187	0.979	0.728	1.141	0.747	0.775	0.47	0.812	112.4	93.7	87.3	79.8	117.3	89.6	119.9	107.1	99.6	114.9	95	104.4	78.1	100.8	165.5	165.7
FALSE	High	Master Protein	P08263	Glutathione S-transferase A1 OS=Homo sapiens GN=GSTA1 PE=1 SV=3	0	10.9714	15.7658	5	10	5	1	222	25.615	8.88	Phospho [S202(100)]	1.062	0.547	0.222	0.734	0.347	0.916	0.942	1.304	0.689	4.105	1.261	1.301	1.475	0.523	1.293	0.635	1.331	0.556	93.1	82.5	129.2	80.2	114	113.3	87.6	77.9	185.6	74.5	31.5	98	90.3	142.3	26	307.9
FALSE	High	Master Protein	A0A087WWK8	IQ motif and SEC7 domain-containing protein 1 OS=Homo sapiens GN=IQSEC1 PE=1 SV=1	0	10.8298	3.05206	3	6	3	1	1114	124.399	8.41	Phospho [S166(100); S403(100); S498(100)]	0.949	1.449	0.862	0.612	0.697	1.292	0.965	0.943	1.096	1.866	2.032	1.062	1.177	0.866	1.194	0.928	0.397	0.76	87	88.5	107.8	118.4	97.3	109.4	91.6	142	92.4	84.8	84.4	107.4	91	98	66.3	177.4
FALSE	High	Master Protein	M0R0P8	Unconventional myosin-IXb OS=Homo sapiens GN=MYO9B PE=1 SV=1	0	10.817	1.99351	3	8	3	1	2157	243.248	8.78	Phospho [T1271(100); S1290(100)]	1.082	0.906	0.998	0.765	0.57	0.86	0.927	1.042	0.878	0.901	0.758	0.948	0.938	0.993	0.803	1.166	0.81	0.788	115.5	99	100.1	91.8	101.2	85.8	106.7	90.9	104.5	99.6	100	88	116.9	100.2	71.4	112.7
FALSE	High	Master Protein	P51812	Ribosomal protein S6 kinase alpha-3 OS=Homo sapiens GN=RPS6KA3 PE=1 SV=1	0	10.8059	4.18919	3	17	3	1	740	83.683	6.89	Phospho [S227(100); S415(100)]	1.295	0.663	0.982	0.549	0.791	0.893	0.871	0.962	0.796	1.068	0.787	0.813	1.102	0.854	0.951	0.86	0.827	0.68	130.9	88	111.4	90.2	82.2	96.1	101.1	75.9	110	97.8	112.4	91.1	98.4	114.4	97.1	131.1
FALSE	High	Master Protein	O43399	Tumor protein D54 OS=Homo sapiens GN=TPD52L2 PE=1 SV=2	0	10.7794	14.5631	2	15	2	1	206	22.224	5.36	Phospho [S21(100); S166(100)]	1.147	0.897	0.935	1.625	0.592	2.089	1.024	0.981	1.94	0.534	1.007	0.917	1.576	0.521	1.183	0.565	0.866	0.804	89.9	80.2	123.5	163.7	71.8	92.6	78.3	91.8	100.4	53.3	95.7	198.5	57.9	102.3	64.5	58.2
FALSE	High	Master Protein	A0A0G2JHC2	PPP1R18 OS=Homo sapiens GN=PPP1R18 PE=1 SV=1	0	10.7768	4.40457	3	11	3	1	613	68.001	5.45	Phospho [S125(100); S224(100)]	0.957	1.246	1.095	1.732	0.269	1.525	1.188	1.388	1.244	0.703	0.917	1.21	1.266	0.804	1.37	0.929	1.161	1.112	78.7	97.7	104	125.4	99.4	112.6	82.2	113.2	126.1	73	99.5	113	84.4	90.8	27.3	71.4
FALSE	High	Master Protein	Q6PD62	RNA polymerase-associated protein CTR9 homolog OS=Homo sapiens GN=CTR9 PE=1 SV=1	0	10.7741	5.37084	4	5	4	1	1173	133.42	6.77	Phospho [T925(100); S970(100); S1072(100); S1099(98)]	0.776	1.077	1.075	1.352	0.321	1.401	1.239	1.035	1.052	0.724	1.485	1.185	1.124	0.864	1.57	1.167	1.101	1.307	65.5	104.6	94.9	118.2	100	132.5	84.4	103.7	99.6	83.2	103.5	101.3	112.4	96.3	30.9	69.5
FALSE	High	Master Protein	Q9UI08	Ena/VASP-like protein OS=Homo sapiens GN=EVL PE=1 SV=2	0	10.7695	7.21154	2	10	2	1	416	44.592	8.84	Phospho [S259(100); S331(98.7)]	1.077	0.734	0.969	0.72	1.357	0.839	0.962	1.499	1.426	1.086	0.897	1.077	0.867	1.391	0.935	0.834	0.718	0.653	111.6	99.7	89.8	86.9	111.6	96.8	103.6	65.5	133.6	124	86.4	127.1	74.4	89.1	147.7	118.2
FALSE	High	Master Protein	P02794	Ferritin heavy chain OS=Homo sapiens GN=FTH1 PE=1 SV=2	0	10.6935	17.4863	2	13	2	1	183	21.212	5.55	Phospho [S179(100)]	0.761	1.257	0.683	0.69	0.41	0.861	1.616	1.334	1.113	0.827	1.735	1.275	0.702	0.771	0.928	0.874	0.664	0.798	74.6	158.4	68.8	84.4	125	90.9	98	125.1	132.8	76.8	68	110.8	87	99.5	46.9	94.5
FALSE	High	Master Protein	P16402	Histone H1.3 OS=Homo sapiens GN=HIST1H1D PE=1 SV=2	0	10.6202	14.9321	3	11	3	1	221	22.336	11.02	Phospho [S37(100)]	0.98	1.082	1.044	0.481	0.816	0.894	1.382	1.139	1.13	1.411	1.484	1.309	0.835	1.062	0.885	1.002	0.843	0.274	94.2	132.8	80.2	85.9	125.7	85.1	96.1	101.5	106.9	99.7	98	106	94.1	93.9	90.5	156.6
FALSE	High	Master Protein	P43487	Ran-specific GTPase-activating protein OS=Homo sapiens GN=RANBP1 PE=1 SV=1	0	10.5756	27.8607	3	9	3	1	201	23.296	5.29	Phospho [S60(100)]	1.109	1.036	1.116	0.722	0.774	1.267	0.9	0.881	1.779	1.884	1.691	1.011	1.25	0.86	1.039	0.614	0.811	0.623	102.4	83.1	115.5	117.1	93.5	96	92.4	99.5	84.6	82.7	107.2	170.9	59	96.1	72.2	175.7
FALSE	High	Master Protein	Q14739	Lamin-B receptor OS=Homo sapiens GN=LBR PE=1 SV=2	0	10.5007	3.57724	3	21	3	1	615	70.658	9.36	Phospho [S71(97.8)]	1.761	1.721	0.892	0.835	0.426	1.403	1.107	1.203	1.001	0.666	1.171	1.06	1.646	0.54	1.36	0.779	0.866	0.777	132	83	123.4	105.2	79.5	102	75	168.8	118	52.9	87.5	98.2	76.4	98.1	51.9	81.2
FALSE	High	Master Protein	Q9UK76	Jupiter microtubule associated homolog 1 OS=Homo sapiens GN=JPT1 PE=1 SV=3	0	10.3299	9.74026	1	31	1	1	154	16.005	5.6	Phospho [S88(97.3)]	0.974	1.322	1.291	2.064	0.583	1.703	0.636	0.906	1.223	0.803	0.82	0.896	1.212	0.762	1.069	0.727	1.872	0.681	91.1	59.4	113.3	159.1	83.7	99.9	93.5	128	87.7	73.8	125	118.4	70.4	96.8	52.1	71.9
FALSE	High	Master Protein	Q9NSK0	Kinesin light chain 4 OS=Homo sapiens GN=KLC4 PE=1 SV=3	0	10.236	7.10824	3	16	3	1	619	68.598	6.18	Phospho [S590(100); S611(98.9)]	1.113	1.187	1.002	0.874	0.787	1.339	0.997	0.982	1.666	0.976	1.101	1.068	1.22	0.791	1.034	0.77	0.91	0.868	100.3	89.8	109.9	120.6	96.2	93.2	90.1	112.3	92.9	74.9	94.8	157.6	72.8	94.6	84.5	104.8
FALSE	High	Master Protein	Q08170	Serine/arginine-rich splicing factor 4 OS=Homo sapiens GN=SRSF4 PE=1 SV=2	0	10.1946	2.63158	1	6	1	1	494	56.645	11.52	Phospho [S431(100)]	0.735	2.005	1.926	1.305	0.832	1.096	0.981	1.311	1.284	0.746	1.059	0.887	0.768	0.893	1.287	0.854	2.22	1.104	76.2	101.7	79.6	113.6	91.9	133.4	103.6	151.3	99	67.4	145.4	96.9	64.4	75.5	70.5	63.2
FALSE	High	Master Protein	Q9NZN4	EH domain-containing protein 2 OS=Homo sapiens GN=EHD2 PE=1 SV=2	0	10.1048	4.23573	1	13	1	1	543	61.123	6.46	Phospho [S438(100)]	0.864	0.563	0.575	0.405	2.476	0.487	0.821	0.715	0.472	2.682	0.555	0.695	0.705	1.751	0.624	1.653	0.555	0.448	116.4	110.6	95	65.6	93.6	84.1	134.7	58.5	74.4	182.2	59.8	49.1	171.9	104	213.5	231.2
FALSE	High	Master Protein	Q15637	Splicing factor 1 OS=Homo sapiens GN=SF1 PE=1 SV=4	0	10.0788	6.10329	2	12	2	1	639	68.286	8.98	Phospho [S80(100); S82(100)]	0.96	0.942	0.907	1.038	1.875	0.808	0.875	0.719	0.704	1.476	0.883	0.863	0.99	0.8	0.952	0.651	1.181	1.272	104.2	95	107.4	87.7	93.7	103.4	108.6	115.2	88	97.8	111	86.1	79.6	122.3	150.4	118.4
FALSE	High	Master Protein	E7EQL5	Cytoplasmic dynein 1 intermediate chain 2 (Fragment) OS=Homo sapiens GN=DYNC1I2 PE=1 SV=1	0	10.0169	22.9508	3	8	3	1	305	34.892	5.03	Phospho [S83(98.6)]	0.916	1.015	0.952	0.841	1.352	0.932	1.029	0.834	1.011	1.089	0.88	0.904	0.901	1.092	0.964	1.023	0.838	0.924	96.5	108.4	94.9	98.1	95.2	101.5	105.3	102.6	84.2	110.3	96.2	102.1	103.4	101.1	136.7	110.1
FALSE	High	Master Protein	H3BS72	Very-long-chain (3R)-3-hydroxyacyl-CoA dehydratase OS=Homo sapiens GN=HACD3 PE=1 SV=1	0	9.99997	3	1	14	1	1	400	47.088	8.85	Phospho [S152(100)]	1.537	0.298	1.128	0.514	0.794	0.888	1.132	0.725	0.33	3.053	0.399	0.787	0.942	1.06	1.019	1.574	0.48	0.998	147.3	108.5	90.3	85.1	75.4	97.6	95.8	34.1	83	121.3	129.2	37.8	180.2	114.5	76.8	295.3
FALSE	High	Master Protein	C9JME2	FERM, RhoGEF and pleckstrin domain-containing protein 1 OS=Homo sapiens GN=FARP1 PE=1 SV=2	0	9.93127	5.48327	4	5	4	1	1076	122.019	8.48	Phospho [S427(100); S433(100); S510(100); S920(99.9)]	0.824	0.883	0.861	0.672	1.637	1.492	1.104	1.044	0.927	1.184	1.675	1.166	1.143	0.79	1.412	0.821	0.773	0.959	70.8	94.9	98.3	128.3	100.3	121.4	86	97.7	115.5	87.4	95.3	102.6	90.9	110.6	145	104.9
FALSE	High	Master Protein	P10644	cAMP-dependent protein kinase type I-alpha regulatory subunit OS=Homo sapiens GN=PRKAR1A PE=1 SV=1	0	9.92924	4.72441	2	15	2	1	381	42.955	5.35	Phospho [S83(100)]	1.018	0.702	0.825	0.729	1.683	0.898	1.024	0.883	1.015	1.566	0.933	1.038	1.009	1.009	0.919	0.958	0.813	0.691	103.2	103.8	102.2	91	105.2	93.1	101.4	76.9	96.7	110.5	90.4	111.1	104.9	109.5	158.9	147.9
FALSE	High	Master Protein	Q96PK6	RNA-binding protein 14 OS=Homo sapiens GN=RBM14 PE=1 SV=2	0	9.89132	7.92227	3	23	3	1	669	69.449	9.67	Phospho [T206(100); S582(100)]	1.012	0.675	1.206	1.431	0.553	1.115	0.947	0.764	0.701	0.888	0.956	0.93	1.287	0.71	1.148	0.752	1.206	1.643	95.3	89.1	121.1	104.9	87.5	108	94.1	81.3	92.1	85.6	145.4	84.4	90.6	120.5	50.4	81
FALSE	High	Master Protein	O43290	U4/U6.U5 tri-snRNP-associated protein 1 OS=Homo sapiens GN=SART1 PE=1 SV=1	0	9.86173	7.125	3	10	3	1	800	90.2	6.13	Phospho [S448(100)]	1.137	1.212	1.192	0.708	1.179	0.838	1.022	0.856	0.872	0.98	0.856	0.922	1.097	1.149	1.009	0.844	0.916	0.763	113.3	101.8	109.3	83.5	91.9	100.5	99.7	119	84.1	112.9	117.1	85.7	82.9	98.2	128.9	107.2
FALSE	High	Master Protein	Q6JBY9	CapZ-interacting protein OS=Homo sapiens GN=RCSD1 PE=1 SV=1	0	9.8107	6.97115	2	16	2	1	416	44.477	5.4	Phospho [S179(100); S216(100)]	0.968	0.69	0.876	0.619	0.977	0.818	0.995	1.312	1.123	1.022	0.829	1.001	0.836	0.952	0.922	0.872	0.829	0.746	103.6	106.5	89.4	87.5	107.2	98.7	107	70.8	134.6	97.6	89.9	115.1	89.5	102.5	113.5	118.8
FALSE	High	Master Protein	Q68EM7	Rho GTPase-activating protein 17 OS=Homo sapiens GN=ARHGAP17 PE=1 SV=1	0	9.75933	4.31328	2	26	2	1	881	95.377	7.62	Phospho [S161(97.4); S676(98.1)]	1.061	0.803	0.956	0.896	1.273	1.439	0.988	1.115	1.186	1.128	0.887	1.086	0.959	1.035	1.213	0.843	1.081	0.906	95.9	89.3	86.7	130	98.2	109.6	90.4	81	112.5	104.4	96.5	119.7	85	100.9	124.2	110.1
FALSE	High	Master Protein	Q99549	M-phase phosphoprotein 8 OS=Homo sapiens GN=MPHOSPH8 PE=1 SV=2	0	9.75439	4.53488	2	14	2	1	860	97.123	6.06	Phospho [S51(100)]	0.939	1.063	1.132	0.927	1.219	0.762	0.789	0.764	0.85	1.443	0.867	0.721	1.08	1.03	0.969	0.843	1.402	1.139	105	88.3	120.8	85.2	80.6	108.4	111.8	111.3	80	107.9	118.6	89.1	88.3	104.8	106.7	126.3
FALSE	High	Master Protein	Q96TA1	Niban-like protein 1 OS=Homo sapiens GN=FAM129B PE=1 SV=3	0	9.75051	7.23861	2	14	2	1	746	84.085	6.19	Phospho [S646(100); S696(100)]	0.953	0.577	0.827	0.482	1.608	0.621	0.906	0.978	1.2	2.11	0.837	1.159	0.609	1.805	0.772	1.432	1.304	0.617	110.8	105.3	70.8	72.2	134.8	89.8	116.3	51.6	87.5	161.6	74	107.4	128.2	89.5	141.5	185.6
FALSE	High	Master Protein	Q9UPT8	Zinc finger CCCH domain-containing protein 4 OS=Homo sapiens GN=ZC3H4 PE=1 SV=3	0	9.7482	1.07444	1	7	1	1	1303	140.169	6.27	Phospho [S1275(100)]	0.859	0.938	0.869	0.901	0.436	0.932	1.013	1.163	1.003	0.824	0.825	0.836	0.932	1.005	1.029	1.077	0.907	0.901	91.1	107.4	98.8	98.8	88.6	109.2	106.1	93.1	115.3	99.7	86.2	99.5	106.9	99.2	52.7	99.6
FALSE	High	Master Protein	Q99590	Protein SCAF11 OS=Homo sapiens GN=SCAF11 PE=1 SV=2	0	9.7318	3.8961	4	12	4	1	1463	164.551	8.41	Phospho [S608(100); S796(99.9); S902(99.1)]	0.986	0.99	0.909	1.007	1.03	1.138	0.985	1.001	0.867	0.622	1.279	1.104	1.215	0.974	1.039	0.907	1.597	1.092	92.4	92.3	113.9	106.7	103.5	97.4	93.7	104.2	105.4	102.6	95.7	91.3	95.5	105.3	94.5	57.1
FALSE	High	Master Protein	Q9NQC3	Reticulon-4 OS=Homo sapiens GN=RTN4 PE=1 SV=2	0	9.7236	4.27852	2	9	1	1	1192	129.851	4.5	Phospho [S107(100)]	1.403	0.539	1.582	0.457	1.775	0.682	0.949	0.348	0.766	1.289	0.485	0.931	0.755	1.536	0.808	1.119	1.322	0.158	150.5	101.8	80.9	73.2	99.8	86.6	107.2	54.8	35.3	156	160.8	77.8	113.7	101.6	191.5	139.1
FALSE	High	Master Protein	Q92615	La-related protein 4B OS=Homo sapiens GN=LARP4B PE=1 SV=3	0	9.68087	5.14905	3	12	3	1	738	80.503	6.92	Phospho [S585(99.9); S601(98.6); S736(100)]	0.836	1.382	0.919	2.578	0.466	1.109	0.952	1.127	0.86	0.751	1.093	0.858	0.875	0.682	1.084	0.845	1.145	1.648	87.2	99.3	91.3	115.6	89.4	113	104.2	142	115.8	70	94.4	88.4	86.8	102.7	37.6	60.6
FALSE	High	Master Protein	Q96JM3	Chromosome alignment-maintaining phosphoprotein 1 OS=Homo sapiens GN=CHAMP1 PE=1 SV=2	0	9.62091	3.94089	3	11	3	1	812	89.043	8.44	Phospho [S476(100); S542(100)]	0.791	1.059	1.586	0.992	0.473	1.277	0.83	1.24	1.047	0.796	1.025	0.888	0.873	1.816	0.947	0.969	1.157	1.208	83.8	88	92.5	135.3	94.1	100.3	106	85.1	99.6	145.8	127.4	84.1	77.8	80.3	49.8	83.8
FALSE	High	Master Protein	Q63ZY3	KN motif and ankyrin repeat domain-containing protein 2 OS=Homo sapiens GN=KANK2 PE=1 SV=1	0	9.59654	6.22797	3	22	3	1	851	91.118	5.63	Phospho [S323(100); S375(100)]	0.943	0.673	0.761	0.632	1.004	0.701	0.979	0.833	0.968	0.936	0.819	0.869	0.935	0.947	0.742	0.857	0.786	0.841	107	111.1	106.1	79.5	98.6	84.1	113.5	78.1	96.6	109.7	88.2	112.2	99.4	115.9	116.8	108.9
FALSE	High	Master Protein	Q5VT52	Regulation of nuclear pre-mRNA domain-containing protein 2 OS=Homo sapiens GN=RPRD2 PE=1 SV=1	0	9.58428	3.35387	3	10	3	1	1461	155.924	7.42	Phospho [S374(100); S593(100)]	0.945	0.905	1.234	0.874	1.47	0.837	0.75	0.62	0.858	1.076	0.717	0.891	0.896	1.391	0.924	0.89	1.273	0.946	105.9	84.1	100.5	93.8	100	103.6	112.1	91.9	62.9	141.2	125.2	87	90.3	101.5	139.9	102.4
FALSE	High	Master Protein	Q13131	5'-AMP-activated protein kinase catalytic subunit alpha-1 OS=Homo sapiens GN=PRKAA1 PE=1 SV=4	0	9.58324	6.26118	3	9	3	1	559	63.969	8.12	Phospho [S496(98.1); S508(99.1)]	0.786	1.085	0.849	0.664	0.431	1.075	1.087	1.41	1.385	1.15	1.328	1.146	0.977	0.714	1.144	0.884	0.694	0.638	76.2	105.5	94.8	104.3	111.2	111	97	103.6	134.7	68.2	81.2	132.4	84.4	95.5	51.1	136.4
FALSE	High	Master Protein	Q969E4	Transcription elongation factor A protein-like 3 OS=Homo sapiens GN=TCEAL3 PE=1 SV=1	0	9.54535	18	2	6	2	1	200	22.489	4.92	Phospho [S121(98.1)]	0.967	0.846	0.894	0.829	0.765	0.997	1.054	0.794	0.757	0.844	0.722	0.931	0.938	0.907	0.846	1.044	0.786	0.788	100.5	109.6	97.5	103.7	96.8	88	104	94.8	89.1	101.7	100.3	84.9	117.1	112.2	93.3	103
FALSE	High	Master Protein	P16949	Stathmin OS=Homo sapiens GN=STMN1 PE=1 SV=3	0	9.53089	17.4497	3	8	3	1	149	17.292	5.97	Phospho [S25(100); S38(100)]	0.851	0.689	1.104	0.935	0.937	1.074	0.769	0.61	0.935	1.429	0.839	0.943	0.928	1.144	0.694	1.035	1.386	0.734	95.1	86	103.8	120.1	105.5	77.6	111.8	74	65.6	122.9	118.5	100.4	111.2	107.4	90.3	137.8
FALSE	High	Master Protein	Q9Y2X3	Nucleolar protein 58 OS=Homo sapiens GN=NOP58 PE=1 SV=1	0	9.49436	4.34783	2	7	2	1	529	59.541	8.92	Phospho [S502(99.9)]	0.889	0.94	1.025	0.782	2.037	0.662	0.765	1.041	0.8	1.56	0.801	0.679	0.742	0.99	0.796	0.947	0.933	0.906	112.5	96.7	93.9	83.8	86	100.7	126.5	97.6	108.1	102.8	106.4	83	98.4	103.8	177.8	136.2
FALSE	High	Master Protein	Q8IU81	Interferon regulatory factor 2-binding protein 1 OS=Homo sapiens GN=IRF2BP1 PE=1 SV=1	0	9.44458	5.47945	2	6	2	1	584	61.649	8.18	Phospho [S384(100); S453(100)]	0.831	1.166	0.914	1.138	0.669	1.016	0.852	1.067	0.811	0.957	0.988	0.765	0.673	0.922	0.96	1.042	0.977	1.158	95.4	97.9	77.2	116.6	87.8	110.3	114.8	117.9	107.9	93.2	92.4	82	105.4	101.1	68	97.3
FALSE	High	Master Protein	O43166	Signal-induced proliferation-associated 1-like protein 1 OS=Homo sapiens GN=SIPA1L1 PE=1 SV=4	0	9.38681	1.38581	2	11	2	1	1804	199.904	8.19	Phospho [S1549(100)]	0.88	1.051	0.898	0.813	1.267	0.687	0.959	0.997	1.06	1.267	1.164	0.861	0.867	0.934	0.714	0.924	1.227	0.384	103.3	112.4	101.7	80.5	101	83.8	117.3	107.2	101.7	95.2	91.6	108.1	94.2	102	124.6	124.5
FALSE	High	Master Protein	Q7L8J4	SH3 domain-binding protein 5-like OS=Homo sapiens GN=SH3BP5L PE=1 SV=1	0	9.38488	10.1781	4	7	4	1	393	43.473	5.77	Phospho [S343(100); S350(100); S362(100); S378(100)]	0.829	0.806	0.837	2.053	0.302	1.384	0.835	0.94	0.871	0.63	1.121	0.95	1.02	0.871	1.113	0.76	1.485	1.873	81.3	81.9	100.2	135.8	93.3	109.3	98.2	92.7	108.2	100.2	96.2	100.2	87.4	115	24.9	52.1
FALSE	High	Master Protein	O60832	H/ACA ribonucleoprotein complex subunit 4 OS=Homo sapiens GN=DKC1 PE=1 SV=3	0	9.37557	4.86381	2	14	2	1	514	57.638	9.42	Phospho [S494(100); S513(100)]	1.178	0.64	1.312	0.635	0.706	0.919	0.881	0.899	0.805	1.334	0.711	0.978	1.04	1.029	1.121	1.294	0.947	1.271	115.8	86.7	102.3	90.4	96.2	110.2	98.4	64.2	90.2	103.2	131.6	80.8	129.8	100.3	74.8	141.4
FALSE	High	Master Protein	Q96ST2	Protein IWS1 homolog OS=Homo sapiens GN=IWS1 PE=1 SV=2	0	9.36777	6.95971	4	15	4	1	819	91.899	4.69	Phospho [S300(99); S400(98.6); S438(100); S440(100); S520(100); S520(100); S520(100); S520(100); S520(100)]	1.044	1.004	1.111	0.94	0.868	1.086	1.152	0.933	0.841	0.901	0.759	0.905	1.013	0.79	0.965	0.887	0.784	0.796	102	112.5	99	106.1	88.4	94.3	97.7	107	99.5	84.2	118.5	89.7	94.5	106.6	100.5	104.3
FALSE	High	Master Protein	Q7L2J0	7SK snRNA methylphosphate capping enzyme OS=Homo sapiens GN=MEPCE PE=1 SV=1	0	9.32667	4.78955	2	5	2	1	689	74.31	9.57	Phospho [S69(100); S152(100)]	0.883	0.873	0.784	0.643	0.506	1.16	0.963	0.908	0.893	0.628	0.796	0.935	0.926	0.61	1.055	0.98	0.877	0.94	89.2	97.4	93.7	117.3	94.6	106.7	101.1	101.1	105.1	70.6	90.7	103.4	113.4	115.7	65.8	81.6
FALSE	High	Master Protein	Q16643	Drebrin OS=Homo sapiens GN=DBN1 PE=1 SV=4	0	9.24188	5.39291	3	27	3	1	649	71.385	4.45	Phospho [S337(99)]	0.956	1.144	1.437	1.502	0.822	0.709	0.846	0.839	0.78	0.831	0.846	0.793	0.904	1.061	0.888	1.012	0.872	1.453	109.8	97.1	103.8	81.4	91	102	114.8	110.1	80.8	102.1	138.3	75.1	97.4	96.3	78.6	79.4
FALSE	High	Master Protein	A0A0A0MT22	Protein tyrosine phosphatase, receptor type, C, isoform CRA_d OS=Homo sapiens GN=PTPRC PE=1 SV=1	0	9.23354	0.995406	2	11	2	1	1306	147.394	6.15	Phospho [S975(100)]	1.141	0.526	1.096	0.587	0.854	0.719	1.104	0.992	0.55	1.346	0.54	0.789	0.786	1.655	0.802	1.606	0.931	0.62	126	121.9	86.8	79.4	87.1	88.5	110.4	49.6	93.5	156.1	103.3	51.8	151.4	94.3	101.7	160.3
FALSE	High	Master Protein	Q15773	Myeloid leukemia factor 2 OS=Homo sapiens GN=MLF2 PE=1 SV=1	0	9.22284	8.87097	2	9	2	1	248	28.129	6.9	Phospho [S216(100); S238(100)]	0.941	0.926	0.707	0.632	0.454	1.493	0.993	0.63	0.52	0.852	1.477	0.907	0.792	0.55	1.561	0.708	0.671	0.773	85.7	90.5	72.1	135.9	82.6	142.2	91.1	128.6	87.5	76.3	98.1	72.3	98.3	138.9	54.2	101.8
FALSE	High	Master Protein	Q9H8G2	Caspase activity and apoptosis inhibitor 1 OS=Homo sapiens GN=CAAP1 PE=1 SV=2	0	9.17406	9.14127	2	14	2	1	361	38.344	4.72	Phospho [S312(98.4)]	1.065	0.904	1.501	0.832	1.399	0.824	1.011	0.792	0.93	0.951	0.781	0.816	1.137	1.007	0.895	0.819	1.045	0.997	110.5	104.9	118	85.5	84.6	92.8	103.7	91	79.7	101.4	151.1	93.7	82.5	100.7	139.8	95
FALSE	High	Master Protein	Q9UKJ3	G patch domain-containing protein 8 OS=Homo sapiens GN=GPATCH8 PE=1 SV=2	0	9.1626	1.99734	2	18	2	1	1502	164.098	8.66	Phospho [S1107(98.1)]	1.121	1.061	0.976	1.138	0.801	1.175	1.088	0.847	0.934	0.89	0.889	1.079	1.205	0.933	1.088	0.925	1.203	1.141	101.2	98.2	108.8	106	97.4	98.2	90.2	111.3	88.8	97.8	102.3	97.9	97	104.9	79.4	88.2
FALSE	High	Master Protein	P05455	Lupus La protein OS=Homo sapiens GN=SSB PE=1 SV=2	0	9.10512	10.2941	3	4	3	1	408	46.808	7.12	Phospho [S366(100)]	1.158	0.792	1.069	0.934	0.677	0.904	0.905	0.792	0.881	0.901	0.958	0.794	1.099	0.872	0.96	0.856	1.114	1.023	118.8	92.9	112.8	92.8	81.5	98.5	102.6	88.5	88.6	97.4	119.5	98.5	95.7	111.8	71.7	95.5
FALSE	High	Master Protein	A0A087X165	SRC kinase-signaling inhibitor 1 OS=Homo sapiens GN=SRCIN1 PE=1 SV=1	0	9.07259	2.1364	2	8	2	1	1217	130.383	9.26	Phospho [S551(99.9); S1021(100)]	0.943	0.997	0.644	0.555	0.188	1.465	1.237	0.863	1.032	0.473	0.776	1.691	0.927	0.648	1.047	0.864	0.523	0.785	79.4	104.2	78.1	123.4	142.4	88.2	84.2	115.4	99.9	75	74.6	119.4	100	115.7	30.7	77.1
FALSE	High	Master Protein	Q8WWQ0	PH-interacting protein OS=Homo sapiens GN=PHIP PE=1 SV=2	0	9.0655	1.31796	2	15	2	1	1821	206.56	8.85	Phospho [S1315(100); S1783(100)]	1.038	0.702	1.223	0.766	1.201	0.897	1.035	0.873	0.74	1.013	0.757	0.893	0.836	0.957	1.008	0.937	0.963	0.903	108.3	108	87.3	93.6	93.2	105.2	104.4	76.4	95	104.2	133.1	80.5	101.9	108.8	127.3	107.4
FALSE	High	Master Protein	P52597	Heterogeneous nuclear ribonucleoprotein F OS=Homo sapiens GN=HNRNPF PE=1 SV=3	0	8.98423	10.3614	3	7	1	1	415	45.643	5.58	Phospho [S310(100)]	1.126	0.958	0.823	0.958	1.214	0.902	1.043	1	0.917	1.134	0.98	1.013	0.958	1.326	0.977	0.902	0.945	0.791	112.3	104	95.5	90	101	97.4	99.7	96.8	101	134.1	83.2	92.6	91.2	101.1	121.1	113
FALSE	High	Master Protein	P21291	Cysteine and glycine-rich protein 1 OS=Homo sapiens GN=CSRP1 PE=1 SV=3	0	8.96245	16.5803	2	10	2	1	193	20.554	8.57	Phospho [S192(100)]	1.027	0.655	0.646	0.644	0.989	0.779	0.99	1.006	0.803	1.173	1.095	0.794	0.919	1.44	0.889	1.365	0.886	0.89	112.3	108.4	100.6	85.2	86.9	97.3	109.4	66.3	101.9	145.8	65.4	81.3	138.2	101.2	103.7	122.9
FALSE	High	Master Protein	Q9H3Z4	DnaJ homolog subfamily C member 5 OS=Homo sapiens GN=DNAJC5 PE=1 SV=1	0	8.9398	8.58586	1	46	1	1	198	22.134	5.07	Phospho [S10(98.8)]	1.911	0.682	1.49	0.626	1.366	0.713	1.143	0.778	0.502	1.778	0.464	0.904	0.939	1.726	1.028	1.421	1.363	0.611	175.1	104.8	86.1	65.4	82.9	94.2	91.7	62.8	71.7	159	137.2	46.3	130.9	92.1	132.6	172.7
FALSE	High	Master Protein	Q68CZ2	Tensin-3 OS=Homo sapiens GN=TNS3 PE=1 SV=2	0	8.91315	4.70588	4	8	4	1	1445	155.169	6.81	Phospho [S332(99.8); S776(100); S1105(100); S1154(100)]	1.291	1.221	1.099	0.705	0.94	0.858	0.942	1.433	0.894	1.14	0.676	0.852	0.989	0.911	0.822	1.059	0.652	0.744	133.8	97.6	102.5	88.9	88.3	85.2	103.7	112.2	131.7	83.8	101	82.1	97.3	91.9	112.3	136.2
FALSE	High	Master Protein	Q7L4I2	Arginine/serine-rich coiled-coil protein 2 OS=Homo sapiens GN=RSRC2 PE=1 SV=1	0	8.85324	4.60829	2	12	2	1	434	50.529	11.33	Phospho [S32(100); S104(100)]	0.914	1.166	1.145	1.155	0.593	1.112	1.284	1.159	1.136	0.839	1.045	1.214	1.004	0.818	1.108	0.905	1.053	1.013	83.8	117.7	92	102	111.3	101.6	91.7	111.4	110.7	78.1	109.4	108.5	86.4	95.5	61.9	87.7
FALSE	High	Master Protein	Q15052	Rho guanine nucleotide exchange factor 6 OS=Homo sapiens GN=ARHGEF6 PE=1 SV=2	0	8.83932	2.96392	2	12	2	1	776	87.443	6.05	Phospho [S488(100); S684(100)]	1.07	0.776	1.007	0.679	0.27	1.303	1.078	1.184	0.945	1.201	0.881	1.214	1	1.161	1.441	1.137	0.756	0.512	92.4	93.1	86.3	112.5	104.8	124.4	86.4	75.4	115	112.7	97.7	91.7	110.4	97.1	35.7	158.6
FALSE	High	Master Protein	Q8ND30	Liprin-beta-2 OS=Homo sapiens GN=PPFIBP2 PE=1 SV=3	0	8.79433	4.56621	3	8	3	1	876	98.482	6.27	Phospho [S363(100); S387(100); S512(100)]	1.127	1.266	0.846	0.603	0.516	1.037	0.963	1.321	1.57	1.13	0.937	1.034	0.848	0.811	0.996	0.792	0.96	0.598	112.7	96.2	84.7	103.6	103.3	99.6	99.9	116.6	121.5	74.6	77.8	144.5	72.9	92	62.8	137.8
FALSE	High	Master Protein	Q15388	Mitochondrial import receptor subunit TOM20 homolog OS=Homo sapiens GN=TOMM20 PE=1 SV=1	0	8.71441	8.96552	1	12	1	1	145	16.288	8.6	Phospho [S135(100)]	0.762	0.851	1.037	0.62	1.534	0.659	0.656	0.622	0.624	1.039	0.65	0.557	0.855	0.948	0.779	0.681	0.816	0.769	101.3	87.2	113.6	87.5	74	103.6	132.9	103.4	75.5	115.1	126	75.8	82.7	121.5	167.1	113.2
FALSE	High	Master Protein	E7ERS3	Zinc finger CCCH domain-containing protein 18 OS=Homo sapiens GN=ZC3H18 PE=1 SV=1	0	8.66875	6.34596	4	7	4	1	977	108.875	8.44	Phospho [S46(100); S866(98.6); S917(100)]	1.039	1.087	1.064	1.459	0.41	1.797	0.815	1.051	1.108	0.638	0.984	1.023	1.434	0.788	1.586	0.918	1.261	1.435	83.7	65.6	115.5	144.7	82.4	127.7	80.5	108.4	104.9	78.6	106.2	110.6	91.6	99.8	40	62.2
FALSE	High	Master Protein	Q7Z460	CLIP-associating protein 1 OS=Homo sapiens GN=CLASP1 PE=1 SV=1	0	8.65933	2.0156	2	6	2	1	1538	169.346	9.03	Phospho [S600(100); S646(96.1)]	0.948	1.031	0.952	0.906	0.628	0.948	1.027	0.988	0.988	0.812	0.874	0.937	1.014	0.789	1.008	0.839	1.139	0.851	96.4	104.5	103.1	96.4	95.3	102.5	101.7	109.6	104.9	83.8	101.2	105	89.2	106.3	70.7	91.5
FALSE	High	Master Protein	Q4G0J3	La-related protein 7 OS=Homo sapiens GN=LARP7 PE=1 SV=1	0	8.5924	4.98282	2	22	2	1	582	66.857	9.55	Phospho [S261(98.4); S298(99.3)]	1.077	0.936	0.911	0.84	0.689	0.986	1.045	0.987	0.804	0.893	0.843	0.985	1.045	0.807	0.985	0.905	0.976	0.968	105.8	102.7	102.7	96.9	96.8	96.8	98.3	103.1	108.7	89	100.4	88.7	99.8	110.2	77.7	100.7
FALSE	High	Master Protein	Q9BU76	Multiple myeloma tumor-associated protein 2 OS=Homo sapiens GN=MMTAG2 PE=1 SV=1	0	8.53115	10.2662	3	9	3	1	263	29.394	10.02	Phospho [S246(100); S251(98.3)]	0.867	1.035	1.195	1.742	0.318	0.996	1.233	1.132	0.774	0.582	0.868	1.185	0.939	1.195	1.124	0.894	1.77	1.914	82.6	117.5	89.5	94.9	113	107.1	95.3	100.3	109.7	115.8	115.8	75	86.6	96.9	27.2	49.7
FALSE	High	Master Protein	O15127	Secretory carrier-associated membrane protein 2 OS=Homo sapiens GN=SCAMP2 PE=1 SV=2	0	8.51329	3.95137	1	14	1	1	329	36.625	6.1	Phospho [S319(99.5)]	0.992	0.794	1.087	0.833	1.496	0.886	0.833	0.96	0.715	1.096	0.762	0.777	0.877	1.005	0.866	1.099	0.915	0.832	111.4	93.6	98.5	99.6	87.3	97.3	112.3	83.5	100.9	105.6	114.3	75.2	115.5	105.1	151	110.6
FALSE	High	Master Protein	Q9Y6I3	Epsin-1 OS=Homo sapiens GN=EPN1 PE=1 SV=2	0	8.4848	3.99306	1	23	1	1	576	60.256	4.83	Phospho [S420(98.6)]	1.023	0.919	1.03	0.647	3.144	0.671	0.726	0.342	0.734	1.423	0.42	0.716	0.991	1.622	0.752	0.963	0.505	0.256	121.8	86.4	118	79.9	85.2	89.5	119.1	97.3	36.2	171.8	109.1	77.7	102	105.9	297.6	134.7
FALSE	High	Master Protein	Q8NDI1	EH domain-binding protein 1 OS=Homo sapiens GN=EHBP1 PE=1 SV=3	0	8.47419	3.00569	4	8	4	1	1231	139.931	5.35	Phospho [S436(99.9); S1035(100); S1058(100)]	0.742	0.993	0.939	1.701	0.385	0.995	1.323	1.085	1.716	1.055	1.107	1.096	0.906	0.949	0.945	0.989	0.82	0.896	74.1	132.2	90.5	99.4	109.5	94.4	99.9	90.6	99	86.6	85.7	156.5	90.3	91.2	38.7	106.1
FALSE	High	Master Protein	O75396	Vesicle-trafficking protein SEC22b OS=Homo sapiens GN=SEC22B PE=1 SV=4	0	8.44139	11.1628	2	7	2	1	215	24.578	6.92	Phospho [S137(100); S168(100)]	0.863	0.538	1.226	0.46	1.017	1.353	0.836	0.735	0.642	1.401	0.958	0.814	0.653	1.295	1.101	1.234	0.867	0.314	91.3	88.5	69.1	143	86	116.4	105.7	56.4	77.1	135.9	128.7	67.4	129.5	104.9	118.3	163
FALSE	High	Master Protein	P98082	Disabled homolog 2 OS=Homo sapiens GN=DAB2 PE=1 SV=3	0	8.43052	7.53247	3	6	3	1	770	82.397	5.53	Phospho [S227(100); S401(100)]	1.021	0.517	0.708	1.088	0.898	1.087	0.704	0.667	0.576	0.969	0.652	0.806	0.902	0.801	1.084	0.79	1.313	1.045	108.2	74.6	95.6	115.2	85.5	114.9	106	71.6	92.3	110.8	98	79.7	109.3	138.4	90.3	97.4
FALSE	High	Master Protein	Q7Z5K2	Wings apart-like protein homolog OS=Homo sapiens GN=WAPL PE=1 SV=1	0	8.3508	3.02521	2	9	2	1	1190	132.863	5.44	Phospho [S77(98.2); S221(100)]	1.222	1.346	1.105	0.706	1.075	1.083	1.041	1.216	1.175	0.968	0.884	1.006	1.128	0.992	1.133	0.987	1.095	0.734	112.3	95.7	103.7	99.6	92.5	104.2	91.9	120.5	108.8	88.8	98.9	105.2	88.3	89.5	116.5	104.9
FALSE	High	Master Protein	Q9H019	Mitochondrial fission regulator 1-like OS=Homo sapiens GN=MTFR1L PE=1 SV=2	0	8.34633	11.9863	3	13	3	1	292	31.937	6.1	Phospho [S41(100); S103(100); S238(99.2)]	0.755	0.835	0.958	2.53	0.548	0.936	1.041	0.995	1.151	0.985	1.047	1.119	0.829	0.867	0.85	1.056	0.624	1.415	80.9	111.6	88.8	100.3	120	91.1	107.2	85.2	101.5	88.4	97.8	117.4	107.7	102	47.1	84.6
FALSE	High	Master Protein	Q9H0D6	5'-3' exoribonuclease 2 OS=Homo sapiens GN=XRN2 PE=1 SV=1	0	8.3393	2.94737	2	5	2	1	950	108.513	7.47	Phospho [S448(100); S499(100); S501(100)]	1.16	0.812	1.317	0.726	1.22	1.064	0.955	0.968	0.93	1.115	0.583	0.838	1.144	0.987	1.003	1.118	0.759	1.276	113.4	93.3	111.8	104	81.9	98	97.7	79.7	95	96.9	129.3	91.3	109.8	98.1	127.9	116.9
FALSE	High	Master Protein	O15173	Membrane-associated progesterone receptor component 2 OS=Homo sapiens GN=PGRMC2 PE=1 SV=1	0	8.32158	15.6951	3	6	2	1	223	23.804	4.88	Phospho [S104(100); T211(100)]	0.968	0.581	0.683	0.818	3.253	0.754	0.824	0.807	0.942	2.233	0.824	0.841	0.834	0.643	0.942	0.709	0.775	0.73	109.9	93.6	94.8	85.6	95.6	107	113.6	75.8	105.3	83.9	89.1	122.9	92.5	130.5	236.4	162.3
FALSE	High	Master Protein	E7EUC7	UTP--glucose-1-phosphate uridylyltransferase OS=Homo sapiens GN=UGP2 PE=1 SV=1	0	8.3005	6.38298	2	7	2	1	517	57.769	8.13	Phospho [S22(100)]	0.908	0.514	0.731	0.531	1.313	1.147	0.902	1.311	1.128	1.513	1.338	1.242	0.652	1.494	1.504	0.999	0.791	0.78	86.4	85.9	62	109.2	118.2	143.1	95.2	50.1	127.9	145.7	71.3	110	97.4	97.5	126.5	145.7
FALSE	High	Master Protein	Q13243	Serine/arginine-rich splicing factor 5 OS=Homo sapiens GN=SRSF5 PE=1 SV=1	0	8.27755	9.92647	2	12	2	1	272	31.245	11.59	Phospho [S153(98.3)]	0.942	0.848	1.056	1.039	0.821	0.948	0.939	0.944	0.918	0.887	0.94	0.894	0.87	0.909	0.899	0.83	0.839	0.98	101.6	101.3	93.8	102.2	96.4	97	107.8	91.2	101.6	97.8	113.7	98.7	89.3	107.6	88.3	95.4
FALSE	High	Master Protein	P49792	E3 SUMO-protein ligase RanBP2 OS=Homo sapiens GN=RANBP2 PE=1 SV=2	0	8.2636	1.51985	3	9	2	1	3224	357.974	6.2	Phospho [S1955(99.1); S2804(97.4)]	1.094	1.071	1.072	1.141	0.784	0.956	1.054	0.894	0.932	0.78	1.056	0.904	1.047	0.823	1.002	0.857	1.191	1.292	108.5	104.5	103.9	94.9	89.7	99.4	99.2	112.8	94.1	86.7	112.9	98.1	90.2	105.3	75.7	75.4
FALSE	High	Master Protein	P23396	40S ribosomal protein S3 OS=Homo sapiens GN=RPS3 PE=1 SV=2	0	8.25602	5.34979	1	10	1	1	243	26.671	9.66	Phospho [T221(99)]	1.445	0.99	1.159	0.73	0.501	1.183	0.708	0.838	0.721	1.282	0.606	0.819	1.888	0.85	1.448	1.058	1.731	0.957	119.2	58.4	155.6	97.6	67.5	119.3	82.4	104.7	88.7	89.9	122.7	76.3	111.9	105.8	51.5	131.9
FALSE	High	Master Protein	Q86V48	Leucine zipper protein 1 OS=Homo sapiens GN=LUZP1 PE=1 SV=2	0	8.19665	3.71747	3	10	3	1	1076	120.202	8.5	Phospho [S57(100); S394(100)]	1.026	1.183	0.959	1.388	0.3	1.105	0.867	1.359	0.902	0.725	0.792	0.765	1.211	1.18	1.244	1.183	1.356	1.227	99.5	84	117.4	107.2	74.2	120.7	97	106.6	122.5	106.4	86.5	81.3	106.6	90.1	30.9	74.7
FALSE	High	Master Protein	Q9UJU6	Drebrin-like protein OS=Homo sapiens GN=DBNL PE=1 SV=1	0	8.19442	8.60465	3	9	3	1	430	48.178	5.05	Phospho [S272(97.2); T291(100)]	1.04	1.101	0.875	0.93	0.734	0.9	0.82	1.09	1.247	1.128	1.053	0.744	1.014	0.993	0.879	1.005	0.896	0.705	113.8	89.7	111	98.5	81.5	96.2	109.4	105.4	104.4	95.1	83.8	119.4	96.2	95.8	79.8	122.5
FALSE	High	Master Protein	Q9Y4H2	Insulin receptor substrate 2 OS=Homo sapiens GN=IRS2 PE=1 SV=2	0	8.17114	3.13901	3	6	3	1	1338	137.249	8.65	Phospho [S560(100); S915(100)]	0.952	1.386	1.732	0.9	1.273	1.21	0.996	1.475	1.318	1.878	1.637	0.96	1.134	1.092	1.137	0.746	0.639	0.823	90.2	94.3	107.4	114.7	90.9	107.7	94.7	110.9	118	87.4	138.6	105.4	59.7	80	109.3	161.3
FALSE	High	Master Protein	P26368	Splicing factor U2AF 65 kDa subunit OS=Homo sapiens GN=U2AF2 PE=1 SV=4	0	8.10271	2.31579	1	13	1	1	475	53.467	9.09	Phospho [S79(100)]	0.994	1.673	1.033	1.022	0.263	1.321	1.203	1.256	1.114	0.664	0.857	1.189	1.622	0.766	1.201	1.008	1.069	1.119	81.6	98.7	133.1	108.4	97.5	98.6	82.1	149.2	112	68.3	92.1	99.3	89.9	89.2	30.7	77.5
FALSE	High	Master Protein	Q13425	Beta-2-syntrophin OS=Homo sapiens GN=SNTB2 PE=1 SV=1	0	8.05305	4.81481	2	8	2	1	540	57.913	8.82	Phospho [S110(100); S395(96.6)]	1.052	0.898	0.977	0.711	0.325	1.164	1.113	1.052	1.066	0.793	1.261	1.193	1.3	0.907	1.22	1.151	0.889	0.82	91.5	96.9	113.2	101.3	103.8	106.2	87.1	89.1	104.4	90.1	97	105.8	114.2	99.3	39.3	95.7
FALSE	High	Master Protein	Q9Y365	START domain-containing protein 10 OS=Homo sapiens GN=STARD10 PE=1 SV=2	0	8.04049	9.62199	2	9	2	1	291	33.028	7.12	Phospho [S284(100)]	1.028	0.599	0.672	0.573	1.757	0.824	0.878	0.83	0.832	1.832	0.88	0.926	1.065	1.002	0.776	0.881	0.751	0.702	110.8	94.6	114.7	88.8	99.7	83.6	107.7	72.1	99.9	120.6	80.8	100.2	106.1	120.4	164.1	171.1
FALSE	High	Master Protein	O00567	Nucleolar protein 56 OS=Homo sapiens GN=NOP56 PE=1 SV=4	0	8.00767	5.55556	2	27	2	1	594	66.009	9.19	Phospho [S520(98.8)]	1.238	0.754	1.11	0.712	1.303	0.841	0.815	0.73	0.782	1.406	0.754	0.841	1.054	0.912	0.954	0.895	0.977	0.794	128.4	84.6	109.4	87.3	87.3	99	103.8	85.4	82.7	103.3	125.6	88.5	101.3	113.2	131.3	141.7
FALSE	High	Master Protein	O14979	Heterogeneous nuclear ribonucleoprotein D-like OS=Homo sapiens GN=HNRNPDL PE=1 SV=3	0	7.94718	5.47619	2	3	2	1	420	46.409	9.57	Phospho [S241(100)]	1.061	1.217	1.383	1.706	0.223	0.797	0.804	1.171	1.434	0.732	1.197	0.708	0.94	0.582	0.947	0.724	1.431	1.624	118.7	90	105.2	89.2	79.2	105.9	111.9	113.4	109.1	54.3	128.8	133.7	67.5	93.2	19.7	64.8
FALSE	High	Master Protein	Q8TD55	Pleckstrin homology domain-containing family O member 2 OS=Homo sapiens GN=PLEKHO2 PE=1 SV=1	0	7.94166	4.89796	2	18	2	1	490	53.317	5.43	Phospho [T311(100)]	1.179	0.794	0.793	1.122	0.908	0.994	1.065	1.132	0.976	1.201	0.684	0.995	0.892	0.8	0.965	0.698	0.712	0.52	116.4	105.2	88	98.2	98.2	95.3	98.7	89.8	128	90.4	89.7	110.3	78.9	113	103.3	136.7
FALSE	High	Master Protein	Q9H2P0	Activity-dependent neuroprotector homeobox protein OS=Homo sapiens GN=ADNP PE=1 SV=1	0	7.92433	3.17604	2	6	2	1	1102	123.485	7.34	Phospho [S921(98.2)]	1.095	0.92	1.474	1.178	1.199	0.992	1.172	0.898	0.792	1.281	1.252	0.779	1.109	0.974	1.055	0.756	1.599	0.876	106.4	113.9	107.8	96.4	75.7	102.6	97.2	94.5	92.2	100.1	151.4	81.4	77.7	102.7	100.1	106.9
FALSE	High	Master Protein	P49585	Choline-phosphate cytidylyltransferase A OS=Homo sapiens GN=PCYT1A PE=1 SV=2	0	7.83645	8.71935	3	10	3	1	367	41.705	7.25	Phospho [S315(100); S362(100)]	0.897	0.64	0.893	1.213	0.74	1.24	0.921	0.815	0.629	0.826	0.887	0.951	0.972	1.33	1.087	0.797	1.041	1.2	88.8	91.3	96.3	122.8	94.1	107.7	99	73.4	93.5	152.5	102.4	72.1	91.4	114.7	75	83.7
FALSE	High	Master Protein	Q99729	Heterogeneous nuclear ribonucleoprotein A/B OS=Homo sapiens GN=HNRNPAB PE=1 SV=2	0	7.83181	6.0241	2	8	2	1	332	36.202	8.21	Phospho [S81(98.4)]	0.856	1.183	0.841	1.29	0.353	1.174	0.798	0.988	0.889	0.656	1.11	0.827	0.985	0.674	1.263	0.936	1.198	1.422	86.8	80.9	99.9	119.1	83.9	128.1	101.4	127.2	106.2	72.5	90.4	95.6	100.6	107.5	35.2	65.4
FALSE	High	Master Protein	Q00613	Heat shock factor protein 1 OS=Homo sapiens GN=HSF1 PE=1 SV=1	0	7.81477	6.23819	2	14	2	1	529	57.225	5.19	Phospho [S303(100); S307(100); S363(97.4)]	0.948	1	0.993	0.871	0.796	0.659	0.793	0.796	0.81	0.949	0.822	0.729	0.891	0.927	0.837	0.874	0.974	1.04	113.3	94.8	106.4	78.7	87.1	100.1	119.5	109.4	87.1	101.3	108.6	88.6	95.6	109.4	86.4	103
FALSE	High	Master Protein	Q96T23	Remodeling and spacing factor 1 OS=Homo sapiens GN=RSF1 PE=1 SV=2	0	7.71787	1.9431	2	5	2	1	1441	163.72	5.01	Phospho [S604(100); S1345(100)]	1.083	0.846	1.356	1.201	1.182	1.438	0.936	0.819	0.789	1.471	1.248	0.792	1.143	0.964	1.159	0.833	1.259	1.181	100.4	86.8	106	133.3	73.4	107.4	92.7	89.7	86.8	102.1	143.7	83.6	88.2	105.9	96.9	120.6
FALSE	High	Master Protein	Q9NZI8	Insulin-like growth factor 2 mRNA-binding protein 1 OS=Homo sapiens GN=IGF2BP1 PE=1 SV=2	0	7.669	2.07972	1	7	1	1	577	63.441	9.2	Phospho [S181(100)]	1.506	0.658	2.164	0.798	0.248	1.021	0.967	0.843	0.954	0.496	0.522	0.929	2.049	0.745	0.953	1.01	0.714	0.781	125.1	80.4	170.2	84.8	77.2	79.2	83.1	62.5	80	70.7	205.4	90.6	95.9	94.9	38.1	76.2
FALSE	High	Master Protein	Q4L180	Filamin A-interacting protein 1-like OS=Homo sapiens GN=FILIP1L PE=1 SV=2	0	7.66883	4.05286	3	8	3	1	1135	130.301	6.57	Phospho [S791(100); S1049(98.7)]	1.285	0.896	1.089	0.788	0.961	0.91	1.049	0.678	0.839	1.14	0.866	0.755	0.959	1.259	0.862	1.117	0.923	0.984	131.9	107.6	98.4	93.5	77.5	88.5	102.7	91.2	69	128.1	110.8	85.4	113.7	101.8	101	119.8
FALSE	High	Master Protein	Q63HR2	Tensin-2 OS=Homo sapiens GN=TNS2 PE=1 SV=2	0	7.65044	2.90987	3	7	3	1	1409	152.485	8.35	Phospho [S832(97.6); S931(100); S941(100)]	1.071	0.906	0.941	0.845	0.988	0.949	1.129	1.537	1.165	1.083	0.756	0.918	1.088	0.965	0.763	0.906	0.909	0.756	108.3	114.3	110.1	96	92.8	77.2	101.2	85.5	145	91	88.8	109.9	85.5	94.4	109.1	119.7
FALSE	High	Master Protein	Q86SQ0	Pleckstrin homology-like domain family B member 2 OS=Homo sapiens GN=PHLDB2 PE=1 SV=2	0	7.43399	2.55387	2	5	2	1	1253	142.07	7.43	Phospho [S204(97.2); S334(100)]	1.031	1.077	0.919	0.764	0.526	0.895	0.923	1	1.242	0.73	1.089	0.872	1.298	0.888	0.991	0.993	1.082	1.206	102.9	92.2	129.6	89.4	87.1	99	99.8	105.9	98.4	87.3	90.4	122.1	97.6	98.3	57.5	79.8
FALSE	High	Master Protein	Q8NDT2	Putative RNA-binding protein 15B OS=Homo sapiens GN=RBM15B PE=1 SV=3	0	7.25276	2.80899	2	7	2	1	890	97.147	9.85	Phospho [S109(98.7)]	0.714	0.929	1.293	1.124	0.753	0.99	0.861	0.997	1.206	0.69	0.958	0.827	0.908	0.875	1.255	0.98	1.233	1.157	76.3	91.9	97	105.7	88.3	134.1	106.8	89.3	95.9	84.1	124.3	116	94.2	96.2	76.2	69.9
FALSE	High	Master Protein	P16333	Cytoplasmic protein NCK1 OS=Homo sapiens GN=NCK1 PE=1 SV=1	0	7.21223	5.83554	2	4	2	1	377	42.837	6.47	Phospho [S85(94.7)]	0.875	0.975	0.931	0.859	0.952	0.733	0.797	0.96	1.18	1.091	0.94	0.689	0.725	0.901	0.711	0.837	0.893	0.924	110.8	100.9	91.8	92.8	87.2	90	126.6	100.6	99	93	96	121.8	86.4	103.2	100.1	114.7
FALSE	High	Master Protein	O43598	2'-deoxynucleoside 5'-phosphate N-hydrolase 1 OS=Homo sapiens GN=DNPH1 PE=1 SV=1	0	7.06355	15.5172	2	6	2	1	174	19.097	5.05	Phospho [S169(99.9)]	0.789	0.662	0.923	0.831	1.109	1.88	0.908	0.77	0.854	2.466	2.062	1.187	1.149	0.7	1.635	0.68	0.91	0.605	64.6	74.4	94.1	153.9	97.2	133.9	81.9	82.9	96.5	87.6	115.6	107	85.2	125.2	86.4	192.2
FALSE	High	Master Protein	Q15075	Early endosome antigen 1 OS=Homo sapiens GN=EEA1 PE=1 SV=2	0	6.97797	1.84266	2	6	2	1	1411	162.367	5.68	Phospho [S52(98.7)]	0.996	0.906	0.581	0.784	1.463	1.484	0.798	0.327	0.728	1.15	1.112	0.904	0.893	0.579	1.372	0.426	1.022	1.062	93.6	75	84	139.5	85	128.9	94	139.5	50.4	89.1	89.5	112	65.6	153.9	134.9	106
FALSE	High	Master Protein	P08651	Nuclear factor 1 C-type OS=Homo sapiens GN=NFIC PE=1 SV=2	0	6.95227	11.0236	3	12	3	1	508	55.64	8.38	Phospho [S343(99.9)]	0.982	0.898	1.085	1.021	1.283	1.052	0.996	0.938	0.874	1.212	1.083	1.035	0.952	1.004	0.993	0.968	1.008	0.896	98	99.5	95	105.1	103.4	99.1	99.9	92.9	97	103.9	112.3	90.4	100.1	103.4	119.7	113.1
FALSE	High	Master Protein	Q9Y520	Protein PRRC2C OS=Homo sapiens GN=PRRC2C PE=1 SV=4	0	6.75198	1.72652	3	10	3	1	2896	316.718	9.13	Phospho [S2105(100)]	1.038	1.229	1.131	0.812	0.529	1.278	0.957	0.882	1.098	0.813	1.172	1.008	1.187	0.919	1.164	0.965	0.959	0.882	95.2	87.7	108.9	117.2	92.4	106.8	91.7	119.1	85.5	89.1	109.6	106.4	93.5	96.9	60.1	92.3
FALSE	High	Master Protein	Q9Y2H0	Disks large-associated protein 4 OS=Homo sapiens GN=DLGAP4 PE=1 SV=3	0	6.71588	3.62903	2	7	2	1	992	107.945	7.08	Phospho [S973(100)]	1.058	1.275	0.957	1.503	0.38	0.656	0.955	0.854	1.024	0.871	1.004	0.73	0.935	0.939	0.891	0.891	1.086	1.003	119	107.3	105.2	73.8	82.1	100.2	112.4	128.6	86.1	94.7	96.5	103.3	89.9	100.9	38.9	89.1
FALSE	High	Master Protein	Q92685	Dol-P-Man:Man(5)GlcNAc(2)-PP-Dol alpha-1,3-mannosyltransferase OS=Homo sapiens GN=ALG3 PE=1 SV=1	0	6.64955	2.73973	1	11	1	1	438	50.094	9.44	Phospho [S13(99.5)]	1.87	0.856	1.224	0.587	0.353	0.918	1.124	0.797	0.625	1.465	0.526	0.981	1.124	1.063	1.094	1.789	0.616	0.579	161.4	97	97	79.2	84.7	94.4	86.3	81.5	75.9	101.2	116.5	59.5	170.3	95.2	48.2	200
FALSE	High	Master Protein	Q15057	Arf-GAP with coiled-coil, ANK repeat and PH domain-containing protein 2 OS=Homo sapiens GN=ACAP2 PE=1 SV=3	0	6.64949	5.78406	3	11	3	1	778	87.973	6.8	Phospho [S521(98.4)]	1.04	0.781	1.141	0.931	0.963	1.09	0.984	0.991	0.803	1.294	1.054	0.85	0.989	1.057	1.017	0.923	1.295	0.807	104.4	98.9	99.4	109.4	85.4	102.1	100.4	81.7	103.6	110.5	119.3	83.9	96.5	104.5	91.8	123.3
FALSE	High	Master Protein	Q9Y286	Sialic acid-binding Ig-like lectin 7 OS=Homo sapiens GN=SIGLEC7 PE=1 SV=1	0	6.55518	3.85439	1	7	1	1	467	51.11	7.3	Phospho [S406(98.9)]	1.313	1.065	1.044	0.919	1.256	0.772	1.099	1.344	0.97	1.37	0.736	0.743	0.768	1.101	0.692	0.906	1.212	0.849	143.9	120.4	84.1	84.6	81.4	75.8	109.6	100.3	126.6	103.7	98.4	91.4	85.4	94.2	119.7	130.6
FALSE	High	Master Protein	O14874	[3-methyl-2-oxobutanoate dehydrogenase [lipoamide]] kinase, mitochondrial OS=Homo sapiens GN=BCKDK PE=1 SV=2	0	6.54622	3.39806	1	11	1	1	412	46.331	8.82	Phospho [S31(98.4)]	0.913	1.697	1.262	1.171	0.432	1.303	1.145	1.41	1.114	0.947	0.921	1.187	1.14	0.911	1.345	1.15	1.034	1.365	79.5	99.8	99.3	113.5	103.5	117.2	87.1	139	115.5	74.6	103.4	91.3	94.2	81.9	44	96.5
FALSE	High	Master Protein	Q9UKS6	Protein kinase C and casein kinase substrate in neurons protein 3 OS=Homo sapiens GN=PACSIN3 PE=1 SV=2	0	6.54622	10.3774	2	7	2	1	424	48.457	6.18	Phospho [S354(99.9); S383(100)]	0.865	0.792	0.949	0.638	1.582	0.667	0.871	0.55	0.654	1.096	0.871	0.66	0.817	0.975	0.869	0.734	0.901	0.757	105.3	106.1	99.5	81.2	80.3	105.9	121.8	98	68.1	120.8	117.5	81	90.8	123.8	161.8	112.1
FALSE	High	Master Protein	Q14678	KN motif and ankyrin repeat domain-containing protein 1 OS=Homo sapiens GN=KANK1 PE=1 SV=3	0	6.54622	1.10947	1	6	1	1	1352	147.197	5.3	Phospho [S325(100)]	0.867	0.492	0.593	0.597	0.577	0.992	1.079	1.023	0.887	1.7	0.888	1.034	0.625	0.71	1.028	0.607	0.904	0.67	91.6	114	66.1	104.9	109.2	108.6	105.7	64.9	134.8	93.5	78.2	116.9	80	131.8	63.7	187.8
FALSE	High	Master Protein	Q9UJ70	N-acetyl-D-glucosamine kinase OS=Homo sapiens GN=NAGK PE=1 SV=4	0	6.54622	4.65116	1	4	1	1	344	37.352	6.24	Phospho [S76(100)]	1.515	0.727	1.013	0.758	0.809	0.818	1.163	0.916	0.736	1.51	0.861	0.886	1.031	1.032	0.665	0.948	1.27	0.754	149.9	115	102	80.9	87.6	65.8	98.9	79.8	100.6	113.4	111.3	80.9	104.2	109.9	81.3	151.8
FALSE	High	Master Protein	Q13541	Eukaryotic translation initiation factor 4E-binding protein 1 OS=Homo sapiens GN=EIF4EBP1 PE=1 SV=3	0.00192988	6.54614	26.2712	1	33	1	1	118	12.572	5.48	Phospho [T46(88.5)]	0.994	1.07	1.459	1.325	2.338	0.832	0.721	0.645	0.391	0.645	0.597	0.61	0.863	1.53	0.729	0.485	1.208	1.059	121	87.8	105.1	101.4	74.2	88.8	121.8	113.8	68.6	162.8	155.2	41.6	51.6	106.4	200.3	55.2
FALSE	High	Master Protein	Q9BTU6	Phosphatidylinositol 4-kinase type 2-alpha OS=Homo sapiens GN=PI4K2A PE=1 SV=1	0.00192988	6.54565	6.68058	2	11	2	1	479	53.989	8.29	Phospho [S47(100); S51(100); S462(100)]	1.171	0.803	1.075	0.747	1.107	1.033	1.025	0.997	0.778	1.115	0.681	0.832	0.976	1.292	1.054	1.164	1.296	0.797	115.6	101.2	96.4	102	82.1	104.1	98.7	79.1	98.1	127.2	105.9	76.6	114.6	98.5	114.9	115.7
FALSE	High	Master Protein	O75643	U5 small nuclear ribonucleoprotein 200 kDa helicase OS=Homo sapiens GN=SNRNP200 PE=1 SV=2	0.00192988	6.54459	0.749064	1	6	1	1	2136	244.353	6.06	Phospho [S225(100)]	0.799	0.586	1.022	0.791	1.673	0.692	0.695	0.553	0.612	1.51	0.899	0.62	0.699	1.192	0.865	0.901	0.939	0.977	104.1	90.6	91.1	90.2	80.9	112.7	130.4	69.9	66	142.2	122	73.1	107.5	119.3	150.4	135.7
FALSE	High	Master Protein	P49840	Glycogen synthase kinase-3 alpha OS=Homo sapiens GN=GSK3A PE=1 SV=2	0.00192988	6.54443	2.27743	1	15	1	1	483	50.949	8.75	Phospho [S278(98.9)]	1.312	0.63	1.285	0.753	0.73	1.425	0.924	0.988	0.666	1.026	0.543	0.865	1.249	1.193	1.17	1.261	0.9	0.793	115.6	81.4	110	125.5	76.2	103.1	88.1	62.8	98.5	118.9	128	66.4	125.7	99.7	89	125
FALSE	High	Master Protein	O75475	PC4 and SFRS1-interacting protein OS=Homo sapiens GN=PSIP1 PE=1 SV=1	0.00192988	6.52827	6.22642	2	9	2	1	530	60.067	9.13	Phospho [S106(99.1)]	0.837	0.926	1.11	0.995	0.867	1.127	1.025	0.902	0.922	1.155	0.904	0.952	0.817	0.947	1.057	0.83	0.888	1.221	85.9	105.3	84	115.8	97.8	108.6	102.7	97.7	95.1	99.9	117	97.3	87.5	105.5	86.3	115
FALSE	High	Master Protein	Q92922	SWI/SNF complex subunit SMARCC1 OS=Homo sapiens GN=SMARCC1 PE=1 SV=3	0.00192988	6.50759	1.35747	1	11	1	1	1105	122.79	5.76	Phospho [S328(100); S330(100)]	0.677	1.047	1.374	1.119	0.386	0.854	0.775	0.893	0.895	0.656	0.82	0.814	0.768	0.747	0.932	0.845	1.091	1.577	81.4	93.2	92.3	102.7	98	112.1	120.3	107.8	91.9	76.9	141.4	92.1	87	102.9	40.6	69.1
FALSE	High	Master Protein	P17029	Zinc finger protein with KRAB and SCAN domains 1 OS=Homo sapiens GN=ZKSCAN1 PE=1 SV=3	0.00192988	6.5044	2.30906	1	6	1	1	563	63.59	7.05	Phospho [S13(98.9)]	0.779	1.027	0.865	0.785	0.77	0.839	0.824	0.774	0.849	1.112	0.792	0.839	0.725	1.032	0.761	0.952	1.009	0.777	94.5	100.1	88	101.8	101.8	92.4	121.4	110.6	83.4	111.2	93.2	91.5	102.5	107.7	86.4	124.7
FALSE	High	Master Protein	O00151	PDZ and LIM domain protein 1 OS=Homo sapiens GN=PDLIM1 PE=1 SV=4	0.00192988	6.49155	8.51064	2	11	2	1	329	36.049	7.02	Phospho [S90(100); S213(97.4)]	0.97	1.109	0.622	0.257	0.739	1.442	0.882	1.09	1.672	1.072	0.861	1.066	0.939	0.859	0.951	0.816	1.29	0.41	93.6	85.2	90.7	139.2	102.9	91.8	96.5	108.3	106.5	83.9	60.7	163.3	79.7	97.7	91.9	133.4
FALSE	High	Master Protein	P84103	Serine/arginine-rich splicing factor 3 OS=Homo sapiens GN=SRSF3 PE=1 SV=1	0.00192988	6.45895	9.14634	2	4	2	1	164	19.318	11.65	Phospho [S108(100)]	0.779	1.144	1.003	1.079	0.359	0.988	1.102	1.099	0.936	0.741	0.827	0.919	0.997	0.83	1.529	0.922	1.287	2.15	74.6	105.5	95.4	94.5	88	146.3	95.7	115.4	111	83.8	101.2	94.5	93.1	101	33.7	69.7
FALSE	High	Master Protein	Q96K21	Abscission/NoCut checkpoint regulator OS=Homo sapiens GN=ZFYVE19 PE=1 SV=3	0.00192988	6.4517	5.09554	2	5	2	1	471	51.514	5.73	Phospho [S144(100); S354(100)]	0.833	0.868	0.807	0.778	2.715	1.24	0.797	1.032	1.437	1.372	1.379	1.015	1.004	1.02	1.223	0.726	1.082	0.83	82	78.4	98.8	122	99.9	120.4	98.4	88.2	104.9	103.6	82	146	73.8	101.6	207.6	104.9
FALSE	High	Master Protein	Q14669	E3 ubiquitin-protein ligase TRIP12 OS=Homo sapiens GN=TRIP12 PE=1 SV=1	0.00192988	6.42061	0.60241	1	12	1	1	1992	220.296	8.48	Phospho [S312(100)]	1.014	1.177	1.04	1.099	1.094	0.805	0.934	1.012	0.921	0.934	0.776	0.837	1.056	0.97	0.878	0.851	0.904	0.722	108.8	100.2	113.3	86.4	89.9	94.2	107.3	118.2	101.6	97.4	104.4	92.5	85.4	100.4	117.3	100.2
FALSE	High	Master Protein	Q9UMZ2	Synergin gamma OS=Homo sapiens GN=SYNRG PE=1 SV=2	0.00192988	6.41927	1.67428	2	5	2	1	1314	140.566	5.03	Phospho [S752(100)]	0.954	1.314	1.1	0.806	1.23	0.814	0.866	1.278	1.803	1.749	1.018	0.929	0.956	0.915	0.857	0.873	1.037	0.86	104.7	95	105	89.4	102	94.1	109.8	111.1	108	77.3	93	152.4	73.7	84.5	111.8	159
FALSE	High	Master Protein	P62753	40S ribosomal protein S6 OS=Homo sapiens GN=RPS6 PE=1 SV=1	0.00192988	6.41663	4.41767	2	5	2	1	249	28.663	10.84	Phospho [S235(100); S236(100); S240(94.2)]	1.198	0.648	0.66	0.633	0.205	1.253	1.404	1.361	1.626	0.934	1.784	1.088	1.225	0.974	1.25	0.899	1.096	0.742	99.6	116.7	101.9	104.2	90.5	103.9	83.2	63.3	132.9	95.1	64.5	158.8	87.8	97.6	22.4	102.2
FALSE	High	Master Protein	Q96HC4	PDZ and LIM domain protein 5 OS=Homo sapiens GN=PDLIM5 PE=1 SV=5	0.00192988	6.40305	4.69799	2	6	2	1	596	63.904	8.21	Phospho [S228(100)]	0.799	1.381	0.586	0.475	0.36	0.716	1.319	1.568	2.165	0.818	3.172	1.505	1.064	0.739	0.73	0.816	0.413	0.413	78.4	129.5	104.4	70.2	147.7	71.6	98.1	117.1	132.9	62.6	49.7	183.6	69.2	84.8	37.9	86.1
FALSE	High	Master Protein	S4R347	Formin-binding protein 1-like OS=Homo sapiens GN=FNBP1L PE=1 SV=1	0.00192988	6.39343	1.80624	1	12	1	1	609	70.482	6.64	Phospho [S295(98.9)]	1.162	1.693	1.607	0.772	0.289	1.509	0.894	0.871	0.971	0.897	0.706	0.854	1.13	0.834	1.266	0.806	1.079	0.659	104.1	80.1	101.2	135.2	76.5	113.4	89.6	152.3	78.3	75	144.5	87.4	72.5	90	37.5	116.2
FALSE	High	Master Protein	Q9NWW5	Ceroid-lipofuscinosis neuronal protein 6 OS=Homo sapiens GN=CLN6 PE=1 SV=1	0.00192988	6.39342	3.53698	1	4	1	1	311	35.896	8.87	Phospho [S31(100)]	0.642	0.837	1.6	0.785	0.283	0.868	0.62	0.799	0.708	0.66	0.43	0.688	0.551	0.72	0.94	1.066	0.633	0.772	84.6	81.8	72.7	114.5	90.7	124	131.8	87.1	83.1	74.9	166.4	73.6	110.9	104	43.4	101.3
FALSE	High	Master Protein	Q92522	Histone H1x OS=Homo sapiens GN=H1FX PE=1 SV=1	0.00192988	6.38129	5.16432	1	9	1	1	213	22.474	10.76	Phospho [S31(100)]	0.588	0.692	3.116	0.84	0.247	0.717	0.729	0.85	0.794	0.589	0.604	0.622	0.697	1.071	0.857	0.798	0.977	1.159	79	97.9	93.6	96.4	83.6	115.1	134.3	58.2	71.5	90.1	262.1	66.8	67.2	84.1	31.9	76.1
FALSE	High	Master Protein	Q9P206	Uncharacterized protein KIAA1522 OS=Homo sapiens GN=KIAA1522 PE=1 SV=2	0.00192988	6.37437	2.80193	2	5	2	1	1035	107.03	9.73	Phospho [S404(97.7); S545(100)]	0.813	1.225	0.868	1.056	0.414	1.46	0.865	1.03	0.99	0.791	0.842	0.846	1.043	1.027	1.045	1.068	1.143	0.992	80.4	85.6	103.2	144.6	83.7	103.5	99	119	100	99.8	84.3	96.1	103.7	97.1	46.5	88.8
FALSE	High	Master Protein	O95747	Serine/threonine-protein kinase OSR1 OS=Homo sapiens GN=OXSR1 PE=1 SV=1	0.00192988	6.36915	3.98482	1	6	1	1	527	57.986	6.43	Phospho [S339(100)]	1.099	1.202	1.315	1	2.182	0.811	0.896	1.218	1.014	1.573	1	1.102	1.01	2.197	0.978	1.453	2.092	0.394	111.6	90.9	102.6	82.3	111.9	99.2	101.5	89.5	90.7	163.6	97.9	75.5	108.2	74.5	165.3	119.1
FALSE	High	Master Protein	O75764	Transcription elongation factor A protein 3 OS=Homo sapiens GN=TCEA3 PE=1 SV=2	0.00192988	6.36661	4.88506	1	6	1	1	348	38.947	9.19	Phospho [S115(100)]	1.012	0.77	0.827	0.804	1.236	0.905	0.839	1.114	1.217	1.214	1.036	1.087	1.376	0.726	0.728	0.662	1.447	0.814	101.9	84.6	138.7	91.2	109.5	73.4	100.7	85.4	123.4	80.4	91.7	134.9	73.4	110.8	114.6	112.5
FALSE	High	Master Protein	P25788	Proteasome subunit alpha type-3 OS=Homo sapiens GN=PSMA3 PE=1 SV=2	0.00192988	6.36345	5.4902	1	12	1	1	255	28.415	5.33	Phospho [S250(100)]	1.095	0.507	0.908	0.644	1.103	1.015	0.883	0.95	0.497	2.038	0.616	0.908	0.986	0.917	1.182	1.049	1.126	1.101	108.4	87.4	97.6	100.5	89.9	117.1	99	60.9	114.1	110.2	109	59.7	125.9	120.1	101.2	187
FALSE	High	Master Protein	A0A0B4J1V8	HCG2039996 OS=Homo sapiens GN=PPAN-P2RY11 PE=3 SV=1	0.00192988	6.3593	1.76322	1	6	1	1	794	87.862	9.51	Phospho [S359(100)]	1.081	0.819	1.141	0.735	0.523	1.197	0.897	0.7	0.751	0.742	0.643	0.975	1.151	0.92	1.256	0.966	0.789	1.106	100.1	83	106.7	110.9	90.4	116.3	92.6	91	77.8	102.3	126.8	83.5	107.4	111.2	66.1	93.8
FALSE	High	Master Protein	O95999	B-cell lymphoma/leukemia 10 OS=Homo sapiens GN=BCL10 PE=1 SV=1	0.00192988	6.35511	4.72103	1	6	1	1	233	26.235	5.74	Phospho [S138(100)]	0.887	1.234	1.02	0.868	0.608	1.23	0.787	0.864	1.2	0.862	0.694	0.695	0.774	0.836	0.857	0.745	1.045	1.028	99.6	88.4	87	138.2	78.1	96.3	112.3	125.2	87.7	84.8	103.5	121.7	75.6	101.5	69.7	98.8
FALSE	High	Master Protein	O94885	SAM and SH3 domain-containing protein 1 OS=Homo sapiens GN=SASH1 PE=1 SV=3	0.00192988	6.34431	1.76423	2	7	2	1	1247	136.568	6.09	Phospho [S137(100); S407(98.6)]	1.121	0.951	0.904	1.058	0.282	1.341	1.265	1.086	0.86	1.042	0.923	1.238	1.422	0.854	1.416	1.026	0.613	0.842	89.2	100.6	113.1	106.6	98.4	112.6	79.5	99.7	113.8	89.5	94.7	90.1	107.5	104.8	34.3	126.6
FALSE	High	Master Protein	B5ME19	Eukaryotic translation initiation factor 3 subunit C-like protein OS=Homo sapiens GN=EIF3CL PE=3 SV=1	0.00192988	6.33633	1.53173	1	8	1	1	914	105.407	5.64	Phospho [S39(100)]	0.897	0.525	1.014	0.518	1.28	0.767	0.641	0.567	0.471	1.541	0.77	0.589	0.703	0.799	1.04	0.969	0.666	0.861	111.4	79.6	87.2	95.3	73.2	129.1	124.2	68.8	74.3	104.6	132.8	61.7	126.9	130.9	135	162.5
FALSE	High	Master Protein	Q86WC4	Osteopetrosis-associated transmembrane protein 1 OS=Homo sapiens GN=OSTM1 PE=1 SV=1	0.00192988	6.24945	4.49102	2	19	2	1	334	37.233	6.01	Phospho [S325(97.3)]	1.21	0.948	0.896	0.879	2.825	1.071	0.858	0.824	0.717	1.541	0.699	0.728	0.928	0.982	0.905	0.747	1.333	0.965	126.4	89.7	97	111.9	76	94.5	104.5	108.6	94.3	112.4	102.5	82.1	85.6	114.5	214	116.7
FALSE	High	Master Protein	P49756	RNA-binding protein 25 OS=Homo sapiens GN=RBM25 PE=1 SV=3	0.00192988	6.23808	3.44009	2	8	2	1	843	100.124	6.32	Phospho [S583(100); S677(100)]	1.081	0.865	1.461	1.157	1.374	0.925	0.726	0.836	0.671	1.199	0.943	0.765	1.079	0.86	0.939	0.976	1.036	1.501	116.2	77.9	115.9	99.4	82.2	100.9	107.4	90.8	87.7	90.2	153.4	70.4	102.5	104.9	117.2	102.2
FALSE	High	Master Protein	Q9Y6R9	Coiled-coil domain-containing protein 61 OS=Homo sapiens GN=CCDC61 PE=1 SV=3	0.00192988	6.23268	3.125	1	4	1	1	512	57.333	10.27	Phospho [S373(100)]	1.01	0.836	0.94	0.693	0.898	0.688	0.744	1.035	0.76	0.722	1.351	0.747	0.894	0.75	0.798	1.075	0.339	0.642	120.2	88.6	106.5	82	88.9	94.9	119	91.5	113.3	82	102.8	83.1	117.7	109.4	111.4	89.6
FALSE	High	Master Protein	Q6UXB4	C-type lectin domain family 4 member G OS=Homo sapiens GN=CLEC4G PE=1 SV=1	0.00192988	6.22234	5.11945	1	15	1	1	293	32.541	6.61	Phospho [S12(98.8)]	0.685	0.529	0.713	0.524	1.486	0.59	1.425	0.982	0.909	1.736	1.06	1.238	0.547	0.69	0.585	0.931	0.791	0.778	79	164.4	63.1	68	142.7	67.5	115.3	64.4	119.5	83.9	86.7	110.5	113.3	121.7	141.1	164.7
FALSE	High	Master Protein	Q9UJM3	ERBB receptor feedback inhibitor 1 OS=Homo sapiens GN=ERRFI1 PE=1 SV=1	0.00192988	6.15098	1.94805	1	4	1	1	462	50.528	8.1	Phospho [S369(100)]	0.815	1.056	0.916	1.084	0.474	1.175	1.166	1.274	1.416	0.711	1.412	1.312	1.067	0.649	1.442	0.853	0.858	0.796	71.6	102.3	93.6	103.1	115.1	126.6	87.8	103.2	124.5	63.4	89.5	138.3	83.3	97.7	52.3	78.5
FALSE	High	Master Protein	O94876	Transmembrane and coiled-coil domains protein 1 OS=Homo sapiens GN=TMCC1 PE=1 SV=3	0.00192988	6.14828	3.67534	2	5	2	1	653	72.038	6.55	Phospho [S382(100); S414(99.2)]	1.267	0.776	1.058	0.661	0.4	1.301	0.74	1.15	0.79	0.802	0.159	0.972	0.991	1.184	1.258	0.946	0.733	0.671	117.8	68.8	92.2	121	90.3	116.9	93	78.6	116.6	120	107.3	80.1	95.9	101.4	63.2	126.9
FALSE	High	Master Protein	Q96T60	Bifunctional polynucleotide phosphatase/kinase OS=Homo sapiens GN=PNKP PE=1 SV=1	0.00192988	6.12854	3.83877	1	7	1	1	521	57.04	8.46	Phospho [T118(100)]	0.962	1.256	0.963	0.899	0.711	0.825	0.896	0.73	0.917	0.914	0.733	0.88	1.059	0.967	0.93	1.041	0.952	0.856	102.8	95.7	113.2	88.1	94	99.3	106.8	127.9	74.3	98.4	98.1	93.3	106	101.8	82	105.5
FALSE	High	Master Protein	A0A0C4DG62	ADP-ribosylation factor-like protein 6-interacting protein 4 OS=Homo sapiens GN=ARL6IP4 PE=1 SV=1	0.00192988	6.09212	11.9266	2	7	2	1	218	24.577	10.95	Phospho [S129(100)]	1.06	1.775	1.062	0.696	1.715	1.215	1.357	1.12	1.23	1.388	0.693	1.102	1.394	1.04	0.936	0.84	0.776	0.695	92	117.8	121	105.5	95.6	81.2	86.8	154.1	97.2	90.2	92.2	106.7	72.9	86.8	172.4	139.5
FALSE	High	Master Protein	Q9BZZ5	Apoptosis inhibitor 5 OS=Homo sapiens GN=API5 PE=1 SV=3	0.00192988	6.03276	2.48092	1	3	1	1	524	58.968	7.34	Phospho [S464(100)]	1.21	0.576	2.72	1.458	0.242	1.464	0.777	0.736	0.678	0.676	0.685	0.934	1.556	0.959	1.33	1.068	1.031	1.307	102.4	65.8	131.7	123.9	79	112.6	84.6	52.1	66.6	86.7	246.1	61.3	96.6	90.5	26.5	73.9
FALSE	High	Master Protein	Q14005	Pro-interleukin-16 OS=Homo sapiens GN=IL16 PE=1 SV=4	0.00192988	6.03005	1.42643	2	7	2	1	1332	141.665	8.06	Phospho [S922(98); S972(99)]	0.887	1.106	0.66	0.912	0.58	0.947	1.324	2.121	1.877	0.832	0.707	1.38	0.876	0.705	0.984	0.882	0.849	1.249	83.9	125.3	82.9	89.6	130.5	93.1	94.6	92.7	177.8	59.1	55.3	157.3	73.9	83.8	66.3	95
FALSE	High	Master Protein	P19634	Sodium/hydrogen exchanger 1 OS=Homo sapiens GN=SLC9A1 PE=1 SV=2	0.00192988	6.02784	4.17178	2	4	2	1	815	90.705	7.21	Phospho [S703(100); S785(96.7)]	0.891	0.937	0.705	0.743	1.968	0.693	1.021	0.869	1.31	1.519	1.036	0.925	0.816	1.063	0.789	1.163	1.188	1.072	101.6	116.5	93.1	79.1	105.5	90	114.1	93.1	86.3	105.6	70	130.1	115.5	99.3	161.6	124.7
FALSE	High	Master Protein	O43933	Peroxisome biogenesis factor 1 OS=Homo sapiens GN=PEX1 PE=1 SV=1	0.00192988	6.00774	2.41621	2	7	2	1	1283	142.778	6.33	Phospho [S1181(100); S1211(98)]	0.835	1.202	0.872	1.09	0.755	0.734	0.97	0.994	0.965	0.814	0.911	0.838	0.829	1.035	0.795	0.977	0.884	0.851	97.4	113.2	96.7	85.6	97.7	92.7	116.7	119.4	98.8	102.9	86.6	95.9	97.1	99.3	83.8	90.4
FALSE	High	Master Protein	Q8ND56	Protein LSM14 homolog A OS=Homo sapiens GN=LSM14A PE=1 SV=3	0.00192988	5.99699	11.0151	3	10	3	1	463	50.499	9.52	Phospho [S183(100); S216(99.9)]	0.942	1.761	0.911	2.182	0.354	1.013	1.019	1.047	1.112	0.73	0.899	0.839	1.135	0.636	0.977	0.725	0.644	0.829	95.2	103	114.7	102.4	84.8	98.8	101.1	171.4	101.9	61.9	88.7	108.2	70.6	97.3	37.4	77
FALSE	High	Master Protein	P11717	Cation-independent mannose-6-phosphate receptor OS=Homo sapiens GN=IGF2R PE=1 SV=3	0.00192988	5.9746	1.40506	2	5	2	1	2491	274.199	5.94	Phospho [S2484(100)]	1.093	0.813	0.824	0.682	0.994	0.992	0.931	0.614	0.446	1.138	0.55	0.893	0.72	0.789	1.004	0.695	1.117	0.839	115.4	98.2	76	104.7	94.2	105.9	105.6	109.9	83	106.5	111.3	60.3	93.9	135.1	110.1	126.1
FALSE	High	Master Protein	O95453	Poly(A)-specific ribonuclease PARN OS=Homo sapiens GN=PARN PE=1 SV=1	0.00192988	5.90973	3.44288	2	4	2	1	639	73.405	6.2	Phospho [S557(100); S619(100)]	0.96	0.85	0.976	0.893	0.674	1.186	0.807	1.182	0.835	0.625	0.76	0.986	0.891	0.998	1.11	0.964	0.858	1.004	96.8	81.4	89.9	119.6	99.4	112	100.9	87.4	121.6	102.7	100.4	85.9	99.2	102.9	81.2	75.2
FALSE	High	Master Protein	P50479	PDZ and LIM domain protein 4 OS=Homo sapiens GN=PDLIM4 PE=1 SV=2	0.00192988	5.90058	4.84848	1	10	1	1	330	35.376	7.91	Phospho [S112(98.4)]	0.846	0.626	0.818	0.569	2.23	0.695	0.703	0.767	0.665	0.945	0.536	0.539	0.55	1.223	0.721	1.08	0.709	0.677	117.2	97.4	76.1	96.2	74.7	99.8	138.5	70.9	86.9	138.5	92.7	75.3	122.4	113.3	234.2	99.3
FALSE	High	Master Protein	Q02790	Peptidyl-prolyl cis-trans isomerase FKBP4 OS=Homo sapiens GN=FKBP4 PE=1 SV=3	0.00192988	5.84741	3.05011	1	4	1	1	459	51.772	5.43	Phospho [S451(100)]	1.022	1.25	1.289	0.979	1.144	0.795	0.775	1.188	1.465	0.88	0.699	0.86	0.872	0.938	0.819	1.092	1.147	0.936	116.5	88.3	99.4	90.6	98	93.3	113.9	106.4	101.2	79.9	109.7	124.7	93	85.1	118	90.8
FALSE	High	Master Protein	Q9UBC2	Epidermal growth factor receptor substrate 15-like 1 OS=Homo sapiens GN=EPS15L1 PE=1 SV=1	0.00192988	5.82178	3.24074	2	5	2	1	864	94.197	5.11	Phospho [S229(100); S593(100)]	1.068	1.352	0.795	0.702	0.817	1.523	1.448	1.038	1.575	1.002	1.023	1.401	0.892	0.799	1.559	0.774	1.019	0.491	84.1	114	70.2	119.9	110.3	122.7	78.7	129	99.1	76.3	75.9	150.4	73.9	95.5	94.5	115.8
FALSE	High	Master Protein	Q15596	Nuclear receptor coactivator 2 OS=Homo sapiens GN=NCOA2 PE=1 SV=2	0.00192988	5.81844	1.36612	2	9	2	1	1464	159.056	6.64	Phospho [S699(98.6); S736(100)]	1.06	1.274	1.126	1.208	0.352	0.868	0.986	0.997	0.846	0.682	0.729	1.105	1.119	0.719	1.061	0.889	0.992	1.028	103	95.9	108.8	84.4	107.5	103.1	97.2	130.2	101.9	73.4	115.1	86.4	90.9	102.2	41.1	79.8
FALSE	High	Master Protein	Q8NBP7	Proprotein convertase subtilisin/kexin type 9 OS=Homo sapiens GN=PCSK9 PE=1 SV=3	0.00192988	5.73291	1.44509	1	4	1	1	692	74.239	6.61	Phospho [S688(100)]	1.533	0.778	0.801	0.644	1.34	1.037	0.99	0.876	0.77	0.939	0.61	0.818	1.111	0.861	0.96	0.859	0.768	0.788	144.1	93	104.4	97.5	76.9	90.2	94	91.6	103.1	101.3	94.3	90.7	101.1	117.8	154.1	107.9
FALSE	High	Master Protein	Q92539	Phosphatidate phosphatase LPIN2 OS=Homo sapiens GN=LPIN2 PE=1 SV=1	0.00192988	5.66639	3.57143	2	6	2	1	896	99.337	5.33	Phospho [S303(100)]	0.821	0.866	0.468	0.323	0.758	0.569	0.552	0.641	0.589	1.42	0.888	0.537	0.772	0.576	0.928	0.518	0.318	0.431	110.9	74.6	104.3	76.9	72.6	125.5	135.2	130.1	96.4	86.5	70.3	88.5	77.9	150.3	103.3	193.4
FALSE	High	Master Protein	K7EM05	Acyl-CoA binding domain containing 4 isoform 4 OS=Homo sapiens GN=ACBD4 PE=1 SV=1	0.00192988	5.64646	4.83271	1	4	1	1	269	29.658	5.17	Phospho [S166(100)]	0.832	1.245	0.954	1.188	0.52	1.211	1.036	1.481	1.532	0.798	1.273	1.117	0.918	0.844	1.192	1.089	1.489	1.226	79.7	99.3	87.9	116.1	107	114.2	95.8	107	127.3	72.6	82	131.7	93.6	85.9	48.6	74.5
FALSE	High	Master Protein	P18754	Regulator of chromosome condensation OS=Homo sapiens GN=RCC1 PE=1 SV=1	0.00192988	5.6008	2.61283	2	8	2	1	421	44.941	7.52	Phospho [S11(100)]	0.893	0.765	1.271	1.516	0.733	0.961	0.965	1.008	0.932	1.061	1.247	0.865	1.027	0.818	1.032	0.901	1.061	1.665	92.7	100.2	106.6	99.7	89.8	107.1	103.8	80	105.4	85.5	132.8	97.5	94.2	104.6	61.9	89.7
FALSE	High	Master Protein	Q53EL6	Programmed cell death protein 4 OS=Homo sapiens GN=PDCD4 PE=1 SV=2	0.00192988	5.56638	2.1322	1	8	1	1	469	51.703	5.21	Phospho [S94(98.8)]	1.03	0.869	0.977	0.773	0.578	0.762	1.042	1.368	0.919	1.173	1.032	1.081	0.834	1.29	0.736	1.349	0.813	0.851	111.2	112.5	90	82.2	116.7	79.4	107.9	78.3	123.2	116.2	88	82.8	121.5	90.1	65	132
FALSE	High	Master Protein	Q96A00	Protein phosphatase 1 regulatory subunit 14A OS=Homo sapiens GN=PPP1R14A PE=1 SV=1	0.00192988	5.54462	10.8844	1	9	1	1	147	16.683	9.38	Phospho [S128(100)]	1.468	0.692	0.786	0.695	1.448	0.726	1.021	1.06	0.725	1.079	0.716	0.8	0.847	1.222	0.731	1.263	0.737	0.728	155.9	108.4	89.9	77.1	85	77.6	106.2	71.8	109.9	126.7	81.6	75.2	131	103.7	158.3	118
FALSE	High	Master Protein	Q8TB72	Pumilio homolog 2 OS=Homo sapiens GN=PUM2 PE=1 SV=2	0.00192988	5.49	0.938086	1	7	1	1	1066	114.145	7.08	Phospho [S182(100)]	1.006	0.988	1.221	0.971	0.545	0.98	1.012	0.976	1.135	0.865	1.015	0.932	0.914	0.832	1.028	0.924	0.974	0.946	102.4	103.1	93.1	99.8	94.9	104.7	101.9	97.8	96.6	82.3	120.8	112.3	91.5	98.9	60.4	95.8
FALSE	High	Master Protein	Q92625	Ankyrin repeat and SAM domain-containing protein 1A OS=Homo sapiens GN=ANKS1A PE=1 SV=4	0.00192988	5.4787	2.1164	2	6	2	1	1134	123.032	6.38	Phospho [S647(98.9); S661(99.1)]	1.16	0.895	0.963	0.943	0.709	1.2	1.439	1.193	0.942	1.053	0.845	1.174	1.001	0.824	0.964	0.811	0.797	0.777	102.3	126.9	88.3	105.8	103.6	85	88.2	94.5	126	87	101.7	99.5	85.7	105.6	81	120.4
FALSE	High	Master Protein	Q6PJT7	Zinc finger CCCH domain-containing protein 14 OS=Homo sapiens GN=ZC3H14 PE=1 SV=1	0.00192988	5.4756	4.07609	2	7	2	1	736	82.823	7.31	Phospho [S515(100)]	1.297	0.965	1.112	1.316	0.396	0.826	1.042	0.814	0.755	0.877	1.022	0.925	1.08	0.907	0.975	1.036	1.319	1.115	127	102.1	105.8	80.9	90.6	95.6	98	102.5	86.5	96.3	118.2	80.2	110.1	106.2	39.3	87.2
FALSE	High	Master Protein	Q15417	Calponin-3 OS=Homo sapiens GN=CNN3 PE=1 SV=1	0.00192988	5.44798	3.34347	1	6	1	1	329	36.391	6.05	Phospho [S323(100)]	1.085	0.84	0.874	0.832	2.209	0.85	0.941	0.838	0.762	1.473	0.838	0.844	0.964	0.999	0.833	0.73	1.117	0.888	116.5	101.1	103.6	91.3	90.6	89.5	107.4	97.3	97.1	115.7	101.2	88.3	84.5	115.8	185.1	123.4
FALSE	High	Master Protein	Q9Y618	Nuclear receptor corepressor 2 OS=Homo sapiens GN=NCOR2 PE=1 SV=2	0.00192988	5.42639	0.990099	2	4	2	1	2525	274.635	7.59	Phospho [S1982(98.4); S2269(100)]	1.066	1.145	0.807	0.969	0.416	1.157	1.136	0.979	1.055	0.951	1.27	0.974	1.038	0.712	1.298	0.677	1.041	0.756	97.3	103.7	94.7	105.6	88.9	118.5	91.3	125.8	107.5	78.1	88.6	115.8	74.3	109.8	45.5	103.9
FALSE	High	Master Protein	P35251	Replication factor C subunit 1 OS=Homo sapiens GN=RFC1 PE=1 SV=4	0.00192988	5.41618	2.26481	2	10	2	1	1148	128.175	9.36	Phospho [S69(94); S368(98.6)]	1.097	0.999	1.055	0.737	1.504	0.861	0.884	0.837	0.851	1.411	1.138	0.723	1.137	0.816	1.03	0.892	1.156	0.835	114.1	91.9	118.2	89.5	75.2	107.1	104	108.4	90.8	88.5	114.5	92.4	96.8	108.5	135.3	127
FALSE	High	Master Protein	J3KPD3	RNA binding motif protein 7, isoform CRA_c OS=Homo sapiens GN=RBM7 PE=1 SV=1	0.00192988	5.40111	3.74532	1	6	1	1	267	30.572	9.57	Phospho [S137(100)]	0.777	1.165	0.718	0.502	1.503	0.901	0.839	0.808	1.001	1.008	1.08	0.746	0.61	0.816	0.784	0.712	1.296	0.468	96.1	103.8	75.5	111.5	92.3	97	123.7	131.1	91	91.8	80.8	112.7	80.1	112.5	153.4	102.9
FALSE	High	Master Protein	A0A087X0H9	RNA-binding protein 26 OS=Homo sapiens GN=RBM26 PE=1 SV=1	0.00192988	5.35281	1.09019	1	5	1	1	1009	113.725	9.16	Phospho [S127(100)]	0.826	1.224	0.597	1.197	0.244	1.141	0.891	1.069	0.956	0.647	0.9	0.95	1.02	0.661	1.212	0.774	0.909	1.24	82.1	88.6	101.4	113.4	94.5	120.5	99.4	136.4	119.1	73.7	66.5	106.5	86.3	111.4	27.9	73.7
FALSE	High	Master Protein	Q9H1B7	Interferon regulatory factor 2-binding protein-like OS=Homo sapiens GN=IRF2BPL PE=1 SV=1	0.00192988	5.29696	3.89447	2	8	2	1	796	82.607	8.24	Phospho [S547(100); S657(98.2)]	0.893	1.199	1.114	0.883	0.602	0.701	0.89	1.058	1.116	1.429	0.839	1.009	1.136	0.728	0.863	0.825	0.96	0.963	96.3	96	122.5	75.6	108.8	93	107.9	119.2	105.2	72.4	110.8	111	82.1	99.4	63.2	149.9
FALSE	High	Master Protein	A0A0C4DGG9	Chromodomain-helicase-DNA-binding protein 4 OS=Homo sapiens GN=CHD4 PE=1 SV=1	0.00192988	5.29312	1.13578	2	6	2	1	1937	220.336	6.02	Phospho [S100(98.3); S1560(99)]	1.166	0.873	1.195	0.981	0.586	1.042	1.054	1.111	0.845	0.937	0.805	0.877	1.534	0.962	0.951	0.974	1.388	1	107.1	96.8	140.8	95.7	80.5	87.3	91.8	87.8	111.7	96.8	120.2	85	98	100.6	61.3	98
FALSE	High	Master Protein	Q5JS72	Peripheral plasma membrane protein CASK OS=Homo sapiens GN=CASK PE=1 SV=1	0.00192988	5.17949	3.0888	1	13	1	1	518	59.327	6.54	Phospho [S192(97)]	1.089	0.598	1.696	0.413	1.357	0.875	0.911	0.862	0.737	1.214	0.625	0.922	0.697	1.354	0.897	1.155	0.48	0.784	119.3	99.7	76.4	95.8	101	98.3	109.5	56.6	81.5	128.1	160.4	69.7	109.2	94.6	161.7	144.7
FALSE	High	Master Protein	Q8WW12	PEST proteolytic signal-containing nuclear protein OS=Homo sapiens GN=PCNP PE=1 SV=2	0.00192988	5.12451	13.4831	1	7	1	1	178	18.913	7.49	Phospho [S119(100)]	0.77	1.094	0.958	1.046	1.186	0.691	0.872	1.118	0.858	1.046	0.863	0.892	0.822	0.933	0.884	0.876	1.23	0.918	90.8	102.9	97	81.6	105.3	104.3	118	112	114.5	95.5	98.1	87.8	89.7	102.4	113.9	100.4
FALSE	High	Master Protein	A0A0A0MRM9	Nucleolar and coiled-body phosphoprotein 1 (Fragment) OS=Homo sapiens GN=NOLC1 PE=1 SV=1	0.00192988	5.06633	3.9548	2	5	2	1	708	74.61	9.47	Phospho [S572(100); S697(98.1)]	0.889	1.064	1.652	0.967	0.548	1.351	1.145	0.915	1.123	0.989	1.093	1.177	0.973	0.933	1.322	1.071	1.213	1.347	79.2	102	86.7	120.4	104.9	117.8	89.1	96	82.6	84.2	149	101.4	96.7	90.2	53.6	96.7
FALSE	High	Master Protein	Q15390	Mitochondrial fission regulator 1 OS=Homo sapiens GN=MTFR1 PE=1 SV=2	0.00192988	5.03306	4.5045	1	6	1	1	333	36.977	9.01	Phospho [S119(100)]	1.133	0.949	0.943	1.297	1.12	1.078	0.852	0.461	1.128	1.195	0.876	0.83	1.28	0.858	1.102	0.732	0.846	1.176	109	82	123.2	103.7	79.8	106	96.2	109.4	53.1	99	108.8	130.1	84.4	115.3	104.4	111.4
FALSE	High	Master Protein	Q15121	Astrocytic phosphoprotein PEA-15 OS=Homo sapiens GN=PEA15 PE=1 SV=2	0.00192988	5.03127	6.92308	1	11	1	1	130	15.031	5.02	Phospho [S116(100)]	1.057	1.388	0.939	1.038	0.584	1.879	0.974	1.404	1.517	1.083	1	1.021	0.901	1.315	1.048	1.31	0.539	0.565	93.9	86.6	80	166.9	90.7	93.1	88.8	109.5	110.8	103.7	74.1	119.7	103.4	78.9	70.4	130.6
FALSE	High	Master Protein	Q9NR19	Acetyl-coenzyme A synthetase, cytoplasmic OS=Homo sapiens GN=ACSS2 PE=1 SV=1	0.00192988	5.00379	1.42653	1	15	1	1	701	78.529	6.46	Phospho [S30(100)]	1.706	0.492	0.486	0.425	0.739	1.147	0.881	0.904	0.729	1.093	0.681	0.959	3.265	0.772	0.762	0.729	0.52	0.429	122.9	63.4	235.2	82.6	69	54.9	72	67.3	123.8	105.8	66.6	99.8	99.8	136.9	105.8	156.6
FALSE	High	Master Protein	O95049	Tight junction protein ZO-3 OS=Homo sapiens GN=TJP3 PE=1 SV=3	0.00192988	4.96327	2.06746	2	4	2	1	919	101.335	6.76	Phospho [S203(100); S346(100)]	0.851	0.816	0.849	0.712	0.705	0.898	1.286	1.01	0.953	1.06	0.93	1.264	0.952	0.954	0.912	0.897	1.068	0.871	83.2	125.6	93	87.7	123.5	89.1	97.7	88.2	109.2	103.1	91.7	102.9	96.9	108	77.7	117
FALSE	High	Master Protein	Q9BTA9	WW domain-containing adapter protein with coiled-coil OS=Homo sapiens GN=WAC PE=1 SV=3	0.00192988	4.95908	1.5456	1	5	1	1	647	70.681	9.45	Phospho [S511(100)]	0.468	0.922	0.686	0.76	0.178	0.759	0.766	0.839	0.783	0.4	0.594	0.537	0.568	0.609	0.979	0.981	0.57	1.098	64.5	105.6	78.3	104.6	74.1	135	137.9	110.9	100.9	73.2	82.5	94.2	118	120.3	27.1	60.8
FALSE	High	Master Protein	Q96JP5	E3 ubiquitin-protein ligase ZFP91 OS=Homo sapiens GN=ZFP91 PE=1 SV=1	0.00192988	4.93951	5.08772	2	8	2	1	570	63.406	7.36	Phospho [S82(99.8); S83(99.8); S103(100)]	0.995	1.175	0.927	1.284	0.301	1.266	1.05	1.209	0.881	0.708	0.934	0.88	1.123	0.783	1.193	0.798	1.357	1.094	92.8	97.9	104.7	118.1	82.1	111.2	93.2	121.5	125	80.9	95.8	91	82.5	103.3	31.6	74.2
FALSE	High	Master Protein	A0A087X188	Bridging integrator 2 OS=Homo sapiens GN=BIN2 PE=1 SV=1	0.00192988	4.92392	3.51759	2	5	2	1	597	64.984	5.38	Phospho [S427(100); S490(98.5)]	0.967	0.907	0.97	1.075	0.316	0.896	0.919	1.595	1.326	0.74	0.97	1.114	0.797	0.881	0.965	0.967	1.01	1.037	101.7	96.6	83.8	94.2	117.1	101.5	105.1	83	146	80.7	88.8	121.3	88.5	91.5	36	84.3
FALSE	High	Master Protein	Q7Z7K6	Centromere protein V OS=Homo sapiens GN=CENPV PE=1 SV=1	0.00192988	4.91385	2.90909	1	5	1	1	275	29.927	9.73	Phospho [S47(100)]	0.562	1.118	1.142	1.271	0.229	0.947	1.48	1.813	1.363	0.551	1.158	0.99	0.638	0.577	0.934	0.744	0.841	1.218	60.1	158.1	68.2	101.2	105.8	99.8	106.9	100.9	163.6	52.1	103	123	67.1	90.2	25.5	61.5
FALSE	High	Master Protein	Q7Z4V5	Hepatoma-derived growth factor-related protein 2 OS=Homo sapiens GN=HDGFL2 PE=1 SV=1	0.00192988	4.85647	4.17288	2	7	2	1	671	74.272	7.49	Phospho [S137(98.4); S652(100)]	1.461	0.984	1.088	0.896	0.971	1.11	1.305	0.954	0.872	0.975	0.778	1.109	1.259	1.078	1.072	0.982	1.136	0.929	123	109.8	106	93.4	93.4	90.3	84.2	99	96	108.5	109.4	87.7	98.8	100.6	101.7	102.1
FALSE	High	Master Protein	Q92733	Proline-rich protein PRCC OS=Homo sapiens GN=PRCC PE=1 SV=1	0.00192988	4.84368	4.88798	1	4	1	1	491	52.386	5.1	Phospho [S267(100)]	0.792	0.841	0.894	0.88	2.856	1.102	0.755	0.564	0.294	1.635	0.382	0.552	1.061	0.525	0.872	0.683	1.839	0.762	90.4	86.2	121.1	125.7	63	99.5	114.1	122.7	82.2	76.5	130.4	42.8	99.6	145.8	213.7	122.4
FALSE	High	Master Protein	Q9NR30	Nucleolar RNA helicase 2 OS=Homo sapiens GN=DDX21 PE=1 SV=5	0.00192988	4.80923	1.91571	1	3	1	1	783	87.29	9.28	Phospho [S121(100)]	0.886	0.644	1.059	0.835	0.939	0.695	0.715	0.985	0.865	1.012	0.856	0.721	0.869	0.948	0.744	0.999	1.25	1.022	110.2	88.9	108.1	86.4	89.7	92.5	124.3	69.4	106	102.1	114.1	93.2	107.6	107.7	95	102.5
FALSE	High	Master Protein	Q0JRZ9	F-BAR domain only protein 2 OS=Homo sapiens GN=FCHO2 PE=1 SV=2	0.00192988	4.8086	2.09877	2	6	2	1	810	88.869	6.86	Phospho [S394(100); S403(100)]	1	0.833	0.713	1.002	0.555	1.201	1.094	1.164	1.431	1.13	1.238	1.187	0.995	0.816	1.229	0.919	1.164	0.745	90.9	99.4	90.3	109.1	107.8	111.6	90.8	84.8	118.5	83	72.6	145.7	93.5	101.8	56.9	115.7
FALSE	High	Master Protein	Q13177	Serine/threonine-protein kinase PAK 2 OS=Homo sapiens GN=PAK2 PE=1 SV=3	0.00192988	4.7998	4.19847	2	18	2	1	524	58.006	5.96	Phospho [S141(100); S152(98.2)]	1.02	0.823	0.912	1.483	0.277	1.825	0.81	1.315	1.422	0.97	1.371	1.401	1.016	1.062	1.355	1.164	0.906	0.686	84.7	67.3	84.4	151.6	116.4	112.6	83.1	74.9	119.6	96.5	82.9	129.3	105.9	90.9	29	101.5
FALSE	High	Master Protein	Q96GX9	Methylthioribulose-1-phosphate dehydratase OS=Homo sapiens GN=APIP PE=1 SV=1	0.00192988	4.78428	3.71901	1	7	1	1	242	27.107	7.12	Phospho [S87(99)]	0.93	0.815	1.316	1.698	0.306	1.04	0.882	0.852	0.834	0.781	0.935	0.893	1.206	0.836	0.965	1.048	1.036	1.067	94.1	89.3	122.1	105.2	90.4	97.7	101.2	85.1	89	87.3	137.5	87.2	109.5	104.5	31.4	80.1
FALSE	High	Master Protein	Q13144	Translation initiation factor eIF-2B subunit epsilon OS=Homo sapiens GN=EIF2B5 PE=1 SV=3	0.00192988	4.72061	1.38696	1	6	1	1	721	80.329	5.08	Phospho [S544(100)]	1.385	0.647	1.11	0.762	0.57	0.874	0.896	1.368	1.062	2.025	0.982	0.884	1.001	1.044	0.832	0.998	0.756	0.66	141.1	91.2	102	89	90	84.7	101.9	62.7	132.5	101.1	107.5	102.8	96.6	96.8	59	209.8
FALSE	High	Master Protein	P49757	Protein numb homolog OS=Homo sapiens GN=NUMB PE=1 SV=2	0.00192988	4.65235	2.30415	1	11	1	1	651	70.759	8.51	Phospho [S634(100)]	1.137	1.104	0.985	0.619	0.97	0.874	1.018	1.239	1.582	1.117	1.763	1.647	1.25	0.974	0.778	0.882	1.062	0.716	103.3	92.5	113.6	79.4	149.6	70.7	90.9	99.5	111.7	87.8	88.7	142.6	79.5	90.1	93.7	107.9
FALSE	High	Master Protein	O94874	E3 UFM1-protein ligase 1 OS=Homo sapiens GN=UFL1 PE=1 SV=2	0.00192988	4.56325	2.01511	1	3	1	1	794	89.54	6.79	Phospho [S458(98.3)]	1.165	1.797	1.401	0.894	0.549	1.737	1.397	1.495	1.042	1.791	1.03	1.226	1.097	1.342	1.441	1.473	1.078	1.253	90	107.9	84.7	134.1	94.7	111.3	77.2	131.7	109.6	98.4	102.7	76.4	108	73.3	50.6	165.1
FALSE	High	Master Protein	Q9NWV8	BRISC and BRCA1-A complex member 1 OS=Homo sapiens GN=BABAM1 PE=1 SV=1	0.00192988	4.55313	3.34347	1	5	1	1	329	36.537	4.64	Phospho [S29(100)]	0.807	1.211	0.925	1.279	0.374	1.059	1.253	1.178	0.96	0.744	0.991	1.238	0.86	1.077	1.253	1.403	1.064	1.628	75.6	117.4	80.6	99.2	116	117.4	93.7	109.3	106.3	97.2	83.5	86.7	126.7	90.3	37	73.5
FALSE	High	Master Protein	A0A087WTT2	Transmembrane protein 230 OS=Homo sapiens GN=TMEM230 PE=1 SV=1	0.00192988	4.52415	11.0236	1	19	1	1	127	13.577	9.94	Phospho [S24(98.3)]	1.179	0.555	3.535	0.344	1.04	1.04	0.725	0.461	0.662	1.412	0.441	0.612	0.788	1.317	0.786	0.849	1.071	0.531	134.6	82.8	90	118.8	69.9	89.7	114.2	46.4	38.5	110	295.3	55.3	70.9	83.5	124.6	169.3
FALSE	High	Master Protein	Q9BVG4	Protein PBDC1 OS=Homo sapiens GN=PBDC1 PE=1 SV=1	0.00192988	4.50675	7.29614	2	3	2	1	233	26.041	4.79	Phospho [S197(100)]	1.052	1.154	1.113	0.871	1.967	0.929	0.989	1.059	1.24	1.435	1.053	0.903	1.017	0.839	1.099	1.012	0.913	1.142	105.4	99.1	101.9	93	90.4	110.1	100.2	108.9	100	79.2	105	117	95.5	94.4	164.3	119.9
FALSE	High	Master Protein	Q6KC79	Nipped-B-like protein OS=Homo sapiens GN=NIPBL PE=1 SV=2	0.00192988	4.44768	0.42796	1	7	1	1	2804	315.854	7.91	Phospho [S2658(100)]	0.915	0.551	1.87	0.53	0.471	0.976	0.878	0.791	0.683	0.702	0.432	0.83	0.775	1.228	0.97	1.085	0.434	0.361	100.9	96.9	85.5	107.7	91.5	107	110.3	53.5	76.8	119.3	181.6	66.3	105.4	97.1	84	125
FALSE	High	Master Protein	O15042	U2 snRNP-associated SURP motif-containing protein OS=Homo sapiens GN=U2SURP PE=1 SV=2	0.00192988	4.31154	1.65209	2	4	2	1	1029	118.219	8.47	Phospho [S930(97.8); S932(97.7); S985(100)]	0.375	0.96	0.833	1.098	0.303	0.473	0.629	1.314	0.803	0.997	0.945	0.499	0.477	0.682	1.9	1.213	1.746	1.978	49	82.2	62.4	61.8	65.2	248.5	130.8	98.7	135.2	70.1	85.7	82.6	124.8	102.9	26.3	86.5
FALSE	High	Master Protein	Q15056	Eukaryotic translation initiation factor 4H OS=Homo sapiens GN=EIF4H PE=1 SV=5	0.00192988	4.22799	3.62903	1	3	1	1	248	27.368	7.23	Phospho [S24(100)]	1.077	1.378	0.866	1.201	0.375	4.926	1.11	1.713	1.282	1.049	2.269	1.722	1.395	1.09	3.493	1.218	1.731	1.751	51.2	52.8	66.3	234.2	81.9	166.1	47.5	112.8	140.3	89.3	70.9	105	99.8	81.9	28	78.3
FALSE	High	Master Protein	Q96CB8	Integrator complex subunit 12 OS=Homo sapiens GN=INTS12 PE=1 SV=1	0.00192988	4.1149	1.94805	1	5	1	1	462	48.777	9.69	Phospho [S378(98.6)]	0.983	1.219	0.877	1.104	0.552	1.51	0.852	0.997	1.541	0.879	1.304	1.105	1.115	0.708	1.323	0.818	1.424	0.868	87.3	75.6	98.9	134	98.1	117.4	88.7	119.2	97.5	69.2	85.7	150.7	79.9	97.8	54.1	86.3
FALSE	High	Master Protein	A1L170	Uncharacterized protein C1orf226 OS=Homo sapiens GN=C1orf226 PE=1 SV=1	0.00192988	4.09945	3.67647	1	4	1	1	272	29.04	5.27	Phospho [S222(100); S223(100)]	0.935	0.814	0.95	0.717	0.408	1.089	1.073	1.108	0.923	0.708	0.863	1.065	1.044	0.898	1.102	0.943	0.966	1.126	89.6	102.8	100	104.3	102	105.5	95.8	85.9	116.9	94.7	100.2	97.3	99.4	105.5	49.3	85.6
FALSE	High	Master Protein	Q7Z2E3	Aprataxin OS=Homo sapiens GN=APTX PE=1 SV=2	0.00273088	3.68668	2.52809	1	4	1	1	356	40.714	9.17	Phospho [S132(100)]	0.845	0.956	0.87	0.879	0.293	1.382	1.126	1.037	1.01	0.761	1.004	1.309	0.922	0.679	1.375	0.929	0.798	1.084	74.3	99	81.1	121.5	115.2	120.9	88	103.3	112	73.3	94	109	100.4	108	35.3	91.5
FALSE	High	Master Protein	Q8N5F7	NF-kappa-B-activating protein OS=Homo sapiens GN=NKAP PE=1 SV=1	0.00273088	3.52549	3.61446	1	5	1	1	415	47.11	10.11	Phospho [S149(100)]	1.094	0.73	1.723	0.549	0.791	0.985	0.685	0.538	0.467	0.879	0.407	0.698	1.112	0.762	1.095	0.793	0.995	0.551	114.9	71.9	116.7	103.4	73.3	114.9	105	85	62.6	88.7	200.6	54.4	92.3	116.4	107.1	118.9
FALSE	High	Master Protein	Q9P2A4	ABI gene family member 3 OS=Homo sapiens GN=ABI3 PE=1 SV=2	0.00273088	3.40616	7.37705	1	8	1	1	366	39.011	5.08	Phospho [S342(100)]	0.776	0.307	0.848	0.888	3.11	0.384	0.817	0.486	0.81	1.68	0.24	0.673	0.745	1.104	0.71	0.702	0.356	0.899	106.4	112	102.2	52.7	92.2	97.3	137.1	40.9	64.7	147	112.9	107.8	93.5	133.2	266.4	143.9
FALSE	High	Master Protein	Q9NYB0	Telomeric repeat-binding factor 2-interacting protein 1 OS=Homo sapiens GN=TERF2IP PE=1 SV=1	0.00273088	3.36906	3.50877	1	6	1	1	399	44.233	4.73	Phospho [S203(100)]	0.759	0.812	0.829	0.602	0.338	1.252	0.838	0.781	0.91	0.683	0.697	1.034	0.827	0.639	0.937	0.796	0.745	0.706	79.9	88.2	87.1	131.9	108.9	98.7	105.3	98.5	94.8	77.6	100.6	110.4	96.6	121.4	49.6	100.2
FALSE	High	Master Protein	O43318	Mitogen-activated protein kinase kinase kinase 7 OS=Homo sapiens GN=MAP3K7 PE=1 SV=1	0.00273088	3.32726	2.9703	1	4	1	1	606	67.153	7.11	Phospho [S439(100)]	1.047	1.033	0.784	0.716	1.12	0.885	0.936	0.838	0.675	1.102	0.844	0.895	0.957	1.065	0.958	0.904	0.89	0.763	109.8	98.1	100.3	92.8	93.8	100.4	104.8	114.8	93.1	118.3	87.1	75	100.5	111.1	121.8	119.8
FALSE	High	Master Protein	P52756	RNA-binding protein 5 OS=Homo sapiens GN=RBM5 PE=1 SV=2	0.00273088	3.31265	2.33129	1	6	1	1	815	92.097	6.28	Phospho [S624(100)]	0.923	0.929	1.152	0.551	1.752	0.541	0.732	0.76	0.696	1.16	0.644	0.805	0.627	1.215	0.616	0.719	1.094	0.824	123.2	97.7	83.7	72.2	107.4	82.3	133.5	100.5	82.3	131.4	124.6	75.3	77.8	108.2	174.6	115.6
FALSE	High	Master Protein	O14558	Heat shock protein beta-6 OS=Homo sapiens GN=HSPB6 PE=1 SV=2	0.00273088	3.29568	8.75	1	6	1	1	160	17.125	6.4	Phospho [S16(100)]	0.861	0.708	0.773	0.7	0.385	1.042	1.272	1.073	0.983	0.874	0.879	0.944	0.783	0.944	1.007	0.999	0.769	0.712	87.2	128.9	79.3	105.6	95.6	102	101.3	76.5	115.9	102	83.5	106.2	107.9	108	50.7	115
FALSE	High	Master Protein	Q5JVS0	Intracellular hyaluronan-binding protein 4 OS=Homo sapiens GN=HABP4 PE=1 SV=1	0.00273088	3.27474	5.56901	1	6	1	1	413	45.758	7.46	Phospho [S108(100)]	1.189	1.363	0.769	1.215	1.678	1.045	0.847	0.956	0.989	1.157	1.002	0.829	1.096	0.975	0.838	0.85	1.33	1.083	121.6	86.7	112.1	106.9	84.8	85.7	102.3	138.2	96.9	98.9	78	100.4	86.2	101.4	138.8	95.6
FALSE	High	Master Protein	Q5VSL9	Striatin-interacting protein 1 OS=Homo sapiens GN=STRIP1 PE=1 SV=1	0.00273088	3.27311	2.03106	1	7	1	1	837	95.515	6.29	Phospho [S335(100)]	1.292	0.691	1.077	0.659	1.557	0.816	0.909	0.669	0.612	1.411	0.601	0.802	1	1.21	0.865	1.069	0.889	0.649	135.3	95.2	104.7	85.5	84	90.6	104.7	76.5	74	133.9	119.1	67.7	118.2	110.6	161.1	146
FALSE	High	Master Protein	Q9BX95	Sphingosine-1-phosphate phosphatase 1 OS=Homo sapiens GN=SGPP1 PE=1 SV=2	0.00273088	3.27311	2.94785	1	3	1	1	441	49.076	8.82	Phospho [S112(100)]	1.062	0.54	0.652	0.536	0.324	1.443	0.901	0.607	0.403	0.654	0.571	0.824	0.901	0.495	1.175	1.188	0.434	0.54	101.8	86.4	86.3	138.2	79	112.5	95.8	77.4	87	71	93.4	57.8	170.2	143.3	55.9	112.7
FALSE	High	Master Protein	Q9Y6K1	DNA (cytosine-5)-methyltransferase 3A OS=Homo sapiens GN=DNMT3A PE=1 SV=4	0.00273088	3.27311	1.64474	1	3	1	1	912	101.793	6.57	Phospho [S105(100)]	0.79	0.905	1.671	0.458	0.376	0.728	0.788	0.944	0.848	0.616	0.542	0.778	0.849	1.092	0.815	0.977	0.794	0.623	96.2	96	103.4	88.7	94.7	99.2	121.8	85.2	88.8	102.8	157.3	79.8	92	94.1	59.7	97.9
FALSE	High	Master Protein	Q9BWU0	Kanadaptin OS=Homo sapiens GN=SLC4A1AP PE=1 SV=1	0.00273088	3.27311	2.26131	1	4	1	1	796	88.759	5.19	Phospho [S466(100)]	0.786	0.762	0.621	0.451	1.65	0.526	0.849	0.882	1.151	1.134	0.737	0.978	1.074	0.649	0.537	0.676	0.957	0.732	95.7	103.3	130.7	64.1	119	65.4	121.7	92.9	107.5	79.1	75.7	140.3	82.4	121.9	173.4	119.2
FALSE	High	Master Protein	Q15124	Phosphoglucomutase-like protein 5 OS=Homo sapiens GN=PGM5 PE=1 SV=2	0.00273088	3.27311	4.05644	1	6	1	1	567	62.186	7.21	Phospho [S122(96.2)]	0.862	1.013	1.105	0.681	0.869	0.758	1.056	1.279	1.026	1.238	0.657	0.796	0.94	2.085	0.713	1.662	0.815	0.692	98.5	120.7	107.4	86.6	91	81.5	114.3	77.3	97.6	159.2	84.4	78.3	126.9	76.3	102.2	145.6
FALSE	High	Master Protein	Q8NDX5	Polyhomeotic-like protein 3 OS=Homo sapiens GN=PHC3 PE=1 SV=1	0.00273088	3.27311	1.93286	1	3	1	1	983	106.096	6.62	Phospho [T609(100); T614(100)]	1.053	1.095	1.079	1.198	1.416	0.862	0.953	0.843	1.002	1.242	0.759	0.781	1.09	0.672	0.821	0.641	1.013	1.122	112.4	101.7	116.3	92	83.3	87.6	106.7	121.1	93.2	74.3	119.3	110.7	70.9	110.6	127.9	112.1
FALSE	High	Master Protein	Q9Y6G9	Cytoplasmic dynein 1 light intermediate chain 1 OS=Homo sapiens GN=DYNC1LI1 PE=1 SV=3	0.00273088	3.27311	3.44168	1	6	1	1	523	56.544	6.42	Phospho [S207(100)]	0.911	0.666	1.051	0.68	1.777	0.741	0.745	0.73	0.767	1.323	0.692	0.855	0.898	1.205	0.824	0.759	1.119	0.895	106.8	87.3	105.2	86.8	100.2	96.5	117.2	75.4	82.8	136.5	119.1	86.9	86	113.3	166.2	123.7
FALSE	High	Master Protein	Q8TE77	Protein phosphatase Slingshot homolog 3 OS=Homo sapiens GN=SSH3 PE=1 SV=2	0.00273088	3.27311	3.0349	1	6	1	1	659	72.951	5.3	Phospho [S9(98.4)]	0.911	0.803	1.016	0.954	1.475	0.915	0.882	0.833	0.846	1.161	0.665	0.794	1.009	1.406	0.723	0.983	0.827	0.795	102.3	99	113.3	102.8	89.1	81.2	112.3	81.6	84.6	142.9	103.3	86	99.9	101.6	150.1	118.1
FALSE	High	Master Protein	F8W930	Insulin-like growth factor 2 mRNA-binding protein 2 OS=Homo sapiens GN=IGF2BP2 PE=1 SV=1	0.00273088	3.27311	2.80992	1	6	1	1	605	66.745	8.46	Phospho [S168(96.2)]	1.32	0.982	0.974	0.793	1.227	1.164	0.779	1.038	0.882	1.284	0.712	0.978	1.017	1.19	1.017	0.96	0.954	0.756	127	74.9	97.9	112	94.1	97.9	96.2	97.8	103.4	118.6	97	87.9	95.7	99.6	127.7	133.7
FALSE	High	Master Protein	Q5HYJ3	Protein FAM76B OS=Homo sapiens GN=FAM76B PE=1 SV=3	0.00273088	3.27311	4.12979	1	4	1	1	339	38.683	9.25	Phospho [S193(100)]	1.785	0.91	1.732	1.1	0.918	1.352	1.253	0.969	1.14	1.19	0.77	1.084	1.155	0.912	1.401	0.801	1.153	0.71	138.4	97.1	89.5	104.8	84	108.6	77.5	85.3	90.9	85.5	162.4	106.9	75.1	93.8	93.9	121.8
FALSE	High	Master Protein	B7ZBB8	Protein phosphatase 1 regulatory subunit 3G OS=Homo sapiens GN=PPP1R3G PE=1 SV=1	0.00273088	3.27311	3.91061	1	7	1	1	358	37.995	4.93	Phospho [S86(100)]	2.073	1.289	0.984	0.371	1.107	0.673	1.423	1.437	1.228	1.146	1.807	1.037	0.785	1.469	0.54	0.921	1.954	0.262	192.7	132.3	73	62.5	96.4	50.2	93	108.3	120.8	123.4	82.7	103.2	77.4	84.1	101.3	104.9
FALSE	High	Master Protein	Q8WXF1	Paraspeckle component 1 OS=Homo sapiens GN=PSPC1 PE=1 SV=1	0.00273088	3.27311	3.05927	1	7	1	1	523	58.706	6.67	Phospho [S477(100)]	0.911	1.301	0.675	0.893	0.684	1.129	0.799	0.91	1.124	0.831	0.695	0.791	1.292	0.741	0.943	0.812	0.865	0.99	92.9	81.5	131.8	115.1	80.6	96.2	102	138.8	97.1	79	72	119.8	86.6	106.7	80.4	97.6
FALSE	High	Master Protein	Q16514	Transcription initiation factor TFIID subunit 12 OS=Homo sapiens GN=TAF12 PE=1 SV=1	0.00273088	3.27311	6.8323	1	5	1	1	161	17.913	7.99	Phospho [S51(100)]	0.867	0.817	1.726	1.054	0.655	0.981	0.838	1.013	1.037	1.022	1.063	0.894	0.947	0.88	1.131	0.949	0.948	1.293	91.1	88.1	99.6	103.1	94	118.9	105.1	77.1	95.5	83	162.8	97.8	89.5	94.3	65.1	101.7
FALSE	High	Master Protein	Q9UHD8	Septin-9 OS=Homo sapiens GN=SEPT9 PE=1 SV=2	0.00273088	3.27311	2.73038	1	4	1	1	586	65.361	8.97	Phospho [S30(100)]	1.007	0.722	0.824	0.88	1.5	1.12	0.908	0.683	0.749	1.35	0.788	0.923	0.944	0.837	0.908	0.721	1.259	1.032	103.5	93.4	97.1	115.1	94.9	93.3	102.8	91.3	86.3	105.9	104.2	94.7	91.1	126.5	134.4	121
FALSE	High	Master Protein	Q9NP74	Palmdelphin OS=Homo sapiens GN=PALMD PE=1 SV=1	0.00273088	3.27311	3.26679	1	6	1	1	551	62.72	5.44	Phospho [S385(98.6)]	1.064	1.03	0.94	0.651	0.796	1.065	1.595	1.237	1.049	1.119	0.966	1.333	1.15	0.627	1.171	0.63	1.03	1.077	88.9	133.2	96.1	89	111.4	97.9	83.5	110.7	132.9	67.4	101.1	112.8	67.7	107.5	83.9	118
FALSE	High	Master Protein	Q01664	Transcription factor AP-4 OS=Homo sapiens GN=TFAP4 PE=1 SV=2	0.00273088	3.27311	3.25444	1	5	1	1	338	38.702	5.87	Phospho [S124(100)]	0.673	0.711	2.649	0.849	0.249	0.724	0.796	0.795	0.952	0.693	0.463	0.895	0.591	1.197	0.735	0.881	0.349	0.369	87.1	102.9	76.5	93.6	115.7	95	129.3	60.8	68	102.4	226.6	81.4	75.4	85.5	43.9	122.1
FALSE	High	Master Protein	O75387	Large neutral amino acids transporter small subunit 3 OS=Homo sapiens GN=SLC43A1 PE=1 SV=1	0.00273088	3.27311	3.22004	1	3	1	1	559	61.436	7.68	Phospho [S267(100)]	1.151	1.122	1.123	0.648	1.51	0.788	1.196	1.04	1.052	1.768	0.844	1.021	0.917	1.451	0.917	1.28	0.787	0.74	115.3	119.8	91.8	78.9	102.3	91.9	100.2	97.3	90.2	125.9	97.5	91.3	111	86.8	144.9	169.6
FALSE	High	Master Protein	Q5JTD0	Tight junction-associated protein 1 OS=Homo sapiens GN=TJAP1 PE=1 SV=1	0.00273088	3.27311	2.51346	1	5	1	1	557	61.783	5.97	Phospho [S300(100)]	0.956	1.406	2.012	0.759	1.067	0.769	0.937	1.018	1.086	1.315	0.958	0.656	0.874	0.95	0.985	0.956	0.944	0.442	108.3	106.2	99	87.2	74.4	111.6	113.3	116.8	84.6	78.9	167.1	90.2	79.4	83.1	115.2	141.9
FALSE	High	Master Protein	P0C1Z6	TCF3 fusion partner OS=Homo sapiens GN=TFPT PE=1 SV=1	0.00273088	3.27311	5.13834	1	6	1	1	253	28.261	5.21	Phospho [S252(100)]	1.126	1.011	1.136	0.863	2.673	1.069	0.999	0.63	0.659	1.475	0.79	0.979	1.394	0.806	1.054	0.622	1.302	0.73	103.5	91.8	128	98.2	89.9	96.8	91.8	120.7	75.2	96.3	135.6	78.6	74.3	119.4	211.8	116.9
FALSE	High	Master Protein	Q9BUR4	Telomerase Cajal body protein 1 OS=Homo sapiens GN=WRAP53 PE=1 SV=1	0.00273088	3.27295	4.19708	1	8	1	1	548	59.272	4.58	Phospho [S491(98.3)]	0.976	1.107	1.046	0.199	2.399	0.693	0.902	0.677	1.236	1.552	0.588	0.624	0.917	0.609	0.487	0.536	1.63	0.684	122	112.8	114.7	86.7	78	60.9	125	124.8	76.3	68.6	117.9	139.3	60.4	112.7	208.5	134.9
FALSE	High	Master Protein	P11388	DNA topoisomerase 2-alpha OS=Homo sapiens GN=TOP2A PE=1 SV=3	0.00273088	3.2598	0.718485	1	5	1	1	1531	174.276	8.72	Phospho [S1525(100)]	0.57	0.427	2.571	0.7	1.48	0.477	0.398	0.468	0.336	0.841	0.685	0.335	0.547	0.785	0.533	0.432	1.163	1.001	103.3	72.2	99.2	86.4	60.8	96.7	181.4	49.7	54.4	91.3	299	39	50.3	116.3	150.8	85.7
FALSE	High	Master Protein	P35269	General transcription factor IIF subunit 1 OS=Homo sapiens GN=GTF2F1 PE=1 SV=2	0.00273088	3.24527	4.64217	2	6	2	1	517	58.205	7.49	Phospho [T331(100); T445(97.9)]	1.214	0.683	1.061	1.63	0.503	0.745	0.864	0.839	0.897	0.845	1.28	1.009	0.976	1.157	0.692	1.129	1.374	1.257	130.7	93	105.1	80.2	108.7	74.6	107.7	70.7	86.8	119.7	109.8	92.8	116.8	103.4	44.6	75
FALSE	High	Master Protein	O95391	Pre-mRNA-splicing factor SLU7 OS=Homo sapiens GN=SLU7 PE=1 SV=2	0.00273088	3.24094	1.53584	1	5	1	1	586	68.344	7.14	Phospho [S215(100)]	0.929	1.224	1.079	1.394	0.446	1.109	0.953	1.486	1.392	0.918	1.226	1.09	1.034	1.02	1.168	1.156	1.535	1.31	89.3	91.6	99.3	106.5	104.8	112.3	96.1	102.5	124.5	85.5	90.4	116.6	96.8	83.8	39.9	82.1
FALSE	High	Master Protein	Q9H6S3	Epidermal growth factor receptor kinase substrate 8-like protein 2 OS=Homo sapiens GN=EPS8L2 PE=1 SV=2	0.00273088	3.21682	1.11888	1	5	1	1	715	80.57	6.84	Phospho [S217(100)]	0.834	1.072	0.638	0.94	0.36	1.496	1.023	1.236	0.903	0.945	0.935	0.995	1.163	0.63	1.494	0.803	1.278	1.052	73	89.5	101.7	130.8	87	130.6	87.4	119.4	137.8	70.2	71.1	100.6	89.5	111.4	38.7	101.6
FALSE	High	Master Protein	P46108	Adapter molecule crk OS=Homo sapiens GN=CRK PE=1 SV=2	0.00273088	3.21035	5.92105	1	11	1	1	304	33.81	5.55	Phospho [S43(94.4)]	0.815	1.713	0.773	0.669	0.89	1.229	0.719	1.38	1.238	1.374	1.183	0.916	0.978	0.84	1.002	0.801	1.096	0.535	85.6	75.6	102.8	129.2	96.3	105.3	105.1	154.8	124.7	75.9	69.9	111.9	72.4	90.4	92.3	142.6
FALSE	High	Master Protein	Q9NRA8	Eukaryotic translation initiation factor 4E transporter OS=Homo sapiens GN=EIF4ENIF1 PE=1 SV=2	0.00273088	3.19579	1.3198	1	6	1	1	985	108.134	8.32	Phospho [S564(100)]	0.829	0.91	0.745	1.45	0.355	1.205	0.977	0.735	0.967	0.387	1.112	1.074	0.954	0.644	1.009	0.761	0.473	0.589	82.3	97	94.8	119.7	106.7	100.2	99.3	110.6	89.3	78.3	90.5	117.5	92.4	121.5	46.3	50.4
FALSE	High	Master Protein	Q9HB58	Sp110 nuclear body protein OS=Homo sapiens GN=SP110 PE=1 SV=5	0.00273088	3.18957	2.17707	1	3	1	1	689	78.345	8.87	Phospho [S380(98.2)]	0.813	0.839	0.801	0.803	0.439	0.767	0.842	0.832	0.77	0.723	0.713	0.856	0.743	0.661	0.902	0.937	0.735	1.125	96.1	99.5	87.8	90.7	101.2	106.6	118.2	100.6	99.8	79.2	96	92.3	112.3	119.9	55.5	91.4
FALSE	High	Master Protein	Q9HCG8	Pre-mRNA-splicing factor CWC22 homolog OS=Homo sapiens GN=CWC22 PE=1 SV=3	0.00282885	3.03858	0.991189	1	3	1	1	908	105.402	7.03	Phospho [S829(100)]	0.737	1.161	1.751	0.856	0.202	0.986	1.009	0.882	1.104	0.537	0.697	0.811	0.937	0.733	1.066	1.046	1.087	0.773	78.8	107.9	100.2	105.4	86.7	114	106.9	105.9	80.4	66.9	159.7	100.6	95.4	91.2	27.5	73
FALSE	High	Master Protein	Q9UQN3	Charged multivesicular body protein 2b OS=Homo sapiens GN=CHMP2B PE=1 SV=1	0.00336474	2.83773	4.69484	1	6	1	1	213	23.891	8.76	Phospho [S199(100)]	1.031	0.996	0.79	1.006	0.902	1.174	0.897	0.991	0.945	0.862	0.79	0.826	1.286	0.722	0.944	0.777	1.042	1.345	100.9	87.7	125.7	114.8	80.8	92.3	97.8	112.1	111.5	81.3	88.8	106.3	87.5	112.5	90.9	86.9
FALSE	High	Master Protein	Q96Q42	Alsin OS=Homo sapiens GN=ALS2 PE=1 SV=2	0.00447284	2.51841	0.8449	1	5	1	1	1657	183.518	6.27	Phospho [S483(100); S492(98.1)]	0.968	0.85	0.602	0.609	1.156	1.186	1.098	0.45	0.714	1.433	1.354	1.122	0.998	0.889	0.989	0.732	0.366	0.388	92.1	104.4	94.9	112.8	106.6	94.1	95.1	113.6	60.2	118.8	80.5	95.5	97.8	133.7	128.4	159
FALSE	High	Master Protein	P36507	Dual specificity mitogen-activated protein kinase kinase 2 OS=Homo sapiens GN=MAP2K2 PE=1 SV=1	0.00754401	2.32248	2.25	1	3	1	1	400	44.396	6.55	Phospho [T394(99.1)]	0.938	0.977	1.044	1.056	0.303	1.385	1.005	1.42	0.769	1.025	0.953	1.073	1.123	1.038	1.422	1.334	1.269	1.063	82.6	88.6	98.9	122	94.5	125.2	88.1	90.2	131.1	95.8	96.4	71	123.2	92.3	31.8	107.6
FALSE	High	Master Protein	Q5JWF2	Guanine nucleotide-binding protein G(s) subunit alpha isoforms XLas OS=Homo sapiens GN=GNAS PE=1 SV=2	0.00782698	2.25524	0.867888	1	3	1	1	1037	110.956	5.03	Phospho [S995(100)]	1.163	0.544	2.501	0.725	0.358	0.949	0.94	1.02	0.486	1.155	0.386	0.748	0.955	1.383	0.955	1.703	0.887	0.677	121.4	98.1	99.6	99	78	99.6	104.3	44.1	82.7	112.1	202.7	39.4	138	81	48.3	155.9
FALSE	High	Master Protein	Q86WR7	Proline and serine-rich protein 2 OS=Homo sapiens GN=PROSER2 PE=1 SV=2	0.00782698	2.21204	2.29885	1	3	1	1	435	45.774	7.2	Phospho [S179(100)]	0.72	1.047	0.933	0.888	0.272	1.157	1.009	1.103	0.898	0.765	0.963	0.924	0.751	0.849	0.913	1.031	0.778	0.916	77.9	109.1	81.2	125.1	99.9	98.7	108.1	106.8	112.5	86.6	95.2	91.7	105.2	102	34.1	95.9
FALSE	High	Master Protein	H7C127	Bromodomain-containing protein 8 (Fragment) OS=Homo sapiens GN=BRD8 PE=1 SV=1	0.00798526	2.19511	1.56951	1	4	1	1	892	96.784	4.69	Phospho [T259(100); S263(100)]	0.938	1.32	2.648	0.847	1.472	0.937	0.699	0.495	1.101	2.83	0.995	0.901	1.058	0.648	1.048	0.58	1.874	1.456	99.8	74.4	112.5	99.7	95.9	111.5	106.4	118.6	44.5	58.2	237.9	98.9	52.1	89.8	98.4	189.1
FALSE	High	Master Protein	Q9H8W4	Pleckstrin homology domain-containing family F member 2 OS=Homo sapiens GN=PLEKHF2 PE=1 SV=1	0.00849802	2.12697	3.61446	1	4	1	1	249	27.78	8.21	Phospho [S226(99)]	0.906	1.729	0.893	0.644	0.256	1.612	0.893	1.29	1.453	0.798	1	0.824	1.071	0.574	1.15	0.699	0.926	0.781	85.1	83.8	100.5	151.3	77.4	108	93.9	158.4	118.2	52.6	81.8	133.1	64.1	91.6	33.2	103.3
FALSE	High	Master Protein	P54253	Ataxin-1 OS=Homo sapiens GN=ATXN1 PE=1 SV=2	0.00849802	2.09865	1.22699	1	4	1	1	815	86.869	8.35	Phospho [S406(100)]	0.948	0.942	0.957	0.871	0.438	1.339	0.959	1.086	0.861	0.726	0.761	0.935	1.087	0.904	1.196	0.969	1.021	0.654	88.9	89.9	101.9	125.6	87.7	112.2	93.8	98.1	113.2	94.1	99.7	89.7	100.9	104.2	56	92.9
FALSE	High	Master Protein	O75909	Cyclin-K OS=Homo sapiens GN=CCNK PE=1 SV=2	0.00849802	2.01184	1.72414	1	4	1	1	580	64.199	8.41	Phospho [S324(100)]	1.612	0.816	1.065	1.005	0.391	1.394	1.014	1.09	0.994	0.885	0.816	1.077	1.423	1.089	1.288	1.161	1.203	0.993	128.1	80.6	113.1	110.8	85.6	102.4	79.5	79.2	105.8	105.7	103.3	96.5	112.6	97	43.5	98.5
FALSE	High	Master Protein	Q15287	RNA-binding protein with serine-rich domain 1 OS=Homo sapiens GN=RNPS1 PE=1 SV=1	0.0093222	1.89279	2.95082	1	3	1	1	305	34.188	11.84	Phospho [S155(100); S157(100)]	0.751	0.643	1.405	1.344	0.221	1.27	1.274	0.854	0.66	0.648	0.919	1.088	1.009	0.774	1.422	1.165	1.245	2.165	67.3	114.2	90.4	113.8	97.5	127.3	89.6	69.2	92	83.4	151.2	71	125.4	107.7	20.5	60.1
[truncated: 30 more columns]
